# Supplementary material for: Identifying key drivers of habitability loss reveals pathways for climate change adaptation in the Pacific
Source: Research Square preprint supplement (doi:10.21203/rs.3.rs-6130097/v1), 2025-03-18
Supplement: Supplementary file 1 [file 0601cd8387faea9d1770d3c8.pdf]

Impact Matrix from Participatory System Mapping Workshop

|                          | Community | Household Expenses | Household Finances | Food Security | Future Safety | Health | Land | Livelihoods | Remittances | Water Availability | Shelter | Social Services | Transport Infrastructure | Utilities | Habitability |
|--------------------------|-----------|--------------------|--------------------|---------------|---------------|--------|------|-------------|-------------|--------------------|---------|-----------------|--------------------------|-----------|--------------|
| Community                | 0         | 0                  | 0                  | -2            | -2            | -2     | -3   | 2           | 2           | -3                 | 3       | 3               | 1                        | 0         | 0            |
| Household Expenses       | 0         | 0                  | -3                 | 0             | 0             | 0      | 0    | 3           | 0           | 0                  | 0       | 0               | 0                        | 0         | 0            |
| Household Finances       | 0         | 0                  | 0                  | 3             | 3             | 3      | 3    | -2          | 0           | 3                  | 3       | 3               | 0                        | 3         | 3            |
| Food Security            | 3         | 3                  | 0                  | 0             | 3             | 3      | 3    | 0           | -3          | 0                  | 0       | 0               | 0                        | 0         | 3            |
| Future Safety            | 3         | 0                  | -1                 | -2            | 0             | 2      | 0    | 3           | 0           | 0                  | 0       | 2               | 2                        | 2         | 3            |
| Health                   | 1         | 3                  | 0                  | 0             | 3             | 0      | 0    | 3           | 0           | 0                  | 0       | -2              | 0                        | 0         | 2            |
| Land                     | 2         | 0                  | 0                  | 3             | 3             | 0      | 0    | 3           | 0           | 3                  | 3       | 3               | 2                        | 1         | 3            |
| Livelihoods              | 0         | 0                  | 3                  | 3             | 3             | 0      | 0    | 0           | 0           | 0                  | 0       | 0               | 0                        | 1         | 2            |
| Remittances              | 0         | 0                  | 3                  | 0             | 0             | 2      | 0    | 1           | 0           | 0                  | 0       | 0               | 0                        | 0         | 0            |
| Water Availability       | 2         | -2                 | 0                  | 1             | 2             | 3      | 0    | 2           | 0           | 0                  | 0       | 0               | 0                        | 1         | 3            |
| Shelter                  | 2         | 2                  | 0                  | 0             | 3             | 3      | -2   | 2           | 0           | 0                  | 0       | 0               | 0                        | 2         | 3            |
| Social Services          | 2         | 2                  | 0                  | 0             | 3             | 3      | 0    | 0           | 2           | 2                  | 1       | 0               | 1                        | 1         | 2            |
| Transport Infrastructure | 1         | 0                  | 0                  | 1             | 3             | 1      | 1    | 2           | 0           | 2                  | 1       | 3               | 0                        | 1         | 0            |
| Utilities                | 2         | 2                  | 2                  | 0             | 0             | 2      | 0    | 0           | 1           | 1                  | 0       | 2               | 1                        | 0         | 2            |
| Habitability             | 3         | 0                  | 0                  | 0             | 3             | 1      | 0    | 0           | -2          | 0                  | 0       | 0               | 2                        | 2         | 0            |
