# Supplementary material for: Identifying key drivers of habitability loss reveals pathways for climate change adaptation in the Pacific
Source: Research Square preprint supplement (doi:10.21203/rs.3.rs-6130097/v1), 2025-03-18
Supplement: Supplementary file 3 [file 0d269047b71eb02b6d61321a.pdf]

Model Documentation

| Total           | Count | Including Array Elements |
|-----------------|-------|--------------------------|
| Variables       | 302   | 302                      |
| Modules         | 9     |                          |
| Stocks          | 11    | 11                       |
| Flows           | 26    | 26                       |
| Converters      | 265   | 265                      |
| Constants       | 93    | 93                       |
| Equations       | 198   | 198                      |
| Graphicals      | 45    | 45                       |
| Macro Variables | 5     |                          |

|                                                    | Equation                                                                                                                                                                                                                                                                                                                                                                                                                                                                                                                                                                                                                                                                                                                                                                                                                                                                                                                                                                                                                                                                                                                                                                                                                                                                                                                                     | Properties | Units     | Documentation                                                                                                                                                                                                                                       | Annotation |
|----------------------------------------------------|----------------------------------------------------------------------------------------------------------------------------------------------------------------------------------------------------------------------------------------------------------------------------------------------------------------------------------------------------------------------------------------------------------------------------------------------------------------------------------------------------------------------------------------------------------------------------------------------------------------------------------------------------------------------------------------------------------------------------------------------------------------------------------------------------------------------------------------------------------------------------------------------------------------------------------------------------------------------------------------------------------------------------------------------------------------------------------------------------------------------------------------------------------------------------------------------------------------------------------------------------------------------------------------------------------------------------------------------|------------|-----------|-----------------------------------------------------------------------------------------------------------------------------------------------------------------------------------------------------------------------------------------------------|------------|
| Top-Level Model:                                   |                                                                                                                                                                                                                                                                                                                                                                                                                                                                                                                                                                                                                                                                                                                                                                                                                                                                                                                                                                                                                                                                                                                                                                                                                                                                                                                                              |            |           |                                                                                                                                                                                                                                                     |            |
| Climate_Impacts:                                   |                                                                                                                                                                                                                                                                                                                                                                                                                                                                                                                                                                                                                                                                                                                                                                                                                                                                                                                                                                                                                                                                                                                                                                                                                                                                                                                                              |            |           |                                                                                                                                                                                                                                                     |            |
| degree_of_warming                                  | PROJECTED_TEMPERATURE- 27.77                                                                                                                                                                                                                                                                                                                                                                                                                                                                                                                                                                                                                                                                                                                                                                                                                                                                                                                                                                                                                                                                                                                                                                                                                                                                                                                 |            | Degrees C | The degree of warming is the projected temperature minus the average historical temperature between 1990-2022 (27.77deg c).                                                                                                                         |            |
| EFFECT_OF_SEA_LEVEL_RISE_ON_LAND_LOSS              | GRAPH(sea_level_rise) Points: (0.000, 0.000), (0.0612244897959, 0.0005165), (0.122448979592, 0.001171), (0.183673469388, 0.002004), (0.244897959184, 0.00307), (0.30612244898, 0.004438), (0.367346938776, 0.006198), (0.428571428571, 0.008466), (0.489795918367, 0.01139), (0.551020408163, 0.01516), (0.612244897959, 0.02001), (0.673469387755, 0.02625), (0.734693877551, 0.03425), (0.795918367347, 0.04447), (0.857142857143, 0.05746), (0.918367346939, 0.07386), (0.979591836735, 0.09439), (1.04081632653, 0.1198), (1.10204081633, 0.1509), (1.16326530612, 0.1883), (1.22448979592, 0.2323), (1.28571428571, 0.283), (1.34693877551, 0.3399), (1.40816326531, 0.4017), (1.4693877551, 0.4669), (1.5306122449, 0.5331), (1.59183673469, 0.5983), (1.65306122449, 0.6601), (1.71428571429, 0.717), (1.77551020408, 0.7677), (1.83673469388, 0.8117), (1.89795918367, 0.8491), (1.95918367347, 0.8802), (2.02040816327, 0.9056), (2.08163265306, 0.9261), (2.14285714286, 0.9425), (2.20408163265, 0.9555), (2.26530612245, 0.9658), (2.32653061224, 0.9738), (2.38775510204, 0.980), (2.44897959184, 0.9848), (2.51020408163, 0.9886), (2.57142857143, 0.9915), (2.63265306122, 0.9938), (2.69387755102, 0.9956), (2.75510204082, 0.9969), (2.81632653061, 0.998), (2.87755102041, 0.9988), (2.9387755102, 0.9995), (3.000, 1.000) |            | 1/year    | Relationship is estimated from researcher judgement.<br><br>Highest elevation in Tarawa is 3m.                                                                                                                                                      |            |
| function_for_effect_of_sea_level_rise_on_land_loss | MAX_FUNCTION_VALUE/(1+ EXP(- LOGISTIC_GROWTH_RATE*(sea_level_rise- FUNCTION_MIDPOINT)))                                                                                                                                                                                                                                                                                                                                                                                                                                                                                                                                                                                                                                                                                                                                                                                                                                                                                                                                                                                                                                                                                                                                                                                                                                                      |            | 1/year    | This logistic equation represents an S-shaped curve where parameters can be calibrated.<br><br>$f(x) = L / (1 + e^{-(k (x - x_0))})$<br>where:<br>L = curve's max value<br>k = logistic growth rate<br>x = sea level rise<br>x_0 = sigmoid midpoint |            |
| FUNCTION_MIDPOINT                                  | 1.5                                                                                                                                                                                                                                                                                                                                                                                                                                                                                                                                                                                                                                                                                                                                                                                                                                                                                                                                                                                                                                                                                                                                                                                                                                                                                                                                          |            | meters    | As the primary land analysis is based in South Tarawa, the highest elevation (3m) was used as the maximum x value. The midpoint value was thus 1.5m.                                                                                                |            |

|                       |                                                                                                                                                                                                                                                                                                                                                                                                                                                                                                                                                                                                                                                                                                     |  |           |                                                                                                                                                                                                                                                                                                                                                                                                                                                                                                                                           |  |
|-----------------------|-----------------------------------------------------------------------------------------------------------------------------------------------------------------------------------------------------------------------------------------------------------------------------------------------------------------------------------------------------------------------------------------------------------------------------------------------------------------------------------------------------------------------------------------------------------------------------------------------------------------------------------------------------------------------------------------------------|--|-----------|-------------------------------------------------------------------------------------------------------------------------------------------------------------------------------------------------------------------------------------------------------------------------------------------------------------------------------------------------------------------------------------------------------------------------------------------------------------------------------------------------------------------------------------------|--|
| HISTORIC_RAINFALL     | GRAPH(TIME) Points: (1990.00, 1861.59), (1991.00, 1876.01), (1992.00, 1746.04), (1993.00, 1851.57), (1994.00, 1458.13), (1995.00, 1047.48), (1996.00, 840.4), (1997.00, 1536.56), (1998.00, 1276.17), (1999.00, 1303.29), (2000.00, 1237.89), (2001.00, 1436.13), (2002.00, 1425.16), (2003.00, 1424.61), (2004.00, 1424.26), (2005.00, 1423.99), (2006.00, 1423.91), (2007.00, 1423.07), (2008.00, 1421.25), (2009.00, 1424.72), (2010.00, 1423.85), (2011.00, 1424.26), (2012.00, 1424.26), (2013.00, 1424.26), (2014.00, 1424.26), (2015.00, 1424.26), (2016.00, 1424.26), (2017.00, 1424.26), (2018.00, 1424.26), (2019.00, 1421.96), (2020.00, 1388.57), (2021.00, 1393.91), (2022.00, 1238.1) |  | mm / year | Historical rainfall data from World Bank Climate Knowledge Portal. Data downloaded from graphic, 'Observed Annual Precipitation of Kiribati for 1901-2022'. The annual mean rainfall per year was used.<br><br>Note: The same value was reported from 2011-2018. This data was used in the absence of other data to validate.<br><br>Source:<br><a href="https://climateknowledgeportal.worldbank.org/country/kiribati/climate-data-historical">https://climateknowledgeportal.worldbank.org/country/kiribati/climate-data-historical</a> |  |
| HISTORIC_TEMPERATURE  | GRAPH(TIME) Points: (1990.00, 27.750), (1991.00, 27.720), (1992.00, 27.710), (1993.00, 27.670), (1994.00, 27.740), (1995.00, 27.790), (1996.00, 27.750), (1997.00, 27.750), (1998.00, 27.790), (1999.00, 27.650), (2000.00, 27.720), (2001.00, 27.770), (2002.00, 27.790), (2003.00, 27.790), (2004.00, 27.800), (2005.00, 27.800), (2006.00, 27.780), (2007.00, 27.760), (2008.00, 27.730), (2009.00, 27.750), (2010.00, 27.690), (2011.00, 27.710), (2012.00, 27.790), (2013.00, 27.780), (2014.00, 27.780), (2015.00, 27.800), (2016.00, 27.810), (2017.00, 27.800), (2018.00, 27.780), (2019.00, 27.870), (2020.00, 27.920), (2021.00, 27.890), (2022.00, 27.770)                               |  | Degrees C | Data for historic temperature is from the World Bank Climate Knowledge Portal (Table: 'Observed Annual Average Mean Surface Air Temperature of Kiribati for 1901-2022').<br><br>Source:<br><a href="https://climateknowledgeportal.worldbank.org/country/kiribati/climate-data-historical">https://climateknowledgeportal.worldbank.org/country/kiribati/climate-data-historical</a>                                                                                                                                                      |  |
| LOGISTIC_GROWTH_RATE  | 5                                                                                                                                                                                                                                                                                                                                                                                                                                                                                                                                                                                                                                                                                                   |  | 1/meters  | Value was determined through calibration to historic land area data.                                                                                                                                                                                                                                                                                                                                                                                                                                                                      |  |
| MAX_FUNCTION_VALUE    | 1                                                                                                                                                                                                                                                                                                                                                                                                                                                                                                                                                                                                                                                                                                   |  | 1 / year  | A maximum function value of 1 indicates 100% inundation.                                                                                                                                                                                                                                                                                                                                                                                                                                                                                  |  |
| PROJECTED_RAINFALL    | IF TIME < 2023 THEN HISTORIC_RAINFALL ELSE ( IF SSP119_SWITCH = 1 THEN SSP119_RAINFALL_PROJECTIONS ELSE ( IF SSP126_SWITCH = 1 THEN SSP126_RAINFALL_PROJECTIONS ELSE ( IF SSP245_SWITCH = 1 THEN SSP245_RAINFALL_PROJECTIONS ELSE ( IF SSP370_SWITCH = 1 THEN SSP370_RAINFALL_PROJECTIONS ELSE ( IF SSP585_SWITCH = 1 THEN SSP585_RAINFALL_PROJECTIONS ELSE HISTORIC_RAINFALL))))))                                                                                                                                                                                                                                                                                                                 |  | mm / year | Historic data was available and used up to 2023, after which projected rainfall data was used for each respective SSP.                                                                                                                                                                                                                                                                                                                                                                                                                    |  |
| PROJECTED_TEMPERATURE | IF TIME < 2022 THEN HISTORIC_TEMPERATURE ELSE ( IF SSP119_SWITCH = 1 THEN SSP119_TEMPERATURE_PROJECTIONS ELSE ( IF SSP126_SWITCH = 1 THEN SSP126_TEMPERATURE_PROJECTIONS ELSE ( IF SSP245_SWITCH = 1 THEN SSP245_TEMPERATURE_PROJECTIONS ELSE ( IF SSP370_SWITCH = 1 THEN SSP370_TEMPERATURE_PROJECTIONS ELSE ( IF SSP585_SWITCH = 1 THEN SSP585_TEMPERATURE_PROJECTIONS ELSE HISTORIC_TEMPERATURE))))))                                                                                                                                                                                                                                                                                            |  | Degrees C | Historic data was available and used up to 2022, after which projected rainfall data was used for each respective SSP.<br><br>Note: there is a discrepancy between historic data in 2022 (27.77deg C) and the projected degrees of warming in 2022 for the SSPs where the projected temperature is lower than observed. As such, there is a dip in the trend at this point.                                                                                                                                                               |  |
| sea_level_rise        | IF TIME < 2020 THEN RAMP(0.0017, 1990, 2020) ELSE ( IF SSP119_SWITCH = 1 THEN SSP119_SLR_PROJECTIONS ELSE ( IF SSP126_SWITCH = 1 THEN SSP126_SLR_PROJECTIONS ELSE ( IF SSP126_SWITCH = 1 THEN SSP126_SLR_PROJECTIONS ELSE ( IF SSP245_SWITCH = 1 THEN SSP245_SLR_PROJECTIONS ELSE ( IF SSP370_SWITCH = 1 THEN SSP370_SLR_PROJECTIONS ELSE ( IF SSP585_SWITCH = 1 THEN SSP585_SLR_PROJECTIONS ELSE 0.05))))))                                                                                                                                                                                                                                                                                        |  | meters    | The average sea level from 1995-2014 (1.6535m) in Kiribati was used as the baseline. The ramp from 1990-2020 was calculated as the slope from baseline historic level to the beginning of the projections in 2020 (~1.70m).<br><br>After 2020, IPCC data was used for each respective SSP.                                                                                                                                                                                                                                                |  |

|                             |                                                                                                                                                                                                                                                                                                                                                                                                                                                                                                                                                                                                                                                                                                                                                                                                                                                                                                                                                                                                                                                                                                                                                                                                                                                                                                                                                                                                                                                                                                                                                                                                                                |  |               |                                                                                                                                                                                                                                                                                                                                                                            |  |
|-----------------------------|--------------------------------------------------------------------------------------------------------------------------------------------------------------------------------------------------------------------------------------------------------------------------------------------------------------------------------------------------------------------------------------------------------------------------------------------------------------------------------------------------------------------------------------------------------------------------------------------------------------------------------------------------------------------------------------------------------------------------------------------------------------------------------------------------------------------------------------------------------------------------------------------------------------------------------------------------------------------------------------------------------------------------------------------------------------------------------------------------------------------------------------------------------------------------------------------------------------------------------------------------------------------------------------------------------------------------------------------------------------------------------------------------------------------------------------------------------------------------------------------------------------------------------------------------------------------------------------------------------------------------------|--|---------------|----------------------------------------------------------------------------------------------------------------------------------------------------------------------------------------------------------------------------------------------------------------------------------------------------------------------------------------------------------------------------|--|
| SSP119_RAINFALL_PROJECTIONS | GRAPH(TIME) Points: (2023.00, 1167.33), (2024.00, 1220.17), (2025.00, 1233.9), (2026.00, 1245), (2027.00, 1280.07), (2028.00, 1301.72), (2029.00, 1215.78), (2030.00, 1166.27), (2031.00, 1372.81), (2032.00, 1211.7), (2033.00, 1182.72), (2034.00, 1246.4), (2035.00, 1281.81), (2036.00, 1247.51), (2037.00, 1373.13), (2038.00, 1301.07), (2039.00, 1256.84), (2040.00, 1327.65), (2041.00, 1284.92), (2042.00, 1299.49), (2043.00, 1307.63), (2044.00, 1276.37), (2045.00, 1259.89), (2046.00, 1412.38), (2047.00, 1268.71), (2048.00, 1351.38), (2049.00, 1422.8), (2050.00, 1329.69), (2051.00, 1311.53), (2052.00, 1294.12), (2053.00, 1314.64), (2054.00, 1308.11), (2055.00, 1361.28), (2056.00, 1385.51), (2057.00, 1367.48), (2058.00, 1331.65), (2059.00, 1343.04), (2060.00, 1392.39), (2061.00, 1387), (2062.00, 1395.24), (2063.00, 1377.5), (2064.00, 1341.15), (2065.00, 1318.92), (2066.00, 1466.13), (2067.00, 1341.92), (2068.00, 1350.75), (2069.00, 1361.45), (2070.00, 1329.98), (2071.00, 1320.11), (2072.00, 1346.68), (2073.00, 1439.24), (2074.00, 1355.44), (2075.00, 1343.56), (2076.00, 1394.49), (2077.00, 1333.43), (2078.00, 1411.36), (2079.00, 1356.94), (2080.00, 1310.75), (2081.00, 1354.38), (2082.00, 1358.96), (2083.00, 1358.63), (2084.00, 1350.53), (2085.00, 1383.17), (2086.00, 1383.76), (2087.00, 1356.83), (2088.00, 1375.95), (2089.00, 1372.54), (2090.00, 1332.2), (2091.00, 1361.32), (2092.00, 1354.06), (2093.00, 1356.43), (2094.00, 1380.08), (2095.00, 1364.32), (2096.00, 1356.94), (2097.00, 1366.57), (2098.00, 1434.37), (2099.00, 1383.03), (2100.00, 1423.84) |  | mm / year     | Data from Climate Change Knowledge Portal, 'Projected Precipitation'.<br><br><a href="https://climateknowledgeportal.worldbank.org/country/kiribati/cmip5">https://climateknowledgeportal.worldbank.org/country/kiribati/cmip5</a>                                                                                                                                         |  |
| SSP119_SLR_PROJECTIONS      | GRAPH(TIME) Points: (2020.00, 0.054), (2030.00, 0.100), (2040.00, 0.138), (2050.00, 0.193), (2060.00, 0.230), (2070.00, 0.293), (2080.00, 0.342), (2090.00, 0.404), (2100.00, 0.455)                                                                                                                                                                                                                                                                                                                                                                                                                                                                                                                                                                                                                                                                                                                                                                                                                                                                                                                                                                                                                                                                                                                                                                                                                                                                                                                                                                                                                                           |  | meters        | Projections are based on 'IPCC AR6 Sea-Level Rise Projections' specifically for Betio, South Tarawa, Kiribati (psmsl_id 1804). Median values for each SSP projection was used.<br><br>Projection values are relative to a 1995-2014 baseline. This baseline was calculated to be 1.6535m from the Australian Government Bureau of Meteorology's historical sea level data. |  |
| SSP119_SWITCH               | 0                                                                                                                                                                                                                                                                                                                                                                                                                                                                                                                                                                                                                                                                                                                                                                                                                                                                                                                                                                                                                                                                                                                                                                                                                                                                                                                                                                                                                                                                                                                                                                                                                              |  | Dimensionless | Switch turns on scenario for SSP 1-1.9.                                                                                                                                                                                                                                                                                                                                    |  |

|                                |                                                                                                                                                                                                                                                                                                                                                                                                                                                                                                                                                                                                                                                                                                                                                                                                                                                                                                                                                                                                                                                                                                                                                                                                                                                                                                                                                                                                                                                                                                                                                                                                                                                                                                                                         |  |           |                                                                                                                                                                                                                                                                                                                                                                                                                 |  |
|--------------------------------|-----------------------------------------------------------------------------------------------------------------------------------------------------------------------------------------------------------------------------------------------------------------------------------------------------------------------------------------------------------------------------------------------------------------------------------------------------------------------------------------------------------------------------------------------------------------------------------------------------------------------------------------------------------------------------------------------------------------------------------------------------------------------------------------------------------------------------------------------------------------------------------------------------------------------------------------------------------------------------------------------------------------------------------------------------------------------------------------------------------------------------------------------------------------------------------------------------------------------------------------------------------------------------------------------------------------------------------------------------------------------------------------------------------------------------------------------------------------------------------------------------------------------------------------------------------------------------------------------------------------------------------------------------------------------------------------------------------------------------------------|--|-----------|-----------------------------------------------------------------------------------------------------------------------------------------------------------------------------------------------------------------------------------------------------------------------------------------------------------------------------------------------------------------------------------------------------------------|--|
| SSP119_TEMPERATURE_PROJECTIONS | GRAPH(TIME) Points: (2014.00, 26.890), (2015.00, 27.010), (2016.00, 27.060), (2017.00, 27.120), (2018.00, 27.140), (2019.00, 27.110), (2020.00, 27.110), (2021.00, 27.180), (2022.00, 27.170), (2023.00, 27.220), (2024.00, 27.220), (2025.00, 27.230), (2026.00, 27.260), (2027.00, 27.330), (2028.00, 27.370), (2029.00, 27.240), (2030.00, 27.350), (2031.00, 27.470), (2032.00, 27.320), (2033.00, 27.310), (2034.00, 27.340), (2035.00, 27.380), (2036.00, 27.420), (2037.00, 27.490), (2038.00, 27.510), (2039.00, 27.440), (2040.00, 27.450), (2041.00, 27.480), (2042.00, 27.480), (2043.00, 27.490), (2044.00, 27.460), (2045.00, 27.520), (2046.00, 27.580), (2047.00, 27.500), (2048.00, 27.590), (2049.00, 27.570), (2050.00, 27.520), (2051.00, 27.490), (2052.00, 27.470), (2053.00, 27.500), (2054.00, 27.470), (2055.00, 27.510), (2056.00, 27.540), (2057.00, 27.550), (2058.00, 27.540), (2059.00, 27.520), (2060.00, 27.530), (2061.00, 27.510), (2062.00, 27.510), (2063.00, 27.470), (2064.00, 27.470), (2065.00, 27.470), (2066.00, 27.500), (2067.00, 27.450), (2068.00, 27.470), (2069.00, 27.480), (2070.00, 27.430), (2071.00, 27.450), (2072.00, 27.450), (2073.00, 27.440), (2074.00, 27.440), (2075.00, 27.400), (2076.00, 27.400), (2077.00, 27.390), (2078.00, 27.380), (2079.00, 27.370), (2080.00, 27.360), (2081.00, 27.390), (2082.00, 27.400), (2083.00, 27.380), (2084.00, 27.350), (2085.00, 27.380), (2086.00, 27.360), (2087.00, 27.350), (2088.00, 27.350), (2089.00, 27.340), (2090.00, 27.340), (2091.00, 27.350), (2092.00, 27.350), (2093.00, 27.340), (2094.00, 27.410), (2095.00, 27.340), (2096.00, 27.380), (2097.00, 27.380), (2098.00, 27.430), (2099.00, 27.450), (2100.00, 27.440) |  | Degrees C | Data for projected temperature is from the World Bank Climate Knowledge Portal (Table: 'Projected Average Mean Surface Air Temperature Kiribati; (Ref. Period:1995-2014), Multi-Model Ensemble').<br><br>Source:<br><a href="https://climateknowledgeportal.worldbank.org/country/kiribati/climate-data-projections">https://climateknowledgeportal.worldbank.org/country/kiribati/climate-data-projections</a> |  |
| SSP126_RAINFALL_PROJECTIONS    | GRAPH(TIME) Points: (2023.00, 1260.31), (2024.00, 1399.4), (2025.00, 1196.26), (2026.00, 1154.97), (2027.00, 1187.94), (2028.00, 1405.49), (2029.00, 1304.56), (2030.00, 1264.23), (2031.00, 1427.6), (2032.00, 1155.48), (2033.00, 1319.07), (2034.00, 1418.04), (2035.00, 1196.03), (2036.00, 1182.95), (2037.00, 1336.78), (2038.00, 1263.27), (2039.00, 1243.77), (2040.00, 1226.55), (2041.00, 1335.3), (2042.00, 1340.87), (2043.00, 1363.93), (2044.00, 1272.48), (2045.00, 1269.65), (2046.00, 1600.82), (2047.00, 1313.62), (2048.00, 1182.41), (2049.00, 1373.21), (2050.00, 1589.61), (2051.00, 1402.61), (2052.00, 1101.57), (2053.00, 1265.18), (2054.00, 1325), (2055.00, 1487.43), (2056.00, 1557.23), (2057.00, 1463.88), (2058.00, 1256.94), (2059.00, 1270.18), (2060.00, 1302.74), (2061.00, 1367.56), (2062.00, 1393.32), (2063.00, 1449.48), (2064.00, 1394.45), (2065.00, 1112.87), (2066.00, 1784.74), (2067.00, 1507.69), (2068.00, 1347.37), (2069.00, 1271.56), (2070.00, 1302.84), (2071.00, 1223.27), (2072.00, 1409.27), (2073.00, 1601.04), (2074.00, 1304.19), (2075.00, 1337.9), (2076.00, 1438.73), (2077.00, 1364.49), (2078.00, 1833.67), (2079.00, 1392.75), (2080.00, 1168.29), (2081.00, 1416.76), (2082.00, 1558.89), (2083.00, 1294.41), (2084.00, 1311), (2085.00, 1466.28), (2086.00, 1591.07), (2087.00, 1430.22), (2088.00, 1302.08), (2089.00, 1378.55), (2090.00, 1303.01), (2091.00, 1511.85), (2092.00, 1353.85), (2093.00, 1312.62), (2094.00, 1151.67), (2095.00, 1308.08), (2096.00, 1230.38), (2097.00, 1254.07), (2098.00, 1504.77), (2099.00, 1457.32), (2100.00, 1464.1)                                                                                                         |  | mm / year | Data from Climate Change Knowledge Portal, 'Projected Precipitation'.<br><br><a href="https://climateknowledgeportal.worldbank.org/country/kiribati/cmip5">https://climateknowledgeportal.worldbank.org/country/kiribati/cmip5</a>                                                                                                                                                                              |  |

|                                |                                                                                                                                                                                                                                                                                                                                                                                                                                                                                                                                                                                                                                                                                                                                                                                                                                                                                                                                                                                                                                                                                                                                                                                                                                                                                                                                                                                                                                                                                                                                                                                                                                                                                                                                         |  |               |                                                                                                                                                                                                                                                                                                                                                                                                                 |  |
|--------------------------------|-----------------------------------------------------------------------------------------------------------------------------------------------------------------------------------------------------------------------------------------------------------------------------------------------------------------------------------------------------------------------------------------------------------------------------------------------------------------------------------------------------------------------------------------------------------------------------------------------------------------------------------------------------------------------------------------------------------------------------------------------------------------------------------------------------------------------------------------------------------------------------------------------------------------------------------------------------------------------------------------------------------------------------------------------------------------------------------------------------------------------------------------------------------------------------------------------------------------------------------------------------------------------------------------------------------------------------------------------------------------------------------------------------------------------------------------------------------------------------------------------------------------------------------------------------------------------------------------------------------------------------------------------------------------------------------------------------------------------------------------|--|---------------|-----------------------------------------------------------------------------------------------------------------------------------------------------------------------------------------------------------------------------------------------------------------------------------------------------------------------------------------------------------------------------------------------------------------|--|
| SSP126_SLR_PROJECTIONS         | GRAPH(TIME) Points: (2020.00, 0.056), (2030.00, 0.099), (2040.00, 0.147), (2050.00, 0.210), (2060.00, 0.259), (2070.00, 0.330), (2080.00, 0.391), (2090.00, 0.449), (2100.00, 0.510)                                                                                                                                                                                                                                                                                                                                                                                                                                                                                                                                                                                                                                                                                                                                                                                                                                                                                                                                                                                                                                                                                                                                                                                                                                                                                                                                                                                                                                                                                                                                                    |  | meters        | Projections are based on 'IPCC AR6 Sea-Level Rise Projections' specifically for Betio, South Tarawa, Kiribati (psmsl_id 1804). Median values for each SSP projection was used.<br><br>Projection values are relative to a 1995-2014 baseline. This baseline was calculated to be 1.6535m from the Australian Government Bureau of Meteorology's historical sea level data.                                      |  |
| SSP126_SWITCH                  | 0                                                                                                                                                                                                                                                                                                                                                                                                                                                                                                                                                                                                                                                                                                                                                                                                                                                                                                                                                                                                                                                                                                                                                                                                                                                                                                                                                                                                                                                                                                                                                                                                                                                                                                                                       |  | Dimensionless | Switch turns on scenario for SSP 1-2.6.                                                                                                                                                                                                                                                                                                                                                                         |  |
| SSP126_TEMPERATURE_PROJECTIONS | GRAPH(TIME) Points: (2014.00, 26.890), (2015.00, 27.080), (2016.00, 27.110), (2017.00, 27.090), (2018.00, 27.060), (2019.00, 27.350), (2020.00, 27.310), (2021.00, 27.180), (2022.00, 27.070), (2023.00, 27.400), (2024.00, 27.370), (2025.00, 27.190), (2026.00, 27.200), (2027.00, 27.300), (2028.00, 27.410), (2029.00, 27.350), (2030.00, 27.510), (2031.00, 27.580), (2032.00, 27.340), (2033.00, 27.530), (2034.00, 27.450), (2035.00, 27.440), (2036.00, 27.590), (2037.00, 27.560), (2038.00, 27.550), (2039.00, 27.510), (2040.00, 27.380), (2041.00, 27.670), (2042.00, 27.720), (2043.00, 27.610), (2044.00, 27.530), (2045.00, 27.570), (2046.00, 27.870), (2047.00, 27.660), (2048.00, 27.700), (2049.00, 27.820), (2050.00, 27.830), (2051.00, 27.610), (2052.00, 27.520), (2053.00, 27.790), (2054.00, 27.660), (2055.00, 27.760), (2056.00, 27.840), (2057.00, 27.770), (2058.00, 27.740), (2059.00, 27.720), (2060.00, 27.700), (2061.00, 27.760), (2062.00, 27.920), (2063.00, 27.830), (2064.00, 27.730), (2065.00, 27.770), (2066.00, 28.000), (2067.00, 27.770), (2068.00, 27.800), (2069.00, 27.980), (2070.00, 27.730), (2071.00, 27.750), (2072.00, 27.760), (2073.00, 27.900), (2074.00, 27.890), (2075.00, 27.890), (2076.00, 27.830), (2077.00, 27.850), (2078.00, 27.840), (2079.00, 27.790), (2080.00, 27.760), (2081.00, 27.970), (2082.00, 27.940), (2083.00, 27.800), (2084.00, 27.810), (2085.00, 27.790), (2086.00, 27.830), (2087.00, 27.710), (2088.00, 27.690), (2089.00, 27.710), (2090.00, 27.720), (2091.00, 27.850), (2092.00, 27.730), (2093.00, 27.670), (2094.00, 27.860), (2095.00, 27.650), (2096.00, 27.660), (2097.00, 27.630), (2098.00, 27.810), (2099.00, 27.830), (2100.00, 27.710) |  | Degrees C     | Data for projected temperature is from the World Bank Climate Knowledge Portal (Table: 'Projected Average Mean Surface Air Temperature Kiribati; (Ref. Period:1995-2014), Multi-Model Ensemble').<br><br>Source:<br><a href="https://climateknowledgeportal.worldbank.org/country/kiribati/climate-data-projections">https://climateknowledgeportal.worldbank.org/country/kiribati/climate-data-projections</a> |  |

|                                |                                                                                                                                                                                                                                                                                                                                                                                                                                                                                                                                                                                                                                                                                                                                                                                                                                                                                                                                                                                                                                                                                                                                                                                                                                                                                                                                                                                                                                                                                                                                                                                                                                                                                                                                                |  |               |                                                                                                                                                                                                                                                                                                                                                                                                                         |  |
|--------------------------------|------------------------------------------------------------------------------------------------------------------------------------------------------------------------------------------------------------------------------------------------------------------------------------------------------------------------------------------------------------------------------------------------------------------------------------------------------------------------------------------------------------------------------------------------------------------------------------------------------------------------------------------------------------------------------------------------------------------------------------------------------------------------------------------------------------------------------------------------------------------------------------------------------------------------------------------------------------------------------------------------------------------------------------------------------------------------------------------------------------------------------------------------------------------------------------------------------------------------------------------------------------------------------------------------------------------------------------------------------------------------------------------------------------------------------------------------------------------------------------------------------------------------------------------------------------------------------------------------------------------------------------------------------------------------------------------------------------------------------------------------|--|---------------|-------------------------------------------------------------------------------------------------------------------------------------------------------------------------------------------------------------------------------------------------------------------------------------------------------------------------------------------------------------------------------------------------------------------------|--|
| SSP245_RAINFALL_PROJECTIONS    | <p>GRAPH(TIME) Points: (2023.00, 1092.68), (2024.00, 1272.56), (2025.00, 1257.53), (2026.00, 1300.68), (2027.00, 1101.41), (2028.00, 1178.82), (2029.00, 1403.35), (2030.00, 1026.44), (2031.00, 1387.39), (2032.00, 1332.67), (2033.00, 1035.28), (2034.00, 1307.76), (2035.00, 1282.08), (2036.00, 1084.69), (2037.00, 1550.15), (2038.00, 1327.61), (2039.00, 1112.76), (2040.00, 1419.58), (2041.00, 1409.22), (2042.00, 1262.12), (2043.00, 1174.72), (2044.00, 1148.96), (2045.00, 1183.4), (2046.00, 1462.39), (2047.00, 1155.72), (2048.00, 1525.48), (2049.00, 1418.44), (2050.00, 1240.55), (2051.00, 1294.82), (2052.00, 1342.03), (2053.00, 1262.26), (2054.00, 1328.9), (2055.00, 1472.07), (2056.00, 1223.78), (2057.00, 1288.79), (2058.00, 1389.2), (2059.00, 1615.82), (2060.00, 1560.91), (2061.00, 1364.62), (2062.00, 1541.98), (2063.00, 1470.3), (2064.00, 1311.35), (2065.00, 1538.01), (2066.00, 1649.34), (2067.00, 1146.92), (2068.00, 1611.08), (2069.00, 1341.78), (2070.00, 1242.15), (2071.00, 1411.49), (2072.00, 1552.06), (2073.00, 1689.13), (2074.00, 1291.28), (2075.00, 1317.84), (2076.00, 1776.5), (2077.00, 1574.7), (2078.00, 1375.73), (2079.00, 1270.85), (2080.00, 1375.76), (2081.00, 1557.94), (2082.00, 1405.64), (2083.00, 1620.45), (2084.00, 1689.21), (2085.00, 1682.4), (2086.00, 1553.91), (2087.00, 1480.84), (2088.00, 1701.92), (2089.00, 1437.21), (2090.00, 1452.37), (2091.00, 1439.49), (2092.00, 1619.99), (2093.00, 1444.08), (2094.00, 1579.43), (2095.00, 1677.48), (2096.00, 1406.68), (2097.00, 1394.27), (2098.00, 1719.36), (2099.00, 1345.17), (2100.00, 1672.54)</p>                                                                                                     |  | mm / year     | <p>Data from Climate Change Knowledge Portal, 'Projected Precipitation'.</p> <p><a href="https://climateknowledgeportal.worldbank.org/country/kiribati/cmip5">https://climateknowledgeportal.worldbank.org/country/kiribati/cmip5</a></p>                                                                                                                                                                               |  |
| SSP245_SLR_PROJECTIONS         | <p>GRAPH(TIME) Points: (2020.00, 0.052), (2030.00, 0.099), (2040.00, 0.152), (2050.00, 0.226), (2060.00, 0.290), (2070.00, 0.367), (2080.00, 0.452), (2090.00, 0.537), (2100.00, 0.628)</p>                                                                                                                                                                                                                                                                                                                                                                                                                                                                                                                                                                                                                                                                                                                                                                                                                                                                                                                                                                                                                                                                                                                                                                                                                                                                                                                                                                                                                                                                                                                                                    |  | meters        | <p>Projections are based on 'IPCC AR6 Sea-Level Rise Projections' specifically for Betio, South Tarawa, Kiribati (psmsl_id 1804). Median values for each SSP projection was used.</p> <p>Projection values are relative to a 1995-2014 baseline. This baseline was calculated to be 1.6535m from the Australian Government Bureau of Meteorology's historical sea level data.</p>                                       |  |
| SSP245_SWITCH                  | 0                                                                                                                                                                                                                                                                                                                                                                                                                                                                                                                                                                                                                                                                                                                                                                                                                                                                                                                                                                                                                                                                                                                                                                                                                                                                                                                                                                                                                                                                                                                                                                                                                                                                                                                                              |  | Dimensionless | Switch turns on scenario for SSP 2-4.5.                                                                                                                                                                                                                                                                                                                                                                                 |  |
| SSP245_TEMPERATURE_PROJECTIONS | <p>GRAPH(TIME) Points: (2014.00, 26.890), (2015.00, 26.920), (2016.00, 26.960), (2017.00, 27.050), (2018.00, 27.010), (2019.00, 26.900), (2020.00, 27.020), (2021.00, 27.270), (2022.00, 27.210), (2023.00, 27.180), (2024.00, 27.300), (2025.00, 27.230), (2026.00, 27.260), (2027.00, 27.270), (2028.00, 27.420), (2029.00, 27.340), (2030.00, 27.480), (2031.00, 27.660), (2032.00, 27.450), (2033.00, 27.300), (2034.00, 27.410), (2035.00, 27.470), (2036.00, 27.470), (2037.00, 27.730), (2038.00, 27.740), (2039.00, 27.520), (2040.00, 27.680), (2041.00, 27.690), (2042.00, 27.550), (2043.00, 27.650), (2044.00, 27.580), (2045.00, 27.790), (2046.00, 27.900), (2047.00, 27.740), (2048.00, 27.950), (2049.00, 27.940), (2050.00, 27.870), (2051.00, 27.900), (2052.00, 27.930), (2053.00, 27.820), (2054.00, 27.910), (2055.00, 27.900), (2056.00, 28.040), (2057.00, 28.070), (2058.00, 28.090), (2059.00, 28.210), (2060.00, 28.250), (2061.00, 27.990), (2062.00, 28.020), (2063.00, 28.070), (2064.00, 28.070), (2065.00, 28.200), (2066.00, 28.050), (2067.00, 27.990), (2068.00, 28.270), (2069.00, 28.160), (2070.00, 28.200), (2071.00, 28.330), (2072.00, 28.400), (2073.00, 28.320), (2074.00, 28.200), (2075.00, 28.290), (2076.00, 28.430), (2077.00, 28.350), (2078.00, 28.300), (2079.00, 28.450), (2080.00, 28.300), (2081.00, 28.390), (2082.00, 28.420), (2083.00, 28.500), (2084.00, 28.570), (2085.00, 28.650), (2086.00, 28.470), (2087.00, 28.560), (2088.00, 28.500), (2089.00, 28.470), (2090.00, 28.580), (2091.00, 28.630), (2092.00, 28.640), (2093.00, 28.420), (2094.00, 28.610), (2095.00, 28.560), (2096.00, 28.500), (2097.00, 28.550), (2098.00, 28.550), (2099.00, 28.610), (2100.00, 28.690)</p> |  | Degrees C     | <p>Data for projected temperature is from the World Bank Climate Knowledge Portal (Table: 'Projected Average Mean Surface Air Temperature Kiribati; (Ref. Period:1995-2014), Multi-Model Ensemble').</p> <p>Source:<br/><a href="https://climateknowledgeportal.worldbank.org/country/kiribati/climate-data-projections">https://climateknowledgeportal.worldbank.org/country/kiribati/climate-data-projections</a></p> |  |

|                                |                                                                                                                                                                                                                                                                                                                                                                                                                                                                                                                                                                                                                                                                                                                                                                                                                                                                                                                                                                                                                                                                                                                                                                                                                                                                                                                                                                                                                                                                                                                                                                                                                                                                                                                                         |  |               |                                                                                                                                                                                                                                                                                                                                                                                                                 |  |
|--------------------------------|-----------------------------------------------------------------------------------------------------------------------------------------------------------------------------------------------------------------------------------------------------------------------------------------------------------------------------------------------------------------------------------------------------------------------------------------------------------------------------------------------------------------------------------------------------------------------------------------------------------------------------------------------------------------------------------------------------------------------------------------------------------------------------------------------------------------------------------------------------------------------------------------------------------------------------------------------------------------------------------------------------------------------------------------------------------------------------------------------------------------------------------------------------------------------------------------------------------------------------------------------------------------------------------------------------------------------------------------------------------------------------------------------------------------------------------------------------------------------------------------------------------------------------------------------------------------------------------------------------------------------------------------------------------------------------------------------------------------------------------------|--|---------------|-----------------------------------------------------------------------------------------------------------------------------------------------------------------------------------------------------------------------------------------------------------------------------------------------------------------------------------------------------------------------------------------------------------------|--|
| SSP370_RAINFALL_PROJECTIONS    | GRAPH(TIME) Points: (2023.00, 1192.09), (2024.00, 1024.71), (2025.00, 1275.12), (2026.00, 1316.71), (2027.00, 1595.64), (2028.00, 1419.85), (2029.00, 945.93), (2030.00, 1039.44), (2031.00, 1281.69), (2032.00, 1219.7), (2033.00, 1167.95), (2034.00, 1160.24), (2035.00, 1247.65), (2036.00, 1307.53), (2037.00, 1567.28), (2038.00, 1357.43), (2039.00, 1197.8), (2040.00, 1240.62), (2041.00, 1178.76), (2042.00, 1494.31), (2043.00, 1336.53), (2044.00, 1248.26), (2045.00, 1201.06), (2046.00, 1464.66), (2047.00, 1253.74), (2048.00, 1358.8), (2049.00, 1636.48), (2050.00, 1319.7), (2051.00, 1304.95), (2052.00, 1255.27), (2053.00, 1443.44), (2054.00, 1309.65), (2055.00, 1286.09), (2056.00, 1554.15), (2057.00, 1531.21), (2058.00, 1476.12), (2059.00, 1160.58), (2060.00, 1624.21), (2061.00, 1695.21), (2062.00, 1573.9), (2063.00, 1433.26), (2064.00, 1540.66), (2065.00, 1553.46), (2066.00, 1408.92), (2067.00, 1477.64), (2068.00, 1601.26), (2069.00, 1689.66), (2070.00, 1411.99), (2071.00, 1488.44), (2072.00, 1542.34), (2073.00, 1628.16), (2074.00, 1817.87), (2075.00, 1705.97), (2076.00, 1606.47), (2077.00, 1430.03), (2078.00, 1769.11), (2079.00, 1811.83), (2080.00, 1637.3), (2081.00, 1435.05), (2082.00, 1461.1), (2083.00, 1875.98), (2084.00, 1700.22), (2085.00, 1457.08), (2086.00, 1617.37), (2087.00, 1556.22), (2088.00, 1973.38), (2089.00, 2250.34), (2090.00, 1474.76), (2091.00, 1315.89), (2092.00, 1787.84), (2093.00, 2041.03), (2094.00, 2124.54), (2095.00, 1721.06), (2096.00, 1928.98), (2097.00, 2155.15), (2098.00, 2068.71), (2099.00, 2048.87), (2100.00, 2085.43)                                                                                                      |  | mm / year     | Data from Climate Change Knowledge Portal, 'Projected Precipitation'.<br><br><a href="https://climateknowledgeportal.worldbank.org/country/kiribati/cmip5">https://climateknowledgeportal.worldbank.org/country/kiribati/cmip5</a>                                                                                                                                                                              |  |
| SSP370_SLR_PROJECTIONS         | GRAPH(TIME) Points: (2020.00, 0.050), (2030.00, 0.099), (2040.00, 0.159), (2050.00, 0.235), (2060.00, 0.308), (2070.00, 0.398), (2080.00, 0.501), (2090.00, 0.616), (2100.00, 0.740)                                                                                                                                                                                                                                                                                                                                                                                                                                                                                                                                                                                                                                                                                                                                                                                                                                                                                                                                                                                                                                                                                                                                                                                                                                                                                                                                                                                                                                                                                                                                                    |  | meters        | Projections are based on 'IPCC AR6 Sea-Level Rise Projections' specifically for Betio, South Tarawa, Kiribati (psmsl_id 1804). Median values for each SSP projection was used.<br><br>Projection values are relative to a 1995-2014 baseline. This baseline was calculated to be 1.6535m from the Australian Government Bureau of Meteorology's historical sea level data.                                      |  |
| SSP370_SWITCH                  | 0                                                                                                                                                                                                                                                                                                                                                                                                                                                                                                                                                                                                                                                                                                                                                                                                                                                                                                                                                                                                                                                                                                                                                                                                                                                                                                                                                                                                                                                                                                                                                                                                                                                                                                                                       |  | Dimensionless | Switch turns on scenario for SSP 3-7.0.                                                                                                                                                                                                                                                                                                                                                                         |  |
| SSP370_TEMPERATURE_PROJECTIONS | GRAPH(TIME) Points: (2014.00, 26.890), (2015.00, 26.970), (2016.00, 27.040), (2017.00, 27.150), (2018.00, 27.320), (2019.00, 27.290), (2020.00, 27.000), (2021.00, 27.120), (2022.00, 27.330), (2023.00, 27.190), (2024.00, 27.090), (2025.00, 27.400), (2026.00, 27.320), (2027.00, 27.550), (2028.00, 27.430), (2029.00, 27.160), (2030.00, 27.300), (2031.00, 27.500), (2032.00, 27.490), (2033.00, 27.440), (2034.00, 27.460), (2035.00, 27.430), (2036.00, 27.540), (2037.00, 27.780), (2038.00, 27.730), (2039.00, 27.510), (2040.00, 27.560), (2041.00, 27.650), (2042.00, 27.760), (2043.00, 27.670), (2044.00, 27.680), (2045.00, 27.840), (2046.00, 28.010), (2047.00, 27.880), (2048.00, 28.030), (2049.00, 27.990), (2050.00, 27.950), (2051.00, 27.880), (2052.00, 27.990), (2053.00, 27.970), (2054.00, 28.000), (2055.00, 28.210), (2056.00, 28.250), (2057.00, 28.320), (2058.00, 28.350), (2059.00, 28.100), (2060.00, 28.480), (2061.00, 28.470), (2062.00, 28.330), (2063.00, 28.230), (2064.00, 28.440), (2065.00, 28.340), (2066.00, 28.540), (2067.00, 28.620), (2068.00, 28.760), (2069.00, 28.660), (2070.00, 28.580), (2071.00, 28.760), (2072.00, 28.860), (2073.00, 28.730), (2074.00, 28.910), (2075.00, 28.680), (2076.00, 28.610), (2077.00, 28.860), (2078.00, 28.810), (2079.00, 28.870), (2080.00, 28.990), (2081.00, 28.960), (2082.00, 29.190), (2083.00, 29.340), (2084.00, 28.980), (2085.00, 29.270), (2086.00, 29.260), (2087.00, 29.350), (2088.00, 29.590), (2089.00, 29.440), (2090.00, 29.140), (2091.00, 29.010), (2092.00, 29.340), (2093.00, 29.520), (2094.00, 29.730), (2095.00, 29.320), (2096.00, 29.630), (2097.00, 29.580), (2098.00, 29.900), (2099.00, 29.910), (2100.00, 29.680) |  | Degrees C     | Data for projected temperature is from the World Bank Climate Knowledge Portal (Table: 'Projected Average Mean Surface Air Temperature Kiribati; (Ref. Period:1995-2014), Multi-Model Ensemble').<br><br>Source:<br><a href="https://climateknowledgeportal.worldbank.org/country/kiribati/climate-data-projections">https://climateknowledgeportal.worldbank.org/country/kiribati/climate-data-projections</a> |  |

|                                |                                                                                                                                                                                                                                                                                                                                                                                                                                                                                                                                                                                                                                                                                                                                                                                                                                                                                                                                                                                                                                                                                                                                                                                                                                                                                                                                                                                                                                                                                                                                                                                                                                                                                                                                                |  |               |                                                                                                                                                                                                                                                                                                                                                                                                                         |  |
|--------------------------------|------------------------------------------------------------------------------------------------------------------------------------------------------------------------------------------------------------------------------------------------------------------------------------------------------------------------------------------------------------------------------------------------------------------------------------------------------------------------------------------------------------------------------------------------------------------------------------------------------------------------------------------------------------------------------------------------------------------------------------------------------------------------------------------------------------------------------------------------------------------------------------------------------------------------------------------------------------------------------------------------------------------------------------------------------------------------------------------------------------------------------------------------------------------------------------------------------------------------------------------------------------------------------------------------------------------------------------------------------------------------------------------------------------------------------------------------------------------------------------------------------------------------------------------------------------------------------------------------------------------------------------------------------------------------------------------------------------------------------------------------|--|---------------|-------------------------------------------------------------------------------------------------------------------------------------------------------------------------------------------------------------------------------------------------------------------------------------------------------------------------------------------------------------------------------------------------------------------------|--|
| SSP585_RAINFALL_PROJECTIONS    | <p>GRAPH(TIME) Points: (2023.00, 1090.7), (2024.00, 1187.51), (2025.00, 1187.44), (2026.00, 1187.89), (2027.00, 1216.32), (2028.00, 1208.29), (2029.00, 1195.79), (2030.00, 1296.46), (2031.00, 1476.86), (2032.00, 1090.37), (2033.00, 1142.79), (2034.00, 1062.64), (2035.00, 1438.13), (2036.00, 1422.71), (2037.00, 1106.15), (2038.00, 1293.65), (2039.00, 1500.08), (2040.00, 1534.34), (2041.00, 1228.68), (2042.00, 1115.68), (2043.00, 1430.46), (2044.00, 1488.82), (2045.00, 1400.02), (2046.00, 1329.48), (2047.00, 1371.76), (2048.00, 1562.75), (2049.00, 1627.84), (2050.00, 1241.75), (2051.00, 1333.22), (2052.00, 1655.35), (2053.00, 1457.23), (2054.00, 1393.86), (2055.00, 1437.13), (2056.00, 1557.13), (2057.00, 1511.23), (2058.00, 1478.82), (2059.00, 1655.88), (2060.00, 1618.68), (2061.00, 1666.77), (2062.00, 1637.72), (2063.00, 1646.51), (2064.00, 1469.51), (2065.00, 1443.24), (2066.00, 1889.01), (2067.00, 1633.96), (2068.00, 1255.64), (2069.00, 1892.83), (2070.00, 1931.08), (2071.00, 1640.38), (2072.00, 1328.43), (2073.00, 1975.1), (2074.00, 1860.67), (2075.00, 1721.82), (2076.00, 1708.73), (2077.00, 1458.36), (2078.00, 1509.08), (2079.00, 1908.96), (2080.00, 1750.88), (2081.00, 1837.98), (2082.00, 1776.76), (2083.00, 1682.2), (2084.00, 1594.2), (2085.00, 2161.66), (2086.00, 1836.84), (2087.00, 2001.99), (2088.00, 1919.98), (2089.00, 1753.03), (2090.00, 2064.48), (2091.00, 2269.25), (2092.00, 1682.81), (2093.00, 1878.97), (2094.00, 2585.36), (2095.00, 2020.26), (2096.00, 2321.99), (2097.00, 2158.2), (2098.00, 2295.86), (2099.00, 2001.93), (2100.00, 2143.09)</p>                                                                                                   |  | mm / year     | <p>Data from Climate Change Knowledge Portal, 'Projected Precipitation'.</p> <p><a href="https://climateknowledgeportal.worldbank.org/country/kiribati/cmip5">https://climateknowledgeportal.worldbank.org/country/kiribati/cmip5</a></p>                                                                                                                                                                               |  |
| SSP585_SLR_PROJECTIONS         | <p>GRAPH(TIME) Points: (2020.00, 0.060), (2030.00, 0.111), (2040.00, 0.169), (2050.00, 0.250), (2060.00, 0.334), (2070.00, 0.439), (2080.00, 0.554), (2090.00, 0.692), (2100.00, 0.826)</p>                                                                                                                                                                                                                                                                                                                                                                                                                                                                                                                                                                                                                                                                                                                                                                                                                                                                                                                                                                                                                                                                                                                                                                                                                                                                                                                                                                                                                                                                                                                                                    |  | meters        | <p>Projections are based on 'IPCC AR6 Sea-Level Rise Projections' specifically for Betio, South Tarawa, Kiribati (psmsl_id 1804). Median values for each SSP projection was used.</p> <p>Projection values are relative to a 1995-2014 baseline. This baseline was calculated to be 1.6535m from the Australian Government Bureau of Meteorology's historical sea level data.</p>                                       |  |
| SSP585_SWITCH                  | 1                                                                                                                                                                                                                                                                                                                                                                                                                                                                                                                                                                                                                                                                                                                                                                                                                                                                                                                                                                                                                                                                                                                                                                                                                                                                                                                                                                                                                                                                                                                                                                                                                                                                                                                                              |  | Dimensionless | Switch turns on scenario for SSP 5-8.5.                                                                                                                                                                                                                                                                                                                                                                                 |  |
| SSP585_TEMPERATURE_PROJECTIONS | <p>GRAPH(TIME) Points: (2014.00, 26.890), (2015.00, 27.110), (2016.00, 27.200), (2017.00, 27.260), (2018.00, 27.230), (2019.00, 26.980), (2020.00, 27.210), (2021.00, 27.270), (2022.00, 27.190), (2023.00, 27.280), (2024.00, 27.280), (2025.00, 27.290), (2026.00, 27.450), (2027.00, 27.430), (2028.00, 27.520), (2029.00, 27.410), (2030.00, 27.470), (2031.00, 27.580), (2032.00, 27.400), (2033.00, 27.340), (2034.00, 27.520), (2035.00, 27.730), (2036.00, 27.680), (2037.00, 27.570), (2038.00, 27.820), (2039.00, 28.000), (2040.00, 28.040), (2041.00, 27.810), (2042.00, 27.840), (2043.00, 28.110), (2044.00, 28.220), (2045.00, 28.190), (2046.00, 27.900), (2047.00, 28.060), (2048.00, 28.320), (2049.00, 28.210), (2050.00, 28.060), (2051.00, 28.270), (2052.00, 28.190), (2053.00, 28.310), (2054.00, 28.260), (2055.00, 28.350), (2056.00, 28.380), (2057.00, 28.620), (2058.00, 28.680), (2059.00, 28.790), (2060.00, 28.590), (2061.00, 28.830), (2062.00, 28.810), (2063.00, 28.750), (2064.00, 28.870), (2065.00, 28.900), (2066.00, 29.020), (2067.00, 29.020), (2068.00, 28.890), (2069.00, 29.140), (2070.00, 29.250), (2071.00, 29.300), (2072.00, 29.240), (2073.00, 29.300), (2074.00, 29.560), (2075.00, 29.310), (2076.00, 29.570), (2077.00, 29.320), (2078.00, 29.500), (2079.00, 29.520), (2080.00, 29.680), (2081.00, 29.750), (2082.00, 29.870), (2083.00, 29.810), (2084.00, 29.700), (2085.00, 30.050), (2086.00, 29.940), (2087.00, 30.080), (2088.00, 29.970), (2089.00, 29.950), (2090.00, 30.290), (2091.00, 30.260), (2092.00, 30.090), (2093.00, 30.240), (2094.00, 30.420), (2095.00, 30.250), (2096.00, 30.540), (2097.00, 30.470), (2098.00, 30.460), (2099.00, 30.470), (2100.00, 30.490)</p> |  | Degrees C     | <p>Data for projected temperature is from the World Bank Climate Knowledge Portal (Table: 'Projected Average Mean Surface Air Temperature Kiribati; (Ref. Period:1995-2014), Multi-Model Ensemble').</p> <p>Source:<br/><a href="https://climateknowledgeportal.worldbank.org/country/kiribati/climate-data-projections">https://climateknowledgeportal.worldbank.org/country/kiribati/climate-data-projections</a></p> |  |



|                                            |                                                                                                                                                                                                                                                                                                                                                                                                                                                                                                                                                                                                   |                                             |                        |                                                                                                                                                                                                                                                                                                                                                |              |
|--------------------------------------------|---------------------------------------------------------------------------------------------------------------------------------------------------------------------------------------------------------------------------------------------------------------------------------------------------------------------------------------------------------------------------------------------------------------------------------------------------------------------------------------------------------------------------------------------------------------------------------------------------|---------------------------------------------|------------------------|------------------------------------------------------------------------------------------------------------------------------------------------------------------------------------------------------------------------------------------------------------------------------------------------------------------------------------------------|--------------|
| Population_in_Outer_Islands(t)             | $\text{Population\_in\_Outer\_Islands}(t - dt) + (\text{outer\_islands\_births} + \text{S\_Tarawa\_to\_outer\_islands\_flow} - \text{outer\_islands\_to\_S\_Tarawa\_flow} - \text{outer\_islands\_deaths} - \text{"out-migration\_from\_the\_outer\_islands"}) * dt$                                                                                                                                                                                                                                                                                                                              | INIT<br>Population_in_Outer_Islands = 46995 | people                 | Initial population for outer islands was calculated from the 'Total' population (72,335) minus the population of South Tarawa (25,380) for the year 1990 = 46,955 people.<br><br>Source: Kiribati Census Atlas 2022                                                                                                                            | NON-NEGATIVE |
| Population_in_Tarawa(t)                    | $\text{Population\_in\_Tarawa}(t - dt) + (\text{births} + \text{outer\_islands\_to\_S\_Tarawa\_flow} - \text{deaths} - \text{"out-migration\_from\_S\_Tarawa"} - \text{S\_Tarawa\_to\_outer\_islands\_flow}) * dt$                                                                                                                                                                                                                                                                                                                                                                                | INIT<br>Population_in_Tarawa = 25380        | people                 | The census count for South Tarawa in 1990 was 25380 people.<br><br>Source: Kiribati Census Atlas 2022                                                                                                                                                                                                                                          | NON-NEGATIVE |
| births                                     | $\text{Population\_in\_Tarawa} * \text{Tarawa.birthrate\_in\_Tarawa}$                                                                                                                                                                                                                                                                                                                                                                                                                                                                                                                             |                                             | people/Years           | This flow represents the birth rate for South Tarawa.                                                                                                                                                                                                                                                                                          |              |
| deaths                                     | $\text{Population\_in\_Tarawa} * \text{REFERENCE\_DEATH\_RATE}$                                                                                                                                                                                                                                                                                                                                                                                                                                                                                                                                   | OUTFLOW<br>PRIORITY: 1                      | people/Years           | This flow represents the death rate for South Tarawa.                                                                                                                                                                                                                                                                                          |              |
| "out-migration_from_S_Tarawa"              | $\text{Population\_in\_Tarawa} * \text{Utility\_Functions.probability\_of\_moving\_abroad\_from\_S\_Tarawa}$                                                                                                                                                                                                                                                                                                                                                                                                                                                                                      | OUTFLOW<br>PRIORITY: 2                      | people/Years           | This flow represents the rate of people moving abroad from South Tarawa.                                                                                                                                                                                                                                                                       |              |
| "out-migration_from_the_outer_islands"     | $(\text{Population\_in\_Outer\_Islands} * \text{Utility\_Functions.probability\_of\_moving\_abroad\_from\_outer\_islands})$                                                                                                                                                                                                                                                                                                                                                                                                                                                                       | OUTFLOW<br>PRIORITY: 3                      | people/Years           | This flow represents the rate of people moving abroad from the outer islands.                                                                                                                                                                                                                                                                  |              |
| outer_islands_births                       | $\text{Population\_in\_Outer\_Islands} * \text{birthrate\_in\_outer\_islands}$                                                                                                                                                                                                                                                                                                                                                                                                                                                                                                                    |                                             | people/Years           | This flow represents the birth rate for the outer islands.                                                                                                                                                                                                                                                                                     |              |
| outer_islands_deaths                       | $\text{Population\_in\_Outer\_Islands} * \text{REFERENCE\_DEATH\_RATE}$                                                                                                                                                                                                                                                                                                                                                                                                                                                                                                                           | OUTFLOW<br>PRIORITY: 2                      | people/Years           | This flow represents the death rate for the outer islands.                                                                                                                                                                                                                                                                                     |              |
| outer_islands_to_S_Tarawa_flow             | $(\text{Population\_in\_Outer\_Islands} * \text{Utility\_Functions.probability\_of\_moving\_to\_S\_Tarawa\_from\_outer\_islands})$                                                                                                                                                                                                                                                                                                                                                                                                                                                                | OUTFLOW<br>PRIORITY: 1                      | people/Years           | The flow represents the rate of people from the outer islands moving to South Tarawa.                                                                                                                                                                                                                                                          |              |
| S_Tarawa_to_outer_islands_flow             | $(\text{Population\_in\_Tarawa} * \text{Utility\_Functions.probability\_of\_moving\_to\_the\_outer\_islands\_from\_S\_Tarawa})$                                                                                                                                                                                                                                                                                                                                                                                                                                                                   | OUTFLOW<br>PRIORITY: 3                      | people/Years           | The flow represents the rate of people from South Tarawa moving to the outer islands.                                                                                                                                                                                                                                                          | UNIFLOW      |
| birthrate_in_outer_islands                 | $\text{NATIONAL\_BIRTHRATE} / 1000$                                                                                                                                                                                                                                                                                                                                                                                                                                                                                                                                                               |                                             | people/(people * year) | Birthrate is divided by 1000 to account for the historical crude birthrate of 1 birth per 1000 people.                                                                                                                                                                                                                                         |              |
| NATIONAL_BIRTHRATE                         | $30000000 * \text{EXP}(-0.007 * \text{TIME})$                                                                                                                                                                                                                                                                                                                                                                                                                                                                                                                                                     |                                             | people/(people * year) | Data is available for crude birthrates at a national level for Kiribati. A logarithmic trend line was used to fit Kiribati birthrate data from 1960-2022.<br><br>Source:<br><a href="https://data.worldbank.org/indicator/SP.DYN.CBRT.IN?locations=KI">https://data.worldbank.org/indicator/SP.DYN.CBRT.IN?locations=KI</a>                    |              |
| REFERENCE_DEATH_RATE                       | 0.007                                                                                                                                                                                                                                                                                                                                                                                                                                                                                                                                                                                             |                                             | people/(people* year)  | Average deathrate calculated from 1990-2021 is 7 deaths/ 1000 people. Deathrate is divided by 1000 to account for the historical crude deathrate of 1 death per 1000 people.<br><br>Source:<br><a href="https://data.worldbank.org/indicator/SP.DYN.CDRT.IN?locations=KI">https://data.worldbank.org/indicator/SP.DYN.CDRT.IN?locations=KI</a> |              |
| International:                             |                                                                                                                                                                                                                                                                                                                                                                                                                                                                                                                                                                                                   |                                             |                        |                                                                                                                                                                                                                                                                                                                                                |              |
| "I-Kiribati_Abroad"(t)                     | $\text{"I-Kiribati\_Abroad"}(t - dt) + (- \text{migration\_from\_Kiribati}) * dt$                                                                                                                                                                                                                                                                                                                                                                                                                                                                                                                 | INIT "I-Kiribati_Abroad" = 5000             | people                 | This stock represents the number of I-Kiribati who have moved abroad. This is outside the model boundary.                                                                                                                                                                                                                                      |              |
| migration_from_Kiribati                    | Demographics."out-migration_from_S_Tarawa"+Demographics."out-migration_from_the_outer_islands"                                                                                                                                                                                                                                                                                                                                                                                                                                                                                                    |                                             | people/Years           | This flow represents the rate of people moving abroad from Kiribati (both from South Tarawa and the outer islands). This flow is only included for comparison to historic data.                                                                                                                                                                |              |
| Outer_islands:                             |                                                                                                                                                                                                                                                                                                                                                                                                                                                                                                                                                                                                   |                                             |                        |                                                                                                                                                                                                                                                                                                                                                |              |
| Land_in_Outer_Islands(t)                   | $\text{Land\_in\_Outer\_Islands}(t - dt) + (\text{land\_expansion} - \text{land\_loss}) * dt$                                                                                                                                                                                                                                                                                                                                                                                                                                                                                                     | INIT<br>Land_in_Outer_Islands = 326         | sq km                  | Calculated from total land area minus land areas of South Tarawa and Kiritmati (Table 5 of Kiribati Census Atlas 2022).                                                                                                                                                                                                                        |              |
| land_expansion                             | $\text{Land\_in\_Outer\_Islands} * \text{Tarawa.ACCRETION\_RATE}$                                                                                                                                                                                                                                                                                                                                                                                                                                                                                                                                 |                                             | sq km/year             | Land expansion in the outer islands only includes natural accretion. No reclamation is considered.                                                                                                                                                                                                                                             |              |
| land_loss                                  | $\text{Land\_in\_Outer\_Islands} * (\text{Climate\_Impacts.function\_for\_effect\_of\_sea\_level\_rise\_on\_land\_loss} + \text{Tarawa.EROSION\_RATE})$                                                                                                                                                                                                                                                                                                                                                                                                                                           |                                             | sq km / year           | Land loss is calculated from erosion rates as well as anticipated exacerbation of land loss from sea level rise.                                                                                                                                                                                                                               |              |
| avg_per_capita_income_in_the_outer_islands | IF Climate_Impacts.SSP119_SWITCH = 1 THEN<br>SSP119_CLIMATE_EFFECTS_ON_INCOME_IN_OUTER_ISLANDS<br>ELSE ( IF Climate_Impacts.SSP126_SWITCH = 1 THEN<br>SSP126_CLIMATE_EFFECTS_ON_INCOME_IN_OUTER_ISLANDS<br>ELSE ( IF Climate_Impacts.SSP245_SWITCH = 1 THEN<br>SSP245_CLIMATE_EFFECTS_ON_INCOME_IN_OUTER_ISLANDS<br>ELSE ( IF Climate_Impacts.SSP370_SWITCH = 1 THEN<br>SSP370_CLIMATE_EFFECTS_ON_INCOME_IN_OUTER_ISLANDS<br>ELSE ( IF Climate_Impacts.SSP585_SWITCH = 1 THEN<br>SSP585_CLIMATE_EFFECTS_ON_INCOME_IN_OUTER_ISLANDS<br>ELSE<br>NO_CLIMATE_EFFECTS_ON_INCOME_IN_OUTER_ISLANDS)))))) |                                             | Dimensionless          | Average per capita household income based on estimated relationships for each SSP.                                                                                                                                                                                                                                                             |              |

|                                                                                         |                                                                                                                                                                                                                                                                                                      |  |                         |                                                                                                                                                                                                                                                                                                                                                  |  |
|-----------------------------------------------------------------------------------------|------------------------------------------------------------------------------------------------------------------------------------------------------------------------------------------------------------------------------------------------------------------------------------------------------|--|-------------------------|--------------------------------------------------------------------------------------------------------------------------------------------------------------------------------------------------------------------------------------------------------------------------------------------------------------------------------------------------|--|
| BASE_EMOTIONAL_COST_OF_MOVEMENT_ABROAD                                                  | 50940.34349                                                                                                                                                                                                                                                                                          |  | Dimensionless           | Base emotional cost of moving abroad is calculated through a calibration optimization of population movement. This value represents the emotional cost of leaving home (ancestral lands), especially relevant in the Pacific where place attachment is high.                                                                                     |  |
| BASE_EMOTIONAL_COST_OF_MOVEMENT_INTERNAL                                                | 49194.57802                                                                                                                                                                                                                                                                                          |  | Dimensionless           | Base emotional cost of internal movement is calculated through a calibration optimization of population movement. This value represents the emotional cost of leaving home (ancestral lands), especially relevant in the Pacific where place attachment is high.                                                                                 |  |
| effect_of_funding_on_quality_of_infrastructure_and_services                             | GRAPH(government_funding_to_outer_islands//INIT(government_funding_to_outer_islands)) Points: (0.000, 0.000), (0.200, 0.5073), (0.400, 0.8946), (0.600, 1.190), (0.800, 1.416), (1.000, 1.588), (1.200, 1.720), (1.400, 1.820), (1.600, 1.897), (1.800, 1.955), (2.000, 2.000)                       |  | Dimensionless           | The relationship of infrastructure and services quality to funding was based on the researcher's judgement.                                                                                                                                                                                                                                      |  |
| effect_of_infrastructure_and_social_service_quality_on_outer_islands_and_attractiveness | GRAPH(infrastructure_and_social_services_quality // IDEAL_INFRASTRUCTURE_AND_SOCIAL_SERVICES_QUALITY) Points: (0.000, 0.000), (0.100, 0.2277), (0.200, 0.4089), (0.300, 0.5529), (0.400, 0.6675), (0.500, 0.7586), (0.600, 0.8311), (0.700, 0.8887), (0.800, 0.9345), (0.900, 0.971), (1.000, 1.000) |  | Dimensionless           | This relationship represents how the attractiveness of being (staying) in the outer islands is affected by the infrastructure and social services quality. The relationship assumes that there is not a 1:1 ratio of service quality to attractiveness.                                                                                          |  |
| effect_of_land_loss_on_emotional_cost                                                   | (1-((INIT(Land_in_Outer_Islands)-Land_in_Outer_Islands)/INIT(Land_in_Outer_Islands)))                                                                                                                                                                                                                |  | Dimensionless           | The effect of land loss on emotional cost relationship assumed that the emotional cost of movement will decrease as land is lost.                                                                                                                                                                                                                |  |
| effect_of_land_loss_on_infrastructure                                                   | GRAPH(Land_in_Outer_Islands//INITIAL_LAND_OUTER_ISLANDS) Points: (0.000, 0.000), (0.100, 0.3352), (0.200, 0.5601), (0.300, 0.7111), (0.400, 0.8123), (0.500, 0.8803), (0.600, 0.9259), (0.700, 0.9565), (0.800, 0.977), (0.900, 0.9908), (1.000, 1.000)                                              |  | Dimensionless           | This relationship assumes that not all land lost will have been occupied by infrastructure in the outer islands.<br><br>Effect of land loss is on the total loss of the infrastructure.                                                                                                                                                          |  |
| effect_of_land_loss_on_outer_islands_and_attractiveness                                 | GRAPH(Land_in_Outer_Islands//INITIAL_LAND_OUTER_ISLANDS) Points: (0.000, 0.000), (0.100, 0.124), (0.200, 0.2419), (0.300, 0.354), (0.400, 0.4607), (0.500, 0.5622), (0.600, 0.6587), (0.700, 0.7505), (0.800, 0.832), (0.900, 0.921), (1.000, 1.000)                                                 |  | Dimensionless           | This estimated relationship represents how the attractiveness of staying (being) in the outer islands declines as land is lost.                                                                                                                                                                                                                  |  |
| government_funding_to_outer_islands                                                     | Demographics.Population_in_Outer_Islands*Finances.GOVNT_FUNDING_PER_CAPITA_IN_OUTER_ISLANDS                                                                                                                                                                                                          |  | Australian Dollars/Year | Total funding to the outer islands is the per capita funding times the dynamic population.                                                                                                                                                                                                                                                       |  |
| IDEAL_INFRASTRUCTURE_AND_SOCIAL_SERVICES_QUALITY                                        | 1                                                                                                                                                                                                                                                                                                    |  | Dimensionless           | Assumed ideal infrastructure and social service quality of 1.                                                                                                                                                                                                                                                                                    |  |
| IDEAL_WATER_ACCESS                                                                      | 1                                                                                                                                                                                                                                                                                                    |  | Dimensionless           | Ideal water access would be 100% (value of 1).                                                                                                                                                                                                                                                                                                   |  |
| infrastructure_and_social_services_quality                                              | ((0.7)*effect_of_funding_on_quality_of_infrastructure_and_services +(0.3)*effect_of_land_loss_on_infrastructure)*REFERENCE_INFRASTRUCTURE_AND_SOCIAL_SERVICES_QUALITY                                                                                                                                |  | Dimensionless           | The reference infrastructure and social services quality in the outer islands is dynamically affected by government funding to the outer islands and effects of climate change on service quality. These contributions were weighted through researcher judgment to reflect a higher influence of funding on service and infrastructure quality. |  |
| INITIAL_LAND_OUTER_ISLANDS                                                              | 326                                                                                                                                                                                                                                                                                                  |  | sq km                   | Calculated from total land area minus land areas of South Tarawa and Kiritmati (Table 5 of Kiribati Census Atlas 2022).                                                                                                                                                                                                                          |  |
| NO_CLIMATE_EFFECTS_ON_INCOME_IN_OUTER_ISLANDS                                           | GRAPH(TIME) Points: (1990.0, 500), (2000.0, 1000), (2006.0, 1324), (2019.0, 2593), (2030.0, 3250), (2040.0, 3920), (2050.0, 4350), (2060.0, 4760), (2070.0, 5140), (2080.0, 5510), (2090.0, 5800), (2100.0, 6000)                                                                                    |  | Dimensionless           | Relationship estimated from discussions of climate change's anticipated effect on income in the outer islands. Historic income in the outer islands was used for 2006 (\$1,324AUD) and 2019 (\$2,593AUD).<br><br>Source: 2006 (Table 3.3) and 2019 (Table 139) Kiribati Household Income and Expenditures Survey                                 |  |
| REFERENCE_INFRASTRUCTURE_AND_SOCIAL_SERVICES_QUALITY                                    | 0.2                                                                                                                                                                                                                                                                                                  |  | Dimensionless           | A value of 0.20 was estimated from discussions with local partners. A low reference value reflects lack of development in the outer islands.                                                                                                                                                                                                     |  |
| REFERENCE_WATER_AVAILABILITY_IN_OUTER_ISLANDS                                           | 0.7                                                                                                                                                                                                                                                                                                  |  | Dimensionless           | This reference value was estimated from discussions with local partners.                                                                                                                                                                                                                                                                         |  |
| SSP119_CLIMATE_EFFECTS_ON_INCOME_IN_OUTER_ISLANDS                                       | GRAPH(TIME) Points: (1990.0, 500), (2000.0, 1000), (2006.0, 1324), (2019.0, 2593), (2030.0, 3730), (2040.0, 4210), (2050.0, 4540), (2060.0, 4740), (2070.0, 4890), (2080.0, 5000), (2090.0, 5000), (2100.0, 5000)                                                                                    |  | Dimensionless           | Relationship estimated from discussions of climate change's anticipated effect on income in the outer islands. Historic income in the outer islands was used for 2006 (\$1,324AUD) and 2019 (\$2,593AUD).                                                                                                                                        |  |

|                                                                       |                                                                                                                                                                                                                                                                          |  |                   |                                                                                                                                                                                                                                                                                                                                                                                                                                                                                                                    |  |
|-----------------------------------------------------------------------|--------------------------------------------------------------------------------------------------------------------------------------------------------------------------------------------------------------------------------------------------------------------------|--|-------------------|--------------------------------------------------------------------------------------------------------------------------------------------------------------------------------------------------------------------------------------------------------------------------------------------------------------------------------------------------------------------------------------------------------------------------------------------------------------------------------------------------------------------|--|
|                                                                       | (2100.0, 5000)                                                                                                                                                                                                                                                           |  |                   | Source: 2006 (Table 3.3) and 2019 (Table 139)<br>Kiribati Household Income and Expenditures Survey                                                                                                                                                                                                                                                                                                                                                                                                                 |  |
| SSP119_CLIMATE_EFFECTS_ON<br>_WATER_AVAILABILITY_IN_OUT<br>ER_ISLANDS | GRAPH(TIME) Points: (1990.0, 1.000), (2002.22222222, 0.9444),<br>(2014.44444444, 0.8889), (2026.66666667, 0.8333),<br>(2038.88888889, 0.7778), (2051.11111111, 0.7222),<br>(2063.33333333, 0.6667), (2075.55555556, 0.6111),<br>(2087.77777778, 0.5556), (2100.0, 0.500) |  | Dimensio<br>nless | The relationship shown matches trends anticipated from discussants with local partners. These trends do not match the IPCC projections for future rainfall for the country. For this relationship, local knowledge and expertise was used.<br><br>However, these downward trends do not necessarily apply to all outer islands. Some outer islands receive sufficient rainfall to meet needs. This trend shows the most extreme water cases in the outer islands to show the highest range potential for movement. |  |
| SSP126_CLIMATE_EFFECTS_ON<br>_INCOME_IN_OUTER_ISLANDS                 | GRAPH(TIME) Points: (1990.0, 500), (2000.0, 1000), (2006.0, 1324),<br>(2019.0, 2593), (2030.0, 3100), (2040.0, 3530), (2050.0, 3850),<br>(2060.0, 4170), (2070.0, 4420), (2080.0, 4500), (2090.0, 4610),<br>(2100.0, 4610)                                               |  | Dimensio<br>nless | Relationship estimated from discussions of climate change's anticipated effect on income in the outer islands. Historic income in the outer islands was used for 2006 (\$1,324AUD) and 2019 (\$2,593AUD).<br><br>Source: 2006 (Table 3.3) and 2019 (Table 139)<br>Kiribati Household Income and Expenditures Survey                                                                                                                                                                                                |  |
| SSP126_CLIMATE_EFFECTS_ON<br>_WATER_AVAILABILITY_IN_OUT<br>ER_ISLANDS | GRAPH(TIME) Points: (1990.0, 1.000), (2002.22222222, 0.9389),<br>(2014.44444444, 0.8778), (2026.66666667, 0.8167),<br>(2038.88888889, 0.7556), (2051.11111111, 0.6944),<br>(2063.33333333, 0.6333), (2075.55555556, 0.5722),<br>(2087.77777778, 0.5111), (2100.0, 0.450) |  | Dimensio<br>nless | The relationship shown matches trends anticipated from discussants with local partners. These trends do not match the IPCC projections for future rainfall for the country. For this relationship, local knowledge and expertise was used.<br><br>However, these downward trends do not necessarily apply to all outer islands. Some outer islands receive sufficient rainfall to meet needs. This trend shows the most extreme water cases in the outer islands to show the highest range potential for movement. |  |
| SSP245_CLIMATE_EFFECTS_ON<br>_INCOME_IN_OUTER_ISLANDS                 | GRAPH(TIME) Points: (1990.0, 500), (2000.0, 1000), (2006.0, 1324),<br>(2019.0, 2593), (2030.0, 3230), (2040.0, 3400), (2050.0, 3530),<br>(2060.0, 3640), (2070.0, 3730), (2080.0, 3820), (2090.0, 3920),<br>(2100.0, 3950)                                               |  | Dimensio<br>nless | Relationship estimated from discussions of climate change's anticipated effect on income in the outer islands. Historic income in the outer islands was used for 2006 (\$1,324AUD) and 2019 (\$2,593AUD).<br><br>Source: 2006 (Table 3.3) and 2019 (Table 139)<br>Kiribati Household Income and Expenditures Survey                                                                                                                                                                                                |  |

|                                                                       |                                                                                                                                                                                                                                                                        |  |                   |                                                                                                                                                                                                                                                                                                                                                                                                                                                                                                                    |  |
|-----------------------------------------------------------------------|------------------------------------------------------------------------------------------------------------------------------------------------------------------------------------------------------------------------------------------------------------------------|--|-------------------|--------------------------------------------------------------------------------------------------------------------------------------------------------------------------------------------------------------------------------------------------------------------------------------------------------------------------------------------------------------------------------------------------------------------------------------------------------------------------------------------------------------------|--|
| SSP245_CLIMATE_EFFECTS_ON<br>_WATER_AVAILABILITY_IN_OUT<br>ER_ISLANDS | GRAPH(TIME) Points: (1990.0, 1.000), (2002.22222222, 0.9333),<br>(2014.44444444, 0.8667), (2026.66666667, 0.800),<br>(2038.88888889, 0.7333), (2051.11111111, 0.6667),<br>(2063.33333333, 0.600), (2075.55555556, 0.5333),<br>(2087.77777778, 0.4667), (2100.0, 0.400) |  | Dimensio<br>nless | The relationship shown matches trends anticipated from discussants with local partners. These trends do not match the IPCC projections for future rainfall for the country. For this relationship, local knowledge and expertise was used.<br><br>However, these downward trends do not necessarily apply to all outer islands. Some outer islands receive sufficient rainfall to meet needs. This trend shows the most extreme water cases in the outer islands to show the highest range potential for movement. |  |
| SSP370_CLIMATE_EFFECTS_ON<br>_INCOME_IN_OUTER_ISLANDS                 | GRAPH(TIME) Points: (1990.0, 500), (2000.0, 1000), (2006.0, 1324),<br>(2019.0, 2593), (2030.0, 3020), (2040.0, 3260), (2050.0, 3400),<br>(2060.0, 3510), (2070.0, 3560), (2080.0, 3570), (2090.0, 3570),<br>(2100.0, 3590)                                             |  | Dimensio<br>nless | Relationship estimated from discussions of climate change's anticipated effect on income in the outer islands. Historic income in the outer islands was used for 2006 (\$1,324AUD) and 2019 (\$2,593AUD).<br><br>Source: 2006 (Table 3.3) and 2019 (Table 139)<br>Kiribati Household Income and Expenditures Survey                                                                                                                                                                                                |  |

|                                                               |                                                                                                                                                                                                                                                                                                                                                                                                                                                                                                                                                                                                                               |                                   |               |                                                                                                                                                                                                                                                                                                                                                                                                                                                                                                                           |              |
|---------------------------------------------------------------|-------------------------------------------------------------------------------------------------------------------------------------------------------------------------------------------------------------------------------------------------------------------------------------------------------------------------------------------------------------------------------------------------------------------------------------------------------------------------------------------------------------------------------------------------------------------------------------------------------------------------------|-----------------------------------|---------------|---------------------------------------------------------------------------------------------------------------------------------------------------------------------------------------------------------------------------------------------------------------------------------------------------------------------------------------------------------------------------------------------------------------------------------------------------------------------------------------------------------------------------|--------------|
| SSP370_CLIMATE_EFFECTS_ON_WATER_AVAILABILITY_IN_OUTER_ISLANDS | GRAPH(TIME) Points: (1990.0, 1.000), (2002.22222222, 0.9278), (2014.44444444, 0.8556), (2026.66666667, 0.7833), (2038.88888889, 0.7111), (2051.11111111, 0.6389), (2063.33333333, 0.5667), (2075.55555556, 0.4944), (2087.77777778, 0.4222), (2100.0, 0.350)                                                                                                                                                                                                                                                                                                                                                                  |                                   | Dimensionless | <p>The relationship shown matches trends anticipated from discussants with local partners. These trends do not match the IPCC projections for future rainfall for the country. For this relationship, local knowledge and expertise was used.</p> <p>However, these downward trends do not necessarily apply to all outer islands. Some outer islands receive sufficient rainfall to meet needs. This trend shows the most extreme water cases in the outer islands to show the highest range potential for movement.</p> |              |
| SSP585_CLIMATE_EFFECTS_ON_INCOME_IN_OUTER_ISLANDS             | GRAPH(TIME) Points: (1990.0, 500), (2000.0, 1000), (2006.0, 1324), (2019.0, 2593), (2030.0, 2960), (2040.0, 3100), (2050.0, 3270), (2060.0, 3350), (2070.0, 3350), (2080.0, 3370), (2090.0, 3370), (2100.0, 3350)                                                                                                                                                                                                                                                                                                                                                                                                             |                                   | Dimensionless | <p>Relationship estimated from discussions of climate change's anticipated effect on income in the outer islands. Historic income in the outer islands was used for 2006 (\$1,324AUD) and 2019 (\$2,593AUD).</p> <p>Source: 2006 (Table 3.3) and 2019 (Table 139) Kiribati Household Income and Expenditures Survey</p>                                                                                                                                                                                                   |              |
| SSP585_CLIMATE_EFFECTS_ON_WATER_AVAILABILITY_IN_OUTER_ISLANDS | GRAPH(TIME) Points: (1990.0, 1.000), (2002.22222222, 0.9222), (2014.44444444, 0.8444), (2026.66666667, 0.7667), (2038.88888889, 0.6889), (2051.11111111, 0.6111), (2063.33333333, 0.5333), (2075.55555556, 0.4556), (2087.77777778, 0.3778), (2100.0, 0.300)                                                                                                                                                                                                                                                                                                                                                                  |                                   | Dimensionless | <p>The relationship shown matches trends anticipated from discussants with local partners. These trends do not match the IPCC projections for future rainfall for the country. For this relationship, local knowledge and expertise was used.</p> <p>However, these downward trends do not necessarily apply to all outer islands. Some outer islands receive sufficient rainfall to meet needs. This trend shows the most extreme water cases in the outer islands to show the highest range potential for movement.</p> |              |
| total_emotional_cost_of_movement_abroad                       | BASE_EMOTIONAL_COST_OF_MOVEMENT_ABROAD*effect_of_land_loss_on_emotional_cost                                                                                                                                                                                                                                                                                                                                                                                                                                                                                                                                                  |                                   | Dimensionless | The total emotional cost of movement abroad accounts for the base emotional cost and the effect that land loss may have had on it.                                                                                                                                                                                                                                                                                                                                                                                        |              |
| total_emotional_cost_of_movement_internal                     | BASE_EMOTIONAL_COST_OF_MOVEMENT_INTERNAL*effect_of_land_loss_on_emotional_cost                                                                                                                                                                                                                                                                                                                                                                                                                                                                                                                                                |                                   | Dimensionless | The total emotional cost of internal movement accounts for the base emotional cost and the effect that land loss may have had on it.                                                                                                                                                                                                                                                                                                                                                                                      |              |
| water_adequacy_ratio                                          | water_availability_in_outer_islands/IDEAL_WATER_ACCESS                                                                                                                                                                                                                                                                                                                                                                                                                                                                                                                                                                        |                                   | Dimensionless | Water adequacy is the amount that is available divided by the ideal amount.                                                                                                                                                                                                                                                                                                                                                                                                                                               |              |
| water_availability_in_outer_islands                           | REFERENCE_WATER_AVAILABILITY_IN_OUTER_ISLANDS* IF Climate_Impacts.SSP119_SWITCH = 1 THEN SSP119_CLIMATE_EFFECTS_ON_WATER_AVAILABILITY_IN_OUTER_ISLANDS ELSE ( IF Climate_Impacts.SSP126_SWITCH = 1 THEN SSP126_CLIMATE_EFFECTS_ON_WATER_AVAILABILITY_IN_OUTER_ISLANDS ELSE ( IF Climate_Impacts.SSP245_SWITCH = 1 THEN SSP245_CLIMATE_EFFECTS_ON_WATER_AVAILABILITY_IN_OUTER_ISLANDS ELSE ( IF Climate_Impacts.SSP370_SWITCH = 1 THEN SSP370_CLIMATE_EFFECTS_ON_WATER_AVAILABILITY_IN_OUTER_ISLANDS ELSE ( IF Climate_Impacts.SSP585_SWITCH = 1 THEN SSP585_CLIMATE_EFFECTS_ON_WATER_AVAILABILITY_IN_OUTER_ISLANDS ELSE 1)))) |                                   | Dimensionless | Water availability in the outer islands based on estimated relationships for each SSP.                                                                                                                                                                                                                                                                                                                                                                                                                                    |              |
| Tarawa:                                                       |                                                                                                                                                                                                                                                                                                                                                                                                                                                                                                                                                                                                                               |                                   |               |                                                                                                                                                                                                                                                                                                                                                                                                                                                                                                                           |              |
| Housing_Units(t)                                              | Housing_Units(t - dt) + (housing_development - houses_lost) * dt                                                                                                                                                                                                                                                                                                                                                                                                                                                                                                                                                              | INIT Housing_Units = 2786         | housing unit  | <p>Based on a linear trendline from household counts in 2005, 2010, 2015, and 2022 there was an estimated 1692 households in 1990.</p> <p>Source: Kiribati 2006 Household Income and Expenditures Report</p>                                                                                                                                                                                                                                                                                                              | NON-NEGATIVE |
| Land_Area(t)                                                  | Land_Area(t - dt) + (land_expansion - land_loss) * dt                                                                                                                                                                                                                                                                                                                                                                                                                                                                                                                                                                         | INIT Land_Area = 11.8             | sq km         | <p>South Tarawa land area values for 1968 and 1998 were interpolated to find the estimated land area in 1990.</p> <p>Source: Table 3 Summary of area changes for the two areas, and the entire atoll, over the 30-year period (1968–1998) Biribo &amp; Woodroffe (2013)</p>                                                                                                                                                                                                                                               |              |
| Residential_Land_Area(t)                                      | Residential_Land_Area(t - dt) + (developing_residential_land - residential_land_loss) * dt                                                                                                                                                                                                                                                                                                                                                                                                                                                                                                                                    | INIT Residential_Land_Area = 5.17 | sq km         | Map areas for residential land were calculated from pdf measurement tool using the 2017 National Government Land Use Plan.                                                                                                                                                                                                                                                                                                                                                                                                |              |

|                                        |                                                                                                                                                                      |                                     |                        |                                                                                                                                                                                                                                                                                                                                                                                                                                                                                                                                                                                                                                                                                                               |              |
|----------------------------------------|----------------------------------------------------------------------------------------------------------------------------------------------------------------------|-------------------------------------|------------------------|---------------------------------------------------------------------------------------------------------------------------------------------------------------------------------------------------------------------------------------------------------------------------------------------------------------------------------------------------------------------------------------------------------------------------------------------------------------------------------------------------------------------------------------------------------------------------------------------------------------------------------------------------------------------------------------------------------------|--------------|
| Undeveloped_Land_Area(t)               | Undeveloped_Land_Area(t - dt) + (gaining_undeveloped_land - loss_of_open_land - developing_open_land) * dt                                                           | INIT<br>Undeveloped_Land_Area = 0.2 | sq km                  | Map areas for undeveloped land were calculated from pdf measurement tool using the 2017 National Government Land Use Plan.                                                                                                                                                                                                                                                                                                                                                                                                                                                                                                                                                                                    | NON-NEGATIVE |
| developing_open_land                   | housing_development/(HOUSING_BUILDING_PER_PROPERTY/HOUSE_FOOTPRINT_FOR_NEW_BUILDS*SQ_M_TO_SQ_KM_CONVERSION* IF SWITCH_HOUSING_LEVELS = 1 THEN HOUSING_LEVELS ELSE 1) | OUTFLOW<br>PRIORITY: 2              | sq km / year           | Development of open land is based on housing development.                                                                                                                                                                                                                                                                                                                                                                                                                                                                                                                                                                                                                                                     |              |
| developing_residential_land            | developing_open_land                                                                                                                                                 |                                     | sq km/year             | As open land development is currently only based on housing development, this value is also used as the amount of land added for residential land area.                                                                                                                                                                                                                                                                                                                                                                                                                                                                                                                                                       |              |
| gaining_undeveloped_land               | land_expansion*PERCENT_OF_NEW_LAND_THAT_CAN_BE_DEVELOPED+(HOUSING_BUILDING_OUT_OF_USE_RATE/(HOUSING_BUILDING_PER_PROPERTY*PROPERTY_SIZE))                            |                                     | sq km/year             | New undeveloped land comes from land expansion and land where buildings are destroyed.                                                                                                                                                                                                                                                                                                                                                                                                                                                                                                                                                                                                                        |              |
| houses_lost                            | (HOUSING_BUILDING_OUT_OF_USE_RATE+housing_building_lost_to_SLR)* IF SWITCH_HOUSING_LEVELS = 1 THEN HOUSING_LEVELS ELSE 1                                             |                                     | housing unit / years   | Five houses are estimated to be lost per year from damage. Additional house loss from from loss of land.                                                                                                                                                                                                                                                                                                                                                                                                                                                                                                                                                                                                      |              |
| housing_development                    | ( "AVG_HOUSING_DEVELOPMENT_RATE"* IF SWITCH_HOUSING_LEVELS = 1 THEN HOUSING_LEVELS ELSE 1) + housing_units_needed_for_new_people                                     |                                     | housing unit / years   | The housing development rate is calculated from the average housing development rate plus the units needed to accommodate new people in South Tarawa.<br><br>New housing development can be built upward in multistory housing if policy option is turned on.                                                                                                                                                                                                                                                                                                                                                                                                                                                 |              |
| land_expansion                         | SMTH1((ACCRETION_RATE*Land_Area)+RECLAMATION_RATE, 10)                                                                                                               |                                     | sq km/Years            | Total new land from both reclaimed land and natural accretion.                                                                                                                                                                                                                                                                                                                                                                                                                                                                                                                                                                                                                                                |              |
| land_loss                              | Land_Area*(Climate_Impacts.function_for_effect_of_sea_level_rise_on_land_loss+EROSION_RATE)                                                                          |                                     | sq km/Years            | Land loss is calculated from erosion rates as well as anticipated exacerbation of land loss from sea level rise.                                                                                                                                                                                                                                                                                                                                                                                                                                                                                                                                                                                              |              |
| loss_of_open_land                      | land_loss*percent_of_land_area_undeveloped                                                                                                                           | OUTFLOW<br>PRIORITY: 1              | sq km / year           | Land loss to undeveloped area from erosion and sea level rise is assumed to be proportional to percent of undeveloped land to total land area.                                                                                                                                                                                                                                                                                                                                                                                                                                                                                                                                                                |              |
| residential_land_loss                  | land_loss*percent_of_residential_land_area                                                                                                                           |                                     | sq km/year             | Land loss to residential land area from erosion and sea level rise is assumed to be proportional to percent of residential land to total land area.                                                                                                                                                                                                                                                                                                                                                                                                                                                                                                                                                           |              |
| "AVG_HOUSING_DEVELOPMENT_RATE"         | 39.89720007                                                                                                                                                          |                                     | housing building/ year | This rate was calculated through a calibration optimization of household density.                                                                                                                                                                                                                                                                                                                                                                                                                                                                                                                                                                                                                             |              |
| "AVG_LIFE_EXPECTANCY"                  | 65                                                                                                                                                                   |                                     | years                  | Average life expectancy was calculated as the mean life expectancy between 1990-2021.<br><br>Source:<br><a href="https://data.worldbank.org/indicator/SP.DYN.LE00.IN?end=2021&amp;locations=KI&amp;start=1990">https://data.worldbank.org/indicator/SP.DYN.LE00.IN?end=2021&amp;locations=KI&amp;start=1990</a>                                                                                                                                                                                                                                                                                                                                                                                               |              |
| "PERCENT_OF_POP_WOMEN"                 | 0.52                                                                                                                                                                 |                                     | women / people         | Source: Kiribati Census Atlas 2022                                                                                                                                                                                                                                                                                                                                                                                                                                                                                                                                                                                                                                                                            |              |
| "population_density_in_S_Tarawa"       | Demographics.Population_in_Tarawa//Land_Area                                                                                                                         |                                     | People/Kilometers ^2   | Population density is calculated from the population in South Tarawa divided by the total land area.                                                                                                                                                                                                                                                                                                                                                                                                                                                                                                                                                                                                          |              |
| "REF_PERCENT_MOVING_IN_WITH_FAMILY"    | 0.210064222                                                                                                                                                          |                                     | Dimensionless          | This value was calculated through a calibration optimization of household density.                                                                                                                                                                                                                                                                                                                                                                                                                                                                                                                                                                                                                            |              |
| ACCRETION_RATE                         | 0.001                                                                                                                                                                |                                     | 1 / years              | Table 9 of Biribo & Woodroffe et al. (2013) provides the percent accretion for 8 measurement locations in South Tarawa, for both their lagoon and ocean sides. The average of both lagoon and ocean sides were taken for each location, then all 8 locations were averaged. Table 6 of the same study indicates that only 11% of accretion is natural (as opposed to reclamation). As reclamation is separated in this model, only 11% of the accretion rate from Table 9 was used.<br><br>Overall, there was calculated to be a 3% accretion of land area over the period of 1968-1998. This value was divided by 30 to calculate accretion per year (0.105%/year).<br><br>Source: Biribo & Woodroffe (2013) |              |
| BASE_EMOTIONAL_COST_OF_MOVEMENT_ABROAD | 50951.82163                                                                                                                                                          |                                     | Dimensionless          | Base emotional cost of moving abroad is calculated through a calibration optimization of population movement. This value represents the emotional cost of leaving home (ancestral lands), especially relevant in the Pacific where place attachment is high.                                                                                                                                                                                                                                                                                                                                                                                                                                                  |              |

|                                                                  |                                                                                                                                                                                                                                                                                                                                                                     |  |                         |                                                                                                                                                                                                                                                                                                                                                                                                                                                                                                                                                                                                                                                                                                                                                                                                                                                           |  |
|------------------------------------------------------------------|---------------------------------------------------------------------------------------------------------------------------------------------------------------------------------------------------------------------------------------------------------------------------------------------------------------------------------------------------------------------|--|-------------------------|-----------------------------------------------------------------------------------------------------------------------------------------------------------------------------------------------------------------------------------------------------------------------------------------------------------------------------------------------------------------------------------------------------------------------------------------------------------------------------------------------------------------------------------------------------------------------------------------------------------------------------------------------------------------------------------------------------------------------------------------------------------------------------------------------------------------------------------------------------------|--|
| BASE_EMOTIONAL_COST_OF_MOVEMENT_INTERNAL                         | 49196.2986                                                                                                                                                                                                                                                                                                                                                          |  | Dimensionless           | Base emotional cost of internal movement is calculated through a calibration optimization of population movement. This value represents the emotional cost of leaving home (ancestral lands), especially relevant in the Pacific where place attachment is high.                                                                                                                                                                                                                                                                                                                                                                                                                                                                                                                                                                                          |  |
| birthrate_in_Tarawa                                              | (LOOKUP(FERTILITY_BY_POPULATION_DENSITY, ("population_density_in_S_Tarawa")))*"PERCENT_OF_POP_WOMEN"/"AVG_LIFE_EXPECTANCY"                                                                                                                                                                                                                                          |  | people / (people* year) | The fertility rate is based on the relationship with the population density. As fertility rate is expressed as births/woman, it is multiplied by the sex ratio in South Tarawa and divided by the life expectancy.                                                                                                                                                                                                                                                                                                                                                                                                                                                                                                                                                                                                                                        |  |
| effect_of_land_loss_on_emotional_cost                            | $1 - ((\text{INIT}(\text{Land\_Area}) - \text{Land\_Area}) / \text{INIT}(\text{Land\_Area}))$                                                                                                                                                                                                                                                                       |  | Dimensionless           | The effect of land loss on emotional cost relationship assumed that the emotional cost of movement will decrease as land is lost.                                                                                                                                                                                                                                                                                                                                                                                                                                                                                                                                                                                                                                                                                                                         |  |
| effect_of_land_loss_on_S_Tarawa_attractiveness                   | GRAPH(Land_Area//INIT(Land_Area)) Points: (0.000, 0.000), (0.100, 0.124), (0.200, 0.2419), (0.300, 0.354), (0.400, 0.4607), (0.500, 0.5622), (0.600, 0.6587), (0.700, 0.7505), (0.800, 0.832), (0.900, 0.921), (1.000, 1.000)                                                                                                                                       |  | Dimensionless           | This estimated relationship represents how the attractiveness of staying (being) in South Tarawa declines as land is lost.                                                                                                                                                                                                                                                                                                                                                                                                                                                                                                                                                                                                                                                                                                                                |  |
| effect_variable_of_land_availability_on_moving_in_with_family    | -0.014507824                                                                                                                                                                                                                                                                                                                                                        |  | Dimensionless           | This value was calculated through a calibration optimization of household density.                                                                                                                                                                                                                                                                                                                                                                                                                                                                                                                                                                                                                                                                                                                                                                        |  |
| EROSION_RATE                                                     | 0.00457                                                                                                                                                                                                                                                                                                                                                             |  | 1/ year                 | <p>Table 9 of Biribo &amp; Woodroffe et al. (2013) provides the percent erosion for 8 measurement locations in South Tarawa, for both their lagoon and ocean sides. The average of both lagoon and ocean sides were taken for each location, then all 8 locations were averaged.</p> <p>Overall, there was calculated to be a 14% erosion of land area over the period of 1968-1998. This value was divided by 30 to calculate the erosion per year (0.457%/year).</p>                                                                                                                                                                                                                                                                                                                                                                                    |  |
| FERTILITY_BY_POPULATION_DENSITY                                  | GRAPH("population_density_in_S_Tarawa"//INIT("population_density_in_S_Tarawa")) Points: (380, 6.781), (709.272727273, 6.040), (1038.54545455, 4.997), (1367.81818182, 5.100), (1697.09090909, 4.920), (2026.36363636, 4.701), (2355.63636364, 4.411), (2684.90909091, 4.103), (3014.18181818, 3.928), (3343.45454545, 3.843), (3672.72727273, 3.706), (4002, 3.300) |  | people/ (women)         | <p>Rotella et al. (2021) provides data on the relationship between national population density and national fertility rates. National fertility rates provided here were assumed to apply similarly to South Tarawa, though population density was much higher in the same time period. This graphical converter shows the national fertility rates per population density in South Tarawa. Population density in South Tarawa was calculated from national census data. The time period for this data is 1963-2020.</p> <p>Sources:</p> <p>Fertility data: Rotella A, Varnum MEW, Sng O, Grossmann I. Increasing population densities predict decreasing fertility rates over time: A 174-nation investigation. Am Psychol. 2021 Sep;76(6):933-946. doi: 10.1037/amp0000862. PMID: 34914431.</p> <p>Population density data: Historical Census Data.</p> |  |
| function_of_effect_of_land_availability_on_moving_in_with_family | $(\text{Undeveloped\_Land\_Area} / \text{INITIAL\_OPEN\_LAND}) * \text{effect\_variable\_of\_land\_availability\_on\_moving\_in\_with\_family} + y\_axis$                                                                                                                                                                                                           |  | Dimensionless           | Function represents linear relationship between open land area and the percent of people moving in with family where x is the change in land availability and the slope and y intercept were calibrated to historic household data.                                                                                                                                                                                                                                                                                                                                                                                                                                                                                                                                                                                                                       |  |
| FUTURE_RECLAMATION_RATE                                          | 0                                                                                                                                                                                                                                                                                                                                                                   |  | sq km/ years            | This variable is included for future policy analysis. It is currently set at 0 to show the effects of no future reclamation.                                                                                                                                                                                                                                                                                                                                                                                                                                                                                                                                                                                                                                                                                                                              |  |
| HISTORIC_RECLAMATION_RATE                                        | 0.222366614                                                                                                                                                                                                                                                                                                                                                         |  | sq km/ year             | Rate calibrated to match current land area (15.76 sqkm).                                                                                                                                                                                                                                                                                                                                                                                                                                                                                                                                                                                                                                                                                                                                                                                                  |  |
| HOUSE_FOOTPRINT_FOR_NEW_BUILDS                                   | 70                                                                                                                                                                                                                                                                                                                                                                  |  | sq m / property         | <p>Gives footprint of concrete (80 sq m) and timber (60 sq m) in Fiji. Average of 70 sq m is used. Fiji can be used as a proximate for Kiribati housing structure.</p> <p>This assumes that new builds have no space in their property outside of the dimensions of their house.</p> <p>Source: 'UNDP Pacific Housing Guide 2023'.</p>                                                                                                                                                                                                                                                                                                                                                                                                                                                                                                                    |  |
| household_density_for_new_migrants                               | 4.394004541                                                                                                                                                                                                                                                                                                                                                         |  | people/ housing unit    | This density was calculated through a calibration optimization of household density.                                                                                                                                                                                                                                                                                                                                                                                                                                                                                                                                                                                                                                                                                                                                                                      |  |

|                                             |                                                                                                         |  |                                 |                                                                                                                                                                                                                                                                                             |  |
|---------------------------------------------|---------------------------------------------------------------------------------------------------------|--|---------------------------------|---------------------------------------------------------------------------------------------------------------------------------------------------------------------------------------------------------------------------------------------------------------------------------------------|--|
| housing_building_lost_to_SLR                | residential_land_loss*PROPERTY_SIZE*HOUSING_BUILDING_PER_PROPERTY                                       |  | housing building/Year           | Calculation of how many housing buildings would be lost to sea level rise based on residential land loss.                                                                                                                                                                                   |  |
| HOUSING_BUILDING_OUT_OF_USE_RATE            | 26.19129499                                                                                             |  | housing building / year         | This out of use rate was calculated through a calibration optimization of household density.                                                                                                                                                                                                |  |
| HOUSING_BUILDING_PER_PROPERTY               | 1                                                                                                       |  | housing building/property       | There value indicated there is 1 housing building per property.                                                                                                                                                                                                                             |  |
| HOUSING_LEVELS                              | 3                                                                                                       |  | housing unit / housing building | Housing levels represent the number of stories a housing building could have. This value is used to indicate the number of units in a building, assuming one unit per level.                                                                                                                |  |
| housing_units_needed_for_new_people         | new_people_to_Tarawa/household_density_for_new_migrants*(1-percent_of_new_people_moving_in_with_family) |  | housing unit / year             | Housing units needed calculated from the new people in South Tarawa divided by the household density for new people times the percentage that are likely to move into their own housing (100% minus the percent moving in with family).                                                     |  |
| INITIAL_OPEN_LAND                           | 0.222636758                                                                                             |  | sq km                           | Map areas were calculated from pdf measurement tool using the 2017 National Government Land Use Plan.<br>Same value as initial for 'Undeveloped Land Area'.                                                                                                                                 |  |
| new_people_to_Tarawa                        | Demographics.births+Demographics.outer_islands_to_S_Tarawa_flow                                         |  | people/years                    | New people to Tarawa are calculated from births and in-migration.                                                                                                                                                                                                                           |  |
| overall_household_density_in_Tarawa         | Demographics.Population_in_Tarawa/Housing_Units                                                         |  | people/housing unit             | Household density calculated as population in South Tarawa divided by the housing units.                                                                                                                                                                                                    |  |
| percent_of_land_area_undeveloped            | Undeveloped_Land_Area/Land_Area                                                                         |  | Dimensionless                   | Calculated from the amount of undeveloped land area and the total land area.                                                                                                                                                                                                                |  |
| PERCENT_OF_NEW_LAND_THAT_CAN_BE_DEVELOPED   | 0.237370083                                                                                             |  | Dimensionless                   | This value was calculated through a calibration optimization of household density.<br>It is assumed that not all new land added can be developed on. For example, shoreline accretion may only add minimal amounts to existing property.                                                    |  |
| percent_of_new_people_moving_in_with_family | ("REF_PERCENT_MOVING_IN_WITH_FAMILY"*function_of_effect_of_land_availability_on_moving_in_with_family)  |  | Dimensionless                   | This function represents the amount of people that will choose to move in with family based on the available land.                                                                                                                                                                          |  |
| percent_of_residential_land_area            | Residential_Land_Area//Land_Area                                                                        |  | Dimensionless                   | Calculated from the amount of residential land area and the total land area.                                                                                                                                                                                                                |  |
| PROPERTY_SIZE                               | 540                                                                                                     |  | property /sq km                 | The initial values for housing units (2786 houses) and residential land (5.17 sq km) at time 0 were used to find the average square area per household land (0.001856 sq km / house). Using this value, it is estimated that 540 houses would be lost per 1 sq km of residential land lost. |  |
| RECLAMATION_RATE                            | (IF TIME < year_reclamation_tapered THEN HISTORIC_RECLAMATION_RATE ELSE FUTURE_RECLAMATION_RATE)        |  | sq km/years                     | Total net area by reclamation (363sq km from 1968-1998) was divided by 30 to find reclamation rate per year.<br>Reclamation rate per year= 0.12 sqkm/year.<br><br>Source: Biribo & Woodroffe (2013)                                                                                         |  |
| S_Tarawa_household_sufficiency              | MIN(1, 1/(overall_household_density_in_Tarawa/INIT(overall_household_density_in_Tarawa)))               |  | Dimensionless                   | Household sufficiency function represents relationship where the sufficiency decreases as the household density rises above the initial value. The sufficiency is capped at 1.                                                                                                              |  |
| SQ_M_TO_SQ_KM_CONVERSION                    | 1000000                                                                                                 |  | sq m / sq km                    | Conversion of sq m to sq km.                                                                                                                                                                                                                                                                |  |
| SWITCH_HOUSING_LEVELS                       | 0                                                                                                       |  | Dimensionless                   | Switch turns on policy scenario of multi-story housing.<br>This is turned off as most housing is currently one level.                                                                                                                                                                       |  |
| total_emotional_cost_of_movement_abroad     | BASE_EMOTIONAL_COST_OF_MOVEMENT_ABROAD*effect_of_land_loss_on_emotional_cost                            |  | Dimensionless                   | The total emotional cost of movement abroad accounts for the base emotional cost and the effect that land loss may have had on it.                                                                                                                                                          |  |
| total_emotional_cost_of_movement_internal   | BASE_EMOTIONAL_COST_OF_MOVEMENT_INTERNAL*effect_of_land_loss_on_emotional_cost                          |  | Dimensionless                   | The total emotional cost of internal movement accounts for the base emotional cost and the effect that land loss may have had on it.                                                                                                                                                        |  |
| y_axis                                      | 2.209161737                                                                                             |  | Dimensionless                   | This value was calculated through a calibration optimization of household density.                                                                                                                                                                                                          |  |
| year_reclamation_tapered                    | 2008                                                                                                    |  | year                            | This year was chosen as it is the last year of shoreline analysis in the latest study (Duvat, 2013).                                                                                                                                                                                        |  |
| Utility_Functions:                          |                                                                                                         |  |                                 |                                                                                                                                                                                                                                                                                             |  |

|                                                          |                                                                                                                                                                                                                                                                                                                                                                                                                                                                                                                                                                                                                                                                                                                                                                                                                                                                                                                                                                                                                       |  |                   |                                                                                                                                                                                                                                                                                                                                                           |  |
|----------------------------------------------------------|-----------------------------------------------------------------------------------------------------------------------------------------------------------------------------------------------------------------------------------------------------------------------------------------------------------------------------------------------------------------------------------------------------------------------------------------------------------------------------------------------------------------------------------------------------------------------------------------------------------------------------------------------------------------------------------------------------------------------------------------------------------------------------------------------------------------------------------------------------------------------------------------------------------------------------------------------------------------------------------------------------------------------|--|-------------------|-----------------------------------------------------------------------------------------------------------------------------------------------------------------------------------------------------------------------------------------------------------------------------------------------------------------------------------------------------------|--|
| alpha_MOVING_ABROAD_FROM_KIRIBATI                        | 0                                                                                                                                                                                                                                                                                                                                                                                                                                                                                                                                                                                                                                                                                                                                                                                                                                                                                                                                                                                                                     |  | Dimensionless     | Alpha value was calculated through calibration optimisation to historic population values.                                                                                                                                                                                                                                                                |  |
| alpha_MOVING_TO_OUTER_ISLANDS_FROM_S_TARAWA              | 9.349392108                                                                                                                                                                                                                                                                                                                                                                                                                                                                                                                                                                                                                                                                                                                                                                                                                                                                                                                                                                                                           |  | Dimensionless     | Alpha value was calculated through calibration optimisation to historic population values.                                                                                                                                                                                                                                                                |  |
| alpha_MOVING_TO_S_TARAWA_FROM_OUTER_ISLANDS              | 0.043625133                                                                                                                                                                                                                                                                                                                                                                                                                                                                                                                                                                                                                                                                                                                                                                                                                                                                                                                                                                                                           |  | Dimensionless     | Alpha value was calculated through calibration optimisation to historic population values.                                                                                                                                                                                                                                                                |  |
| COST_SCALING                                             | 10000                                                                                                                                                                                                                                                                                                                                                                                                                                                                                                                                                                                                                                                                                                                                                                                                                                                                                                                                                                                                                 |  | Dimensionless     |                                                                                                                                                                                                                                                                                                                                                           |  |
| DECISION_TIME_STEP                                       | 1                                                                                                                                                                                                                                                                                                                                                                                                                                                                                                                                                                                                                                                                                                                                                                                                                                                                                                                                                                                                                     |  | year              | Decision time step of 1 year set to match the evaluation time step of the model.                                                                                                                                                                                                                                                                          |  |
| FOOD_ADEQUACY_ABROAD                                     | 1                                                                                                                                                                                                                                                                                                                                                                                                                                                                                                                                                                                                                                                                                                                                                                                                                                                                                                                                                                                                                     |  | Dimensionless     | The adequacy of resources and services abroad was set to 1 to represent a high comparison point.                                                                                                                                                                                                                                                          |  |
| INFRASTRUCTURE_AND_SERVICES_PERCEPTION_ABROAD            | 1                                                                                                                                                                                                                                                                                                                                                                                                                                                                                                                                                                                                                                                                                                                                                                                                                                                                                                                                                                                                                     |  | Dimensionless     | The adequacy of resources and services abroad was set to 1 to represent a high comparison point.                                                                                                                                                                                                                                                          |  |
| MEDIAN_ANNUAL_PERSON_INCOME_ABROAD                       | 45351                                                                                                                                                                                                                                                                                                                                                                                                                                                                                                                                                                                                                                                                                                                                                                                                                                                                                                                                                                                                                 |  | AUD/(people*year) | Australia data was used as a proxy for "international".<br>The median annual personal income for migrants was \$45,351 in 2019-2020.<br><br>Source: <a href="https://www.abs.gov.au/media-centre/media-releases/new-migrant-jobs-and-income-data-release">https://www.abs.gov.au/media-centre/media-releases/new-migrant-jobs-and-income-data-release</a> |  |
| PERCEIVED_LAND_ADEQUACY                                  | 1                                                                                                                                                                                                                                                                                                                                                                                                                                                                                                                                                                                                                                                                                                                                                                                                                                                                                                                                                                                                                     |  | Dimensionless     | The adequacy of resources and services abroad was set to 1 to represent a high comparison point.                                                                                                                                                                                                                                                          |  |
| PERCEIVED_WATER_ADEQUACY_ABROAD                          | 1                                                                                                                                                                                                                                                                                                                                                                                                                                                                                                                                                                                                                                                                                                                                                                                                                                                                                                                                                                                                                     |  | Dimensionless     | The adequacy of resources and services abroad was set to 1 to represent a high comparison point.                                                                                                                                                                                                                                                          |  |
| probability_of_moving_abroad_from_outer_islands          | $(\text{EXP}(\text{utility\_of\_moving\_abroad\_from\_outer\_islands})/(\text{EXP}(\text{utility\_of\_moving\_abroad\_from\_outer\_islands})+\text{EXP}(\text{utility\_of\_moving\_to\_S\_Tarawa})+\text{EXP}(\text{utility\_of\_staying\_in\_outer\_islands}))))/\text{DECISION\_TIME\_STEP}$                                                                                                                                                                                                                                                                                                                                                                                                                                                                                                                                                                                                                                                                                                                        |  | 1/ year           | The probability of option selection was calculated using a multinomial logit function.                                                                                                                                                                                                                                                                    |  |
| probability_of_moving_abroad_from_S_Tarawa               | $((\text{EXP}(\text{utility\_of\_moving\_abroad\_from\_S\_Tarawa})/(\text{EXP}(\text{utility\_of\_moving\_abroad\_from\_S\_Tarawa})+\text{EXP}(\text{utility\_of\_staying\_in\_S\_Tarawa})+\text{EXP}(\text{utility\_of\_moving\_to\_the\_outer\_islands}))))/\text{DECISION\_TIME\_STEP}$                                                                                                                                                                                                                                                                                                                                                                                                                                                                                                                                                                                                                                                                                                                            |  | 1 / year          | The probability of option selection was calculated using a multinomial logit function.                                                                                                                                                                                                                                                                    |  |
| probability_of_moving_to_S_Tarawa_from_outer_islands     | $((\text{EXP}(\text{utility\_of\_moving\_to\_S\_Tarawa})/(\text{EXP}(\text{utility\_of\_moving\_abroad\_from\_outer\_islands})+\text{EXP}(\text{utility\_of\_moving\_to\_S\_Tarawa})+\text{EXP}(\text{utility\_of\_staying\_in\_outer\_islands}))))/\text{DECISION\_TIME\_STEP}$                                                                                                                                                                                                                                                                                                                                                                                                                                                                                                                                                                                                                                                                                                                                      |  | 1 / year          | The probability of option selection was calculated using a multinomial logit function.                                                                                                                                                                                                                                                                    |  |
| probability_of_moving_to_the_outer_islands_from_S_Tarawa | $(\text{EXP}(\text{utility\_of\_moving\_to\_the\_outer\_islands})/(\text{EXP}(\text{utility\_of\_moving\_abroad\_from\_S\_Tarawa})+\text{EXP}(\text{utility\_of\_staying\_in\_S\_Tarawa})+\text{EXP}(\text{utility\_of\_moving\_to\_the\_outer\_islands}))))/\text{DECISION\_TIME\_STEP}$                                                                                                                                                                                                                                                                                                                                                                                                                                                                                                                                                                                                                                                                                                                             |  | 1/year            | The probability of option selection was calculated using a multinomial logit function.                                                                                                                                                                                                                                                                    |  |
| probability_of_staying_in_outer_islands                  | $(\text{EXP}(\text{utility\_of\_staying\_in\_outer\_islands})/(\text{EXP}(\text{utility\_of\_moving\_abroad\_from\_outer\_islands})+\text{EXP}(\text{utility\_of\_moving\_to\_S\_Tarawa})+\text{EXP}(\text{utility\_of\_staying\_in\_outer\_islands}))))/\text{DECISION\_TIME\_STEP}$                                                                                                                                                                                                                                                                                                                                                                                                                                                                                                                                                                                                                                                                                                                                 |  | 1/ year           | The probability of option selection was calculated using a multinomial logit function.                                                                                                                                                                                                                                                                    |  |
| probability_of_staying_in_S_Tarawa                       | $(\text{EXP}(\text{utility\_of\_staying\_in\_S\_Tarawa})/(\text{EXP}(\text{utility\_of\_moving\_abroad\_from\_S\_Tarawa})+\text{EXP}(\text{utility\_of\_staying\_in\_S\_Tarawa})+\text{EXP}(\text{utility\_of\_moving\_to\_the\_outer\_islands}))))/\text{DECISION\_TIME\_STEP}$                                                                                                                                                                                                                                                                                                                                                                                                                                                                                                                                                                                                                                                                                                                                      |  | 1/ year           | The probability of option selection was calculated using a multinomial logit function.                                                                                                                                                                                                                                                                    |  |
| utility_of_moving_abroad_from_outer_islands              | $\text{WEIGHT\_OF\_INFRASTRUCTURE}*\text{LN}(\text{INFRASTRUCTURE\_AND\_SERVICES\_PERCEPTION\_ABROAD}/\text{Outer\_Islands.effect\_of\_infrastructure\_and\_social\_service\_quality\_on\_outer\_island\_attractiveness})+$<br>$\text{WEIGHT\_OF\_WATER\_SECURITY}*\text{LN}(\text{PERCEIVED\_WATER\_ADEQUACY\_ABROAD}/\text{Outer\_Islands.water\_adequacy\_ratio})+$<br>$\text{WEIGHT\_OF\_LAND\_AVAILABILITY}*\text{LN}(\text{PERCEIVED\_LAND\_ADEQUACY}/\text{Outer\_Islands.effect\_of\_land\_loss\_on\_outer\_island\_attractiveness})+$<br>$\text{WEIGHT\_OF\_FOOD\_SECURITY}*\text{LN}(\text{FOOD\_ADEQUACY\_ABROAD}/\text{Food.total\_food\_stock\_adequacy\_Outer\_Islands})+$<br>$\text{WEIGHT\_OF\_FINANCIAL\_SECURITY}*\text{LN}(\text{MEDIAN\_ANNUAL\_PERSON\_INCOME\_ABROAD}/\text{Outer\_Islands.avg\_per\_capita\_income\_in\_the\_outer\_islands})-$<br>$\text{Finances.total\_cost\_of\_movement\_from\_Outer\_Islands\_abroad}/\text{COST\_SCALING}-\text{alpha\_MOVING\_ABROAD\_FROM\_KIRIBATI}$ |  | Dimensionless     | Calculated through additive utility function with terms related to the Habitability Pillars for atolls framework where each pillar is weighted according to local prioritisation.                                                                                                                                                                         |  |



|                                        |                                                                                                                                                                                                                                                                                                                                                                                                                                                                                                                                                                                                                                                                                                                                                                                                                                                                                                                                                                                                                                                                                                                                                                    |  |               |                                                                                                                                                                                   |  |
|----------------------------------------|--------------------------------------------------------------------------------------------------------------------------------------------------------------------------------------------------------------------------------------------------------------------------------------------------------------------------------------------------------------------------------------------------------------------------------------------------------------------------------------------------------------------------------------------------------------------------------------------------------------------------------------------------------------------------------------------------------------------------------------------------------------------------------------------------------------------------------------------------------------------------------------------------------------------------------------------------------------------------------------------------------------------------------------------------------------------------------------------------------------------------------------------------------------------|--|---------------|-----------------------------------------------------------------------------------------------------------------------------------------------------------------------------------|--|
| utility_of_moving_abroad_from_S_Tarawa | $\begin{aligned} & \text{WEIGHT\_OF\_INFRASTRUCTURE} * \text{LN}(\text{INFRASTRUCTURE\_AND\_SERVICES\_PERCEPTION\_ABROAD} / \text{Tarawa.S\_Tarawa\_household\_sufficiency}) + \\ & \text{WEIGHT\_OF\_WATER\_SECURITY} * \text{LN}(\text{PERCEIVED\_WATER\_ADEQUACY\_ABROAD} / \text{Water\_Resources.water\_adequacy\_ratio}) + \\ & \text{WEIGHT\_OF\_LAND\_AVAILABILITY} * \text{LN}(\text{PERCEIVED\_LAND\_ADEQUACY} / \text{Tarawa.effect\_of\_land\_loss\_on\_S\_Tarawa\_attractiveness}) + \\ & \text{WEIGHT\_OF\_FOOD\_SECURITY} * \text{LN}(\text{FOOD\_ADEQUACY\_ABROAD} / \text{Food.total\_food\_stock\_adequacy\_S\_Tarawa}) + \\ & \text{WEIGHT\_OF\_FINANCIAL\_SECURITY} * \text{LN}(\text{MEDIAN\_ANNUAL\_PERSON\_INCOME\_ABROAD} / \text{Finances.income\_in\_S\_Tarawa\_per\_capita}) - \\ & \text{Finances.total\_cost\_of\_movement\_from\_S\_Tarawa\_abroad} / \text{COST\_SCALING} - \alpha_{\text{MOVING\_ABROAD\_FROM\_KIRIBATI}} \end{aligned}$                                                                                                                                                                                           |  | Dimensionless | Calculated through additive utility function with terms related to the Habitability Pillars for atolls framework where each pillar is weighted according to local prioritisation. |  |
| utility_of_moving_to_S_Tarawa          | $\begin{aligned} & \text{WEIGHT\_OF\_INFRASTRUCTURE} * \text{LN}(\text{Tarawa.S\_Tarawa\_household\_sufficiency} / \text{Outer\_Islands.effect\_of\_infrastructure\_and\_social\_service\_quality\_on\_outer\_island\_attractiveness}) + \\ & \text{WEIGHT\_OF\_WATER\_SECURITY} * \text{LN}(\text{Water\_Resources.water\_adequacy\_ratio} / \text{Outer\_Islands.water\_adequacy\_ratio}) + \\ & \text{WEIGHT\_OF\_LAND\_AVAILABILITY} * \text{LN}(\text{Tarawa.effect\_of\_land\_loss\_on\_S\_Tarawa\_attractiveness} / \text{Outer\_Islands.effect\_of\_land\_loss\_on\_outer\_island\_attractiveness}) + \\ & \text{WEIGHT\_OF\_FOOD\_SECURITY} * \text{LN}(\text{Food.total\_food\_stock\_adequacy\_S\_Tarawa} / \text{Food.total\_food\_stock\_adequacy\_Outer\_Islands}) + \\ & \text{WEIGHT\_OF\_FINANCIAL\_SECURITY} * \text{LN}(\text{Finances.income\_in\_S\_Tarawa\_per\_capita} / \text{Outer\_Islands.avg\_per\_capita\_income\_in\_the\_outer\_islands}) - \\ & \text{Finances.total\_cost\_of\_movement\_from\_Outer\_Islands\_to\_S\_Tarawa} / \text{COST\_SCALING} - \alpha_{\text{MOVING\_TO\_S\_TARAWA\_FROM\_OUTER\_ISLANDS}} \end{aligned}$ |  | Dimensionless | Calculated through additive utility function with terms related to the Habitability Pillars for atolls framework where each pillar is weighted according to local prioritisation. |  |
| utility_of_moving_to_the_outer_islands | $\begin{aligned} & \text{WEIGHT\_OF\_INFRASTRUCTURE} * \text{LN}(\text{Outer\_Islands.effect\_of\_infrastructure\_and\_social\_service\_quality\_on\_outer\_island\_attractiveness} / \text{Tarawa.S\_Tarawa\_household\_sufficiency}) + \\ & \text{WEIGHT\_OF\_WATER\_SECURITY} * \text{LN}(\text{Outer\_Islands.water\_adequacy\_ratio} / \text{Water\_Resources.water\_adequacy\_ratio}) + \\ & \text{WEIGHT\_OF\_LAND\_AVAILABILITY} * \text{LN}(\text{Outer\_Islands.effect\_of\_land\_loss\_on\_outer\_island\_attractiveness} / \text{Tarawa.effect\_of\_land\_loss\_on\_S\_Tarawa\_attractiveness}) + \\ & \text{WEIGHT\_OF\_FOOD\_SECURITY} * \text{LN}(\text{Food.total\_food\_stock\_adequacy\_Outer\_Islands} / \text{Food.total\_food\_stock\_adequacy\_S\_Tarawa}) + \\ & \text{WEIGHT\_OF\_FINANCIAL\_SECURITY} * \text{LN}(\text{Outer\_Islands.avg\_per\_capita\_income\_in\_the\_outer\_islands} / \text{Finances.income\_in\_S\_Tarawa\_per\_capita}) - \\ & \text{Finances.total\_cost\_of\_movement\_from\_S\_Tarawa\_to\_Outer\_Islands} / \text{COST\_SCALING} - \alpha_{\text{MOVING\_TO\_OUTER\_ISLANDS\_FROM\_S\_TARAWA}} \end{aligned}$ |  | Dimensionless | Calculated through additive utility function with terms related to the Habitability Pillars for atolls framework where each pillar is weighted according to local prioritisation. |  |
| utility_of_staying_in_outer_islands    | $\begin{aligned} & \text{WEIGHT\_OF\_FINANCIAL\_SECURITY} * \text{LN}(\text{Outer\_Islands.avg\_per\_capita\_income\_in\_the\_outer\_islands} / \text{INIT}(\text{Outer\_Islands.avg\_per\_capita\_income\_in\_the\_outer\_islands})) + \\ & \text{WEIGHT\_OF\_FOOD\_SECURITY} * \text{LN}(\text{Food.total\_food\_stock\_adequacy\_Outer\_Islands} / \text{INIT}(\text{Food.total\_food\_stock\_adequacy\_Outer\_Islands})) + \\ & \text{WEIGHT\_OF\_LAND\_AVAILABILITY} * \text{LN}(\text{Outer\_Islands.effect\_of\_land\_loss\_on\_outer\_island\_attractiveness} / \text{INIT}(\text{Outer\_Islands.effect\_of\_land\_loss\_on\_outer\_island\_attractiveness})) + \\ & \text{WEIGHT\_OF\_WATER\_SECURITY} * \text{LN}(\text{Outer\_Islands.water\_adequacy\_ratio} / \text{INIT}(\text{Outer\_Islands.water\_adequacy\_ratio})) + \\ & \text{WEIGHT\_OF\_INFRASTRUCTURE} * \text{LN}(\text{Outer\_Islands.effect\_of\_infrastructure\_and\_social\_service\_quality\_on\_outer\_island\_attractiveness} / \text{INIT}(\text{Outer\_Islands.effect\_of\_infrastructure\_and\_social\_service\_quality\_on\_outer\_island\_attractiveness})) \end{aligned}$    |  | Dimensionless | Calculated through additive utility function with terms related to the Habitability Pillars for atolls framework where each pillar is weighted according to local prioritisation. |  |

|                                                         |                                                                                                                                                                                                                                                                                                                                                                                                                                                                                                                                                                                                                                                                                                                                                                                                                                                                                                                                                        |  |                            |                                                                                                                                                                                                                                                                                                                                                                                                                           |  |
|---------------------------------------------------------|--------------------------------------------------------------------------------------------------------------------------------------------------------------------------------------------------------------------------------------------------------------------------------------------------------------------------------------------------------------------------------------------------------------------------------------------------------------------------------------------------------------------------------------------------------------------------------------------------------------------------------------------------------------------------------------------------------------------------------------------------------------------------------------------------------------------------------------------------------------------------------------------------------------------------------------------------------|--|----------------------------|---------------------------------------------------------------------------------------------------------------------------------------------------------------------------------------------------------------------------------------------------------------------------------------------------------------------------------------------------------------------------------------------------------------------------|--|
| utility_of_staying_in_S_Tarawa                          | $\begin{aligned} & \text{WEIGHT\_OF\_INFRASTRUCTURE} * \text{LN}(\text{Tarawa.S\_Tarawa\_household\_sufficiency} // \text{INIT}(\text{Tarawa.S\_Tarawa\_household\_sufficiency})) + \\ & \text{WEIGHT\_OF\_WATER\_SECURITY} * \text{LN}(\text{Water\_Resources.water\_adequacy\_ratio} // \text{INIT}(\text{Water\_Resources.water\_adequacy\_ratio})) + \\ & \text{WEIGHT\_OF\_LAND\_AVAILABILITY} * \text{LN}(\text{Tarawa.effect\_of\_land\_loss\_on\_S\_Tarawa\_attractiveness} // \text{INIT}(\text{Tarawa.effect\_of\_land\_loss\_on\_S\_Tarawa\_attractiveness})) + \\ & \text{WEIGHT\_OF\_FOOD\_SECURITY} * \text{LN}(\text{Food.total\_food\_stock\_adequacy\_S\_Tarawa} // \text{INIT}(\text{Food.total\_food\_stock\_adequacy\_S\_Tarawa})) + \\ & \text{WEIGHT\_OF\_FINANCIAL\_SECURITY} * \text{LN}(\text{Finances.income\_in\_S\_Tarawa\_per\_capita} // \text{INIT}(\text{Finances.income\_in\_S\_Tarawa\_per\_capita})) \end{aligned}$ |  | Dimensionless              | Calculated through additive utility function with terms related to the Habitability Pillars for atolls framework where each pillar is weighted according to local prioritisation.                                                                                                                                                                                                                                         |  |
| WEIGHT_OF_FINANCIAL_SECURITY                            | 0.266                                                                                                                                                                                                                                                                                                                                                                                                                                                                                                                                                                                                                                                                                                                                                                                                                                                                                                                                                  |  | Dimensionless              | Polarity and strength of utility factor connections, relative to other utility factors, were found through focus group data (conducted November 2024 in South Tarawa, Kiribati). Eigenvector centrality scores were calculated for each utility factor then normalized.                                                                                                                                                   |  |
| WEIGHT_OF_FOOD_SECURITY                                 | 0.226                                                                                                                                                                                                                                                                                                                                                                                                                                                                                                                                                                                                                                                                                                                                                                                                                                                                                                                                                  |  | Dimensionless              | Polarity and strength of utility factor connections, relative to other utility factors, were found through focus group data (conducted November 2024 in South Tarawa, Kiribati). Eigenvector centrality scores were calculated for each utility factor then normalized.                                                                                                                                                   |  |
| WEIGHT_OF_INFRASTRUCTURE                                | 0.151                                                                                                                                                                                                                                                                                                                                                                                                                                                                                                                                                                                                                                                                                                                                                                                                                                                                                                                                                  |  | Dimensionless              | Polarity and strength of utility factor connections, relative to other utility factors, were found through focus group data (conducted November 2024 in South Tarawa, Kiribati). Eigenvector centrality scores were calculated for each utility factor then normalized.                                                                                                                                                   |  |
| WEIGHT_OF_LAND_AVAILABILITY                             | 0.151                                                                                                                                                                                                                                                                                                                                                                                                                                                                                                                                                                                                                                                                                                                                                                                                                                                                                                                                                  |  | Dimensionless              | Polarity and strength of utility factor connections, relative to other utility factors, were found through focus group data (conducted November 2024 in South Tarawa, Kiribati). Eigenvector centrality scores were calculated for each utility factor then normalized.                                                                                                                                                   |  |
| WEIGHT_OF_WATER_SECURITY                                | 0.206                                                                                                                                                                                                                                                                                                                                                                                                                                                                                                                                                                                                                                                                                                                                                                                                                                                                                                                                                  |  | Dimensionless              | Polarity and strength of utility factor connections, relative to other utility factors, were found through focus group data (conducted November 2024 in South Tarawa, Kiribati). Eigenvector centrality scores were calculated for each utility factor then normalized.                                                                                                                                                   |  |
| Finances:                                               |                                                                                                                                                                                                                                                                                                                                                                                                                                                                                                                                                                                                                                                                                                                                                                                                                                                                                                                                                        |  |                            |                                                                                                                                                                                                                                                                                                                                                                                                                           |  |
| "GOVERNMENT_FUNDING_PER_CAPITA_IN_S_TARAWA"             | $\text{TOTAL\_GOVT\_FUNDING\_PER\_CAPITA} * \text{DISTRIBUTION\_OF\_FUNDING\_TO\_S\_TARAWA}$                                                                                                                                                                                                                                                                                                                                                                                                                                                                                                                                                                                                                                                                                                                                                                                                                                                           |  | AUD / (people* year)       |                                                                                                                                                                                                                                                                                                                                                                                                                           |  |
| "percent_of_S_Tarawa_engaged_in_sustistence_activities" | $0.041 * \text{effect\_of\_land\_loss\_on\_subsistence\_livelihoods}$                                                                                                                                                                                                                                                                                                                                                                                                                                                                                                                                                                                                                                                                                                                                                                                                                                                                                  |  | house/household use        | The amount of people engaged in subsistence activities will remain the same or decrease based on land loss.<br><br>Sourced from "Percentage of Persons Aged 15+ by Type of Economic Activity and Island Group" (Table 2.4, pg 12). 4.1% of such people in S. Tarawa are reported to engage in subsistence economic activities.                                                                                            |  |
| "total_income_in_S_Tarawa"                              | $(\text{INTERNATIONAL\_REMITTANCES\_PER\_YEAR} + (\text{total\_other\_income} * \text{Demographics.Population\_in\_Tarawa}) + (\text{total\_income\_from\_subsistence}))$                                                                                                                                                                                                                                                                                                                                                                                                                                                                                                                                                                                                                                                                                                                                                                              |  | Australian Dollars/(Years) | Total income in South Tarawa is the combination of remittances, subsistence activity, and other income.                                                                                                                                                                                                                                                                                                                   |  |
| ANNUAL_INCOME_FOR_SUBSISTENCE_ACTIVITY                  | 6226                                                                                                                                                                                                                                                                                                                                                                                                                                                                                                                                                                                                                                                                                                                                                                                                                                                                                                                                                   |  | AUD / (people* year)       | Sourced from "Per capita income by source and Urban/Rural" (Table 3.3, pg. 16) in the Analytical Report on the 2006 Kiribati Household Income and Expenditure Survey<br><br>The total annual income for "Home Produce Sales" (\$1,242,000AUD) and "Subsistence activity" (\$8,782,000AUD) in S. Tarawa was \$10,024,000 in 2006 (Table 3.1., pg. 13). Both of these income activities may take place on residential land. |  |

|                                                       |                                                                                                                                                                                                                                                                                                                           |  |                      |                                                                                                                                                                                                                                                                                                                                                                                                                                                                                                                                                                                                                                                                                                                                                                                                                                                    |  |
|-------------------------------------------------------|---------------------------------------------------------------------------------------------------------------------------------------------------------------------------------------------------------------------------------------------------------------------------------------------------------------------------|--|----------------------|----------------------------------------------------------------------------------------------------------------------------------------------------------------------------------------------------------------------------------------------------------------------------------------------------------------------------------------------------------------------------------------------------------------------------------------------------------------------------------------------------------------------------------------------------------------------------------------------------------------------------------------------------------------------------------------------------------------------------------------------------------------------------------------------------------------------------------------------------|--|
|                                                       |                                                                                                                                                                                                                                                                                                                           |  |                      | The number of people in S Tarawa engaged in subsistence activity is 4.1% (Table 2.4, pg. 12). This equals 1,610 people of the 39,186 total S Tarawa population in 2006 (Table 2.1, pg. 11). Subsistence income per person engaged in subsistence activity = \$10,024,000/1,610 people = \$6,226/ person.                                                                                                                                                                                                                                                                                                                                                                                                                                                                                                                                           |  |
| DISTRIBUTION_OF_FUNDING_TO_S_TARAWA                   | 0.2                                                                                                                                                                                                                                                                                                                       |  | Dimensionless        | The proportion of budget has remained fairly constant from 2008-2018 with ~38%:20%:42% of budget to national:South Tarawa: outer islands.<br><br>Sources:<br>2009 and 2018 National Budgets                                                                                                                                                                                                                                                                                                                                                                                                                                                                                                                                                                                                                                                        |  |
| effect_of_land_loss_on_subsistence_livelihoods        | GRAPH(Tarawa.Residential_Land_Area/(INIT(Tarawa.Residential_Land_Area))) Points: (0.000, 0.000), (0.100, 0.100), (0.200, 0.200), (0.300, 0.300), (0.400, 0.400), (0.500, 0.500), (0.600, 0.600), (0.700, 0.700), (0.800, 0.800), (0.900, 0.900), (1.000, 1.000)                                                           |  | Dimensionless        | This converter estimates a relationship where subsistence livelihoods decrease as land is lost.                                                                                                                                                                                                                                                                                                                                                                                                                                                                                                                                                                                                                                                                                                                                                    |  |
| financial_cost_to_move_abroad                         | 15000                                                                                                                                                                                                                                                                                                                     |  | Dimensionless        | Moving cost (\$15,000 AUD) was estimated from international move website and accounts for visa, flights, shipping, and insurance.<br><a href="https://internationalvanlines.com/how-much-does-it-cost-to-move-to-australia/">https://internationalvanlines.com/how-much-does-it-cost-to-move-to-australia/</a>                                                                                                                                                                                                                                                                                                                                                                                                                                                                                                                                     |  |
| financial_cost_to_move_internally                     | 300                                                                                                                                                                                                                                                                                                                       |  | Dimensionless        | Price estimated from airline cost (~\$200 AUD) from South Tarawa to Tabiteuea South with an additional \$100 AUD estimated for shipping.                                                                                                                                                                                                                                                                                                                                                                                                                                                                                                                                                                                                                                                                                                           |  |
| GOVNT_FUNDING_PER_CAPITA_IN_OUTER_ISLANDS             | TOTAL_GOVNT_FUNDING_PER_CAPITA*(0.62-DISTRIBUTION_OF_FUNDING_TO_S_TARAWA)                                                                                                                                                                                                                                                 |  | AUD / (people* year) | Assuming ~38% of the budget will go to national programs. The funding to the outer islands will be 62 minus the percent to South Tarawa.                                                                                                                                                                                                                                                                                                                                                                                                                                                                                                                                                                                                                                                                                                           |  |
| income_in_S_Tarawa_per_capita                         | "total_income_in_S_Tarawa"/Demographics.Population_in_Tarawa                                                                                                                                                                                                                                                              |  | AUD/ (people* year)  | Per capita income is the total income in South Tarawa divided by the population in a given year.                                                                                                                                                                                                                                                                                                                                                                                                                                                                                                                                                                                                                                                                                                                                                   |  |
| INTERNATIONAL_REMITTANCE_S_PER_YEAR                   | GRAPH(TIME) Points: (1990.0, 500000), (2006.0, 6068000), (2019.0, 15477722), (2045.0, 32600000), (2063.3333333, 45600000), (2081.66666667, 61600000), (2100.0, 75000000)                                                                                                                                                  |  | AUD/ year            | Points were estimated around historic data points of 2006 (\$6,068,000 AUD) and 2019 (\$15,477,722 AUD). These values are total remittances received for South Tarawa.<br><br>Sources: 2006 and 2009 Household Income and Expenditures Report                                                                                                                                                                                                                                                                                                                                                                                                                                                                                                                                                                                                      |  |
| total_cost_of_movement_from_Outer_Islands_abroad      | financial_cost_to_move_abroad+Outer_Islands.total_emotional_cost_of_movement_abroad                                                                                                                                                                                                                                       |  | Dimensionless        | Total cost is the sum of financial and emotional cost.                                                                                                                                                                                                                                                                                                                                                                                                                                                                                                                                                                                                                                                                                                                                                                                             |  |
| total_cost_of_movement_from_Outer_Islands_to_S_Tarawa | financial_cost_to_move_internally+Outer_Islands.total_emotional_cost_of_movement_internal                                                                                                                                                                                                                                 |  | Dimensionless        | Total cost is the sum of financial and emotional cost.                                                                                                                                                                                                                                                                                                                                                                                                                                                                                                                                                                                                                                                                                                                                                                                             |  |
| total_cost_of_movement_from_S_Tarawa_abroad           | financial_cost_to_move_abroad+Tarawa.total_emotional_cost_of_movement_abroad                                                                                                                                                                                                                                              |  | Dimensionless        | Total cost is the sum of financial and emotional cost.                                                                                                                                                                                                                                                                                                                                                                                                                                                                                                                                                                                                                                                                                                                                                                                             |  |
| total_cost_of_movement_from_S_Tarawa_to_Outer_Islands | financial_cost_to_move_internally+Tarawa.total_emotional_cost_of_movement_internal                                                                                                                                                                                                                                        |  | Dimensionless        | Total cost is the sum of financial and emotional cost.                                                                                                                                                                                                                                                                                                                                                                                                                                                                                                                                                                                                                                                                                                                                                                                             |  |
| TOTAL_GOVNT_FUNDING_PER_CAPITA                        | 1000                                                                                                                                                                                                                                                                                                                      |  | AUD / (people* year) | Government funding per capita is based on total expenditure and population. It increased from ~\$740/person in 2008 to ~\$1,390/person in 2018. A value of \$1,000 was used here.                                                                                                                                                                                                                                                                                                                                                                                                                                                                                                                                                                                                                                                                  |  |
| total_income_from_subsistence                         | Demographics.Population_in_Tarawa*ANNUAL_INCOME_FOR_SUBSISTENCE_ACTIVITY*"percent_of_S_Tarawa_engaged_in_subsistence_activities"                                                                                                                                                                                          |  | AUD/ year            | The total income in South Tarawa from subsistence activities is the population times the percentage of people engaged times the per capita annual income for subsistence livelihoods.                                                                                                                                                                                                                                                                                                                                                                                                                                                                                                                                                                                                                                                              |  |
| total_other_income                                    | GRAPH(TIME) Points: (1990.0, 300), (1998.46153846, 800), (2006.0, 1120), (2015.38461538, 1800), (2019.0, 2032), (2032.30769231, 3300), (2040.76923077, 4100), (2049.23076923, 5100), (2057.69230769, 6300), (2066.15384615, 7600), (2074.61538462, 9000), (2083.07692308, 10300), (2091.53846154, 11800), (2100.0, 13500) |  | AUD/ (people* year)  | Total other income for 2006 was calculated from the Per Capita total income (\$1,531 AUD) minus income generated from home produce sales (\$32 AUD), subsistence activity (\$224 AUD), and remittances (\$155 AUD) (Table 3.3, pg. 16 in Household Income and Expenditures report 2006). Total other income was calculated to be \$1,120 AUD per capita in 2006.<br><br>Total other income for 2019 was calculated from the total Average annual per capita income (\$2,915 AUD) (Table 139, pg. 199 in Household Income and Expenditures report 2019) minus Primary industry/activities - composed of home based activities (\$638 per capita per year), Cash gifts, remittances (\$94 per capita per year), and Cash purchased gifts (\$151 per capita per year).<br><br>Total other income was calculated to be \$2,032 AUD per capita in 2019. |  |

|                                            |                                                                                                                                                                                                                                                                                       |      |               |                                                                                                                                                                                                                                                                                                                    |  |
|--------------------------------------------|---------------------------------------------------------------------------------------------------------------------------------------------------------------------------------------------------------------------------------------------------------------------------------------|------|---------------|--------------------------------------------------------------------------------------------------------------------------------------------------------------------------------------------------------------------------------------------------------------------------------------------------------------------|--|
|                                            |                                                                                                                                                                                                                                                                                       |      |               | Other data points were added based on research judgement.                                                                                                                                                                                                                                                          |  |
| Food:                                      |                                                                                                                                                                                                                                                                                       |      |               |                                                                                                                                                                                                                                                                                                                    |  |
| ACCESS_TO_IMPORTED_FOOD_OUTER_ISLANDS      | 0.6                                                                                                                                                                                                                                                                                   |      | Dimensionless | Access to imported food in the outer islands is estimated to be lower than that of South Tarawa.                                                                                                                                                                                                                   |  |
| ACCESS_TO_IMPORTED_FOOD_S_TARAWA           | 1                                                                                                                                                                                                                                                                                     |      | Dimensionless | Access to imported food is estimated to be 100% based on discussions and observations in South Tarawa.                                                                                                                                                                                                             |  |
| effect_of_temp_on_local_food_supply        | GRAPH(Climate_Impacts.PROJECTED_TEMPERATURE//Climate_Impacts.HISTORIC_TEMPERATURE) Points: (1.000, 1.000), (1.100, 0.9973), (1.200, 0.9866), (1.300, 0.9451), (1.400, 0.8055), (1.500, 0.500), (1.600, 0.1945), (1.700, 0.05487), (1.800, 0.01343), (1.900, 0.002742), (2.000, 0.000) |      | Dimensionless | Relationship estimated from researcher and represents the idea that as temperature increases, local farming will become increasingly more difficult. Effect will be multiplied to the local food supply where a low "effect" leads to lower supply.                                                                |  |
| imported_food_stock_Outer_Islands          | REF_FOOD_SECURITY_OUTER_ISLANDS*ACCESS_TO_IMPORTED_FOOD_OUTER_ISLANDS                                                                                                                                                                                                                 |      | food stock    | The imported food supply in the outer islands is calculated from a reference value for food security in the outer islands then adjusted from the estimated accessed to imported food.                                                                                                                              |  |
| imported_food_stock_S_Tarawa               | REF_FOOD_SECURITY_S_TARAWA*ACCESS_TO_IMPORTED_FOOD_S_TARAWA                                                                                                                                                                                                                           |      | food stock    | The imported food supply in South Tarawa is calculated from a reference value for food security in South Tarawa then adjusted from the estimated accessed to imported food.                                                                                                                                        |  |
| local_food_supply_Outer_Islands            | REF_FOOD_SECURITY_OUTER_ISLANDS*effect_of_temp_on_local_food_supply                                                                                                                                                                                                                   |      | food stock    | The local food supply in the outer islands is calculated from a reference value for food security in the outer islands then dynamically updated from the effect of temperature on food production.                                                                                                                 |  |
| local_food_supply_S_Tarawa                 | REF_FOOD_SECURITY_S_TARAWA*effect_of_temp_on_local_food_supply                                                                                                                                                                                                                        |      | food stock    | The local food supply in South Tarawa is calculated from a reference value for food security in South Tarawa then dynamically updated from the effect of temperature on food production.                                                                                                                           |  |
| PREFERENCE_FOR_LOCAL_FOOD_IN_OUTER_ISLANDS | 0.2                                                                                                                                                                                                                                                                                   |      | Dimensionless | Averaged 'share of dietary energy consumed from own production' (Figure 6) from all regions excluding South Tarawa. [value=19.5%]<br><br>FAO 'Food consumption in Kiribati'                                                                                                                                        |  |
| PREFERENCE_FOR_LOCAL_FOOD_IN_S_TARAWA      | 0.05                                                                                                                                                                                                                                                                                  |      | Dimensionless | From 'share of dietary energy consumed from own production' (Figure 6) for South Tarawa. [value=5%]<br><br>FAO 'Food consumption in Kiribati'                                                                                                                                                                      |  |
| REF_FOOD_SECURITY_OUTER_ISLANDS            | 0.71                                                                                                                                                                                                                                                                                  |      | food stock    | 71% of households in the Outer Islands are classified as food secure or mildly food insecure according the the Kiribati 2019/20 Household Income and Expenditures Survey. This value was calculated from the average of all regions excluding South Tarawa.<br><br>(Figure 36 of FAO Food consumption in Kiribati) |  |
| REF_FOOD_SECURITY_S_TARAWA                 | 0.59                                                                                                                                                                                                                                                                                  |      | food stock    | 59% of households in South Tarawa are classified as food secure of mildly food insecure according the the Kiribati 2019/20 Household Income and Expenditures Survey.<br><br>(Figure 36 of FAO Food consumption in Kiribati)                                                                                        |  |
| total_food_stock_adequacy_Outer_Islands    | (1-PREFERENCE_FOR_LOCAL_FOOD_IN_OUTER_ISLANDS)*imported_food_stock_Outer_Islands+(PREFERENCE_FOR_LOCAL_FOOD_IN_OUTER_ISLANDS)*local_food_supply_Outer_Islands                                                                                                                         |      | food stock    | The total food adequacy in the outer islands is the combination of local food and imported food availability.                                                                                                                                                                                                      |  |
| total_food_stock_adequacy_S_Tarawa         | (1-PREFERENCE_FOR_LOCAL_FOOD_IN_S_TARAWA)*imported_food_stock_S_Tarawa+(PREFERENCE_FOR_LOCAL_FOOD_IN_S_TARAWA)*local_food_supply_S_Tarawa                                                                                                                                             |      | food stock    | The total food adequacy in South Tarawa is the combination of local food and imported food availability.                                                                                                                                                                                                           |  |
| Water_Resources:                           |                                                                                                                                                                                                                                                                                       |      |               |                                                                                                                                                                                                                                                                                                                    |  |
|                                            | $Freshwater\ Lens(t - dt) = (groundwater\ recharge - groundwater\ outflow - evapotranspiration) * dt$                                                                                                                                                                                 | INIT |               | Changes to the freshwater lens is based on water balance equation where change in freshwater lens storage (S) = precipitation + groundwater inflow - groundwater outflow - evapotranspiration.<br><br>Runoff was not included in this calculation.                                                                 |  |

|                                                              |                                                                                                                                                                      |                                         |                                 |                                                                                                                                                                                                                                                                                                                                                                                                                                                                                                                                                                                                                                                                                                                                         |  |
|--------------------------------------------------------------|----------------------------------------------------------------------------------------------------------------------------------------------------------------------|-----------------------------------------|---------------------------------|-----------------------------------------------------------------------------------------------------------------------------------------------------------------------------------------------------------------------------------------------------------------------------------------------------------------------------------------------------------------------------------------------------------------------------------------------------------------------------------------------------------------------------------------------------------------------------------------------------------------------------------------------------------------------------------------------------------------------------------------|--|
| Freshwater_Lens(t)                                           | $\text{Freshwater\_Lens}(t - dt) + (\text{groundwater\_recharge} - \text{groundwater\_abstractions}) * dt$                                                           | Freshwater_Lens = 12042762              | cu m                            | The initial freshwater lens volume was roughly estimated from a dome equation where the diameter is the island width (1,000m) and the height is the maximum freshwater thickness for Bonriki over a 12 year period (23m). While in reality, the freshwater lens is asymmetrical, a dome shape was used for simplification.<br>Source: Falkland & Woodroffe, 2004                                                                                                                                                                                                                                                                                                                                                                        |  |
| Water_in_Storage_Tanks(t)                                    | $\text{Water\_in\_Storage\_Tanks}(t - dt) + (\text{water\_collection} - \text{tank\_withdrawal}) * dt$                                                               | INIT<br>Water_in_Storage_Tanks = 56375  | cu m                            | Assuming the initial amount of water tanks in Tarawa start at half capacity.<br><br>5,245 tanks in Tarawa * 43% of population using rainwater harvesting = 2,255 tanks.<br><br>2,255 tanks (with a max of 50 cu m per tank) at half capacity = 56,375 cu meters                                                                                                                                                                                                                                                                                                                                                                                                                                                                         |  |
| Water_Tanks_in_Tarawa(t)                                     | $\text{Water\_Tanks\_in\_Tarawa}(t - dt) + (\text{new\_tank\_installations} - \text{discontinued\_tank\_use}) * dt$                                                  | INIT<br>Water_Tanks_in_Tarawa = 2255.35 | water tank                      | The 2005 National Census shows that 43% of households in South Tarawa use rainwater harvesting.<br><br>Source: Kiribati Tarawa Water Master Plan 2010-2030 (pg 23)                                                                                                                                                                                                                                                                                                                                                                                                                                                                                                                                                                      |  |
| discontinued_tank_use                                        | $\text{DELAY}((\text{Water\_Tanks\_in\_Tarawa}/\text{LIFESPAN\_OF\_WATER\_TANK}), 30)$                                                                               |                                         | water tank/Years                | Tank discontinuation rate is based on the lifespan of the tank.                                                                                                                                                                                                                                                                                                                                                                                                                                                                                                                                                                                                                                                                         |  |
| groundwater_abstractions                                     | $\text{pumping\_withdrawal} + (\text{INIT}(\text{Freshwater\_Lens}) - \text{volume\_of\_lens\_unaffected\_by\_SLR}) / \text{TIME\_PERIOD\_OF\_LENS\_VOLUME\_CHANGE}$ |                                         | cu m/year                       | The rate of groundwater lost from the freshwater lens is the amount from pumping in addition to the amount that is lost to salinisation.                                                                                                                                                                                                                                                                                                                                                                                                                                                                                                                                                                                                |  |
| groundwater_recharge                                         | $\text{MIN}(\text{effective\_rainfall} * \text{AVG\_RECHARGE\_RATE}, \text{volume\_that\_can\_infiltrate} / \text{TIME\_PERIOD\_OF\_LENS\_VOLUME\_CHANGE})$          |                                         | cu m/year                       | Recharge rate = precipitation - evapotranspiration +/- the change in soil-moisture store.<br><br>This calculation assumes soil-moisture store to be constant and only includes precipitation and evapotranspiration.<br><br>Source: Falkland & Woodroffe, 2004<br><br>This is currently assuming that all rainwater that hits non-developed land is soak into the ground for groundwater (no runoff). This is supported by Post et al., 2018 who say that runoff can be "neglected because of the high infiltration capacity of the soils, the flat topography, and the lack of surface flow feature on the island."<br><br>This is agreed by White (1996) who gives simplified water balance equation, where no soil hydrology needed. |  |
| new_tank_installations                                       | $\text{tank\_installation\_from\_new\_housing} + \text{new\_tanks\_funded\_by\_govt} + \text{tank\_replacement\_rate}$                                               |                                         | water tank/Years                | New tank installation rates are based primarily on a constant tank replacement rate to replace discontinued tanks and tank installations from new housing. When the government funding/ tank subsidy switch is on, new tanks can also be added from that.                                                                                                                                                                                                                                                                                                                                                                                                                                                                               |  |
| tank_withdrawal                                              | rainwater_usage                                                                                                                                                      |                                         | cu m / year                     | The rate of water withdrawal from tanks is from the usage.                                                                                                                                                                                                                                                                                                                                                                                                                                                                                                                                                                                                                                                                              |  |
| water_collection                                             | $\text{MIN}(\text{supply\_from\_house\_catchment}, \text{volume\_that\_can\_be\_collected}) * \text{RAINWATER\_HARVESTING\_SWITCH}$                                  |                                         | cu m/year                       | The rate of water collection is based on the rainwater able to be collected from a roof surface area, but limited by the amount of tank capacity (or vice versa).                                                                                                                                                                                                                                                                                                                                                                                                                                                                                                                                                                       |  |
| ADDITIONAL_WATER_CONSUMPTION_NEED_PER_CAPITA_PER_DEG_WARMING | 2                                                                                                                                                                    |                                         | liter / (people* day*Degrees C) | Estimate taken from Kiribati Tarawa Water Master Plan 2010-2030 (Section 5.2). The projection in the Master Plan was for 1deg C of warming by 2020 and allowed an additional 2L/person/day in demand. Using this, we estimate an increased demand of 2L/person/day for every 1degC of warming.                                                                                                                                                                                                                                                                                                                                                                                                                                          |  |
| AVG_RECHARGE_RATE                                            | 0.36                                                                                                                                                                 |                                         | Dimensionless                   | From historical rainfall and recharge data, Falkland & Woodroffe calculated an average recharge rate of 36% of rainfall.<br><br>Source: Falkland & Woodroffe, 2004                                                                                                                                                                                                                                                                                                                                                                                                                                                                                                                                                                      |  |

|                                                         |                                                                                                                                                                                                                                                                                       |  |                                           |                                                                                                                                                                                                                                                                                                                                                                                                                                                                                                                                                                                                                                                                                                                                                                                                                                                                                                            |  |
|---------------------------------------------------------|---------------------------------------------------------------------------------------------------------------------------------------------------------------------------------------------------------------------------------------------------------------------------------------|--|-------------------------------------------|------------------------------------------------------------------------------------------------------------------------------------------------------------------------------------------------------------------------------------------------------------------------------------------------------------------------------------------------------------------------------------------------------------------------------------------------------------------------------------------------------------------------------------------------------------------------------------------------------------------------------------------------------------------------------------------------------------------------------------------------------------------------------------------------------------------------------------------------------------------------------------------------------------|--|
| BONRIKI_LAND_AREA                                       | 9.5                                                                                                                                                                                                                                                                                   |  | sq km                                     | <p>The area of Bonriki was used before it is the surface area that infiltrates down into the main freshwater lens used for pumping. The water pumped from this area by the public utilities (PUB) supplies 67% of South Tarawa's population.</p> <p>Source: Post et al., 2018</p>                                                                                                                                                                                                                                                                                                                                                                                                                                                                                                                                                                                                                          |  |
| CONVERSION_MM_TO_M                                      | 0.001                                                                                                                                                                                                                                                                                 |  | m / mm                                    | Conversion of mm to m.                                                                                                                                                                                                                                                                                                                                                                                                                                                                                                                                                                                                                                                                                                                                                                                                                                                                                     |  |
| CONVERSION_SQ_KM_TO_SQ_M                                | 1000000                                                                                                                                                                                                                                                                               |  | sq m/ sq km                               | Conversion of sq km to sq m                                                                                                                                                                                                                                                                                                                                                                                                                                                                                                                                                                                                                                                                                                                                                                                                                                                                                |  |
| COST_OF_WATER_TANK                                      | 1313                                                                                                                                                                                                                                                                                  |  | Australia<br>n Dollars<br>/ water<br>tank | <p>Price sourced from tank retailer at \$850USD (\$1313AUD) for a 1000 gallon tank. Price conversion from USD to AUD made on Apr. 15, 2024.</p> <p>Source: <a href="https://tankretailer.com/products/quadel-plastic-water-storage-tank?currency=USD&amp;variant=47211282399552&amp;utm_medium=cpc&amp;utm_source=google&amp;utm_campaign=Google+Shopping&amp;stkn=6c7cd00f44c4&amp;srltid=AfmBOoq-36JVc4XSGgwntd93qvlaG_KDGwdEUOIhZ6M4zAwkB-bQ2f-VRE&amp;com_cvv=d30042528f072ba8a22b19c81250437cd47a2f30330f0ed03551c4efdaf3409e">https://tankretailer.com/products/quadel-plastic-water-storage-tank?currency=USD&amp;variant=47211282399552&amp;utm_medium=cpc&amp;utm_source=google&amp;utm_campaign=Google+Shopping&amp;stkn=6c7cd00f44c4&amp;srltid=AfmBOoq-36JVc4XSGgwntd93qvlaG_KDGwdEUOIhZ6M4zAwkB-bQ2f-VRE&amp;com_cvv=d30042528f072ba8a22b19c81250437cd47a2f30330f0ed03551c4efdaf3409e</a></p> |  |
| DAY_TO_YEAR_CONVERSION                                  | 365                                                                                                                                                                                                                                                                                   |  | day / year                                | Conversion of day to year                                                                                                                                                                                                                                                                                                                                                                                                                                                                                                                                                                                                                                                                                                                                                                                                                                                                                  |  |
| DESAL_SWITCH                                            | 0                                                                                                                                                                                                                                                                                     |  | Dimensio<br>nless                         | Switch turns on scenario for the use of desalination plants. Currently set at 0 as none of the proposed plants are currently in use.                                                                                                                                                                                                                                                                                                                                                                                                                                                                                                                                                                                                                                                                                                                                                                       |  |
| DESALINATION_PLANT_PROPOSED_WATER_PUMPING_RATES_PER_DAY | 3000                                                                                                                                                                                                                                                                                  |  | cu m /<br>(plants<br>*day)                | <p>The Environmental and Social Impact Assessment for the 2 proposed desalination plants estimates an additional 6,000 cu m/ day of water supply. It is assumed that each plant will contribute 3,000 cu m/day.</p> <p>Source: Kiribati: South Tarawa Water Supply Project (ADB, 2020)</p>                                                                                                                                                                                                                                                                                                                                                                                                                                                                                                                                                                                                                 |  |
| desalination_water_usage                                | IF TIME < 2024 THEN 0 ELSE<br>MIN(DESALINATION_PLANT_PROPOSED_WATER_PUMPING_RATES_PER_DAY*NUMBER_OF_DESAL_PLANTS*DAY_TO_YEAR_CONVERSION, total_water_demand_yearly)*DESAL_SWITCH                                                                                                      |  | cu m /<br>year                            |                                                                                                                                                                                                                                                                                                                                                                                                                                                                                                                                                                                                                                                                                                                                                                                                                                                                                                            |  |
| effect_of_rainwater_scarcity_on_consumption             | GRAPH(IF rainwater_need > 0 THEN<br>(Water_in_Storage_Tanks/rainwater_need) ELSE 1) Points: (0.000, 0.2000), (0.100, 0.2357), (0.200, 0.2775), (0.300, 0.3264), (0.400, 0.3836), (0.500, 0.4506), (0.600, 0.5289), (0.700, 0.6206), (0.800, 0.7278), (0.900, 0.8532), (1.000, 1.0000) |  | Dimensio<br>nless                         | <p>This relationship represents a behaviour where rainwater tank water is used freely if tanks are full. The use of rainwater becomes more measured if the amount in the tanks is perceived to be inadequate to the usage need. A minimum value was set to indicate that rainwater usage would still continue, even if minimally, at low tank supply.</p>                                                                                                                                                                                                                                                                                                                                                                                                                                                                                                                                                  |  |
| EFFECT_OF_SEA_LEVEL_RISE_ON_SALINITY                    | 100                                                                                                                                                                                                                                                                                   |  | m/ (m)                                    | <p>Sherif and Singh (1999) and Werner &amp; Simmons (2009) both found that there may be toe migration "on the order of 5km inland for a 500-mm sea level rise". This assumed a constant head, compared to a constant flux conditions which would be around 50 meters.</p> <p>A rate of 5000meters/ 0.5 meters seems too high after testing. Value lowered to 50meters/0.5meters.</p> <p>Source: Werner&amp;Simmons (2009)</p> <p>Constant head conditions were assumed because water table levels stay relatively constant ("at typical depths of about 1-2 m below groundlevel".</p> <p>Source: Falkland &amp;Woodroffe (2004)</p>                                                                                                                                                                                                                                                                        |  |
| effective_rainfall                                      | IF TIME < 2023 THEN (Climate_Impacts.HISTORIC_RAINFALL-evapotranspiration_rate)*BONRIKI_LAND_AREA*CONVERSION_MM_TO_M*CONVERSION_SQ_KM_TO_SQ_M ELSE<br>(Climate_Impacts.PROJECTED_RAINFALL-evapotranspiration_rate)*BONRIKI_LAND_AREA*CONVERSION_MM_TO_M*CONVERSION_SQ_KM_TO_SQ_M      |  | cu m/<br>year                             |                                                                                                                                                                                                                                                                                                                                                                                                                                                                                                                                                                                                                                                                                                                                                                                                                                                                                                            |  |

|                                           |                                                                                                                                                                                              |  |                       |                                                                                                                                                                                                                                                                                                                                                                                                                                                         |  |
|-------------------------------------------|----------------------------------------------------------------------------------------------------------------------------------------------------------------------------------------------|--|-----------------------|---------------------------------------------------------------------------------------------------------------------------------------------------------------------------------------------------------------------------------------------------------------------------------------------------------------------------------------------------------------------------------------------------------------------------------------------------------|--|
| evapotranspiration_rate                   | IF TIME< 2023 THEN<br>17.162*LN(Climate_Impacts.HISTORIC_RAINFALL)+26.1 ELSE<br>17.162*LN(Climate_Impacts.PROJECTED_RAINFALL)+26.1                                                           |  | mm/year               | Actual annual evapotranspiration rates (mm) were plotted against month precipitation (mm) in Kiribati using values from 'Table 19-4. Water-balance calculations for 1989-1990, Tarawa.'<br>Data was fit with a logarithmic trend line to determine the equation of $y = 17.162\ln(x) + 26.1$<br><br>Water-balance calculations found annual evapotranspiration rates to be higher in wet years than dry years.<br><br>Source: Falkland & Woodroffe 2004 |  |
| freshwater_lens_width                     | 1000-inland_migration_of_lens_from_SLR                                                                                                                                                       |  | m                     | Initial island width was estimated at 1,000m (Falkland & Woodroffe, 2004). Updated island width is initial width minus the width of the freshwater lens lost to sea level rise.                                                                                                                                                                                                                                                                         |  |
| GOVT_FUNDING_SWITCH                       | 0                                                                                                                                                                                            |  | Dimensionless         | Switch turns on scenario for testing government funding.                                                                                                                                                                                                                                                                                                                                                                                                |  |
| inland_migration_of_lens_from_SLR         | Climate_Impacts.sea_level_rise*EFFECT_OF_SEA_LEVEL_RISE_ON_SALINITY                                                                                                                          |  | m                     | The inland migration of freshwater lens is calculated from the projected sea level rise and the effect relationship between horizontal distance to vertical sea rise.                                                                                                                                                                                                                                                                                   |  |
| LENS_THICKNESS                            | 23                                                                                                                                                                                           |  | m                     |                                                                                                                                                                                                                                                                                                                                                                                                                                                         |  |
| LIFESPAN_OF_WATER_TANK                    | 30                                                                                                                                                                                           |  | year                  | Based on average lifespan for polyethylene tanks.<br><br>Source: <a href="https://smartwateronline.com/news/how-long-will-my-water-tank-last#:~:text=Summary,well%20maintained%20and%20well%2Dpositioned.">https://smartwateronline.com/news/how-long-will-my-water-tank-last#:~:text=Summary,well%20maintained%20and%20well%2Dpositioned.</a>                                                                                                          |  |
| LITER_TO_CU_M_CONVERSION                  | 1000                                                                                                                                                                                         |  | liter / cu m          | Conversion of liter to cubic meter                                                                                                                                                                                                                                                                                                                                                                                                                      |  |
| MIN_DAILY_WATER_CONSUMPTION_NEEDED        | 65                                                                                                                                                                                           |  | liter / (people *day) | Water consumption is estimated at 65L/ person/day.<br><br>Source: Kiribati Tarawa Water Master Plan 2010-2030 (pg 24)                                                                                                                                                                                                                                                                                                                                   |  |
| new_tanks_funded_by_govt                  | (Finances."GOVERNMENT_FUNDING_PER_CAPITA_IN_S_TARAWA"*Demographics.Population_in_Tarawa)*PERCENT_OF_BUDGET_ON_WATER_INFRASTRUCTURE*PERCENT_CONVERSION/COST_OF_WATER_TANK*GOVT_FUNDING_SWITCH |  | water tank/ year      |                                                                                                                                                                                                                                                                                                                                                                                                                                                         |  |
| NUMBER_OF_DESAL_PLANTS                    | 3                                                                                                                                                                                            |  | plants                | There are currently 3 proposed desalination plants in South Tarawa.                                                                                                                                                                                                                                                                                                                                                                                     |  |
| PERCENT_CONVERSION                        | 0.01                                                                                                                                                                                         |  | Dimensionless         | Conversion of percent to decimal value.                                                                                                                                                                                                                                                                                                                                                                                                                 |  |
| PERCENT_OF_BUDGET_ON_WATER_INFRASTRUCTURE | 0.6                                                                                                                                                                                          |  | Dimensionless         | Estimated from percent of Infrastructure budget in the Ministry of Public Works and Utilities (\$4,652,123AUD) vs the total budget for 2008 (\$81,881,605).<br>\$500,000 of this was estimated towards rainwater tanks.<br><br>Source: National Budget 2009 (pg 67)<br><br>Value is 0.006 (0.6%)                                                                                                                                                        |  |
| PERCENT_OF_NEW_HOUSES_USING_RAINWATER     | 1                                                                                                                                                                                            |  | Dimensionless         | This value was calculated through a calibration optimization.<br><br>COME BACK TO THIS NUMBER.                                                                                                                                                                                                                                                                                                                                                          |  |

|                                                         |                                                                                                                                                                                                                                                                                                                                                                                                                                  |  |                         |                                                                                                                                                                                                                                                                                                                                                                                                                                                                  |  |
|---------------------------------------------------------|----------------------------------------------------------------------------------------------------------------------------------------------------------------------------------------------------------------------------------------------------------------------------------------------------------------------------------------------------------------------------------------------------------------------------------|--|-------------------------|------------------------------------------------------------------------------------------------------------------------------------------------------------------------------------------------------------------------------------------------------------------------------------------------------------------------------------------------------------------------------------------------------------------------------------------------------------------|--|
| pumping_withdrawal                                      | $\text{MIN}((\text{groundwater\_recharge} * \text{RECHARGE\_ABSTRACTION\_PERCENT}), \text{MAX}(0, (\text{total\_water\_demand\_yearly} - \text{desalination\_water\_usage} - \text{rainwater\_usage})))$                                                                                                                                                                                                                         |  | cu m / year             | Water supply will first prioritise desalination plant supply then use groundwater and rainwater if more is needed. The pumping is also affected by the preference between rainwater harvesting and groundwater pumping. The pumping will compensate past the rainwater/groundwater preference if rainwater cannot achieve the set preference ratio. The abstraction rate is limited by the recommendation that only 25-50% of the recharge volume be abstracted. |  |
| RAINWATER_HARVESTING_SWITCH                             | 1                                                                                                                                                                                                                                                                                                                                                                                                                                |  | Dimensionless           | Switch turns on scenario for the use of rainwater harvesting.                                                                                                                                                                                                                                                                                                                                                                                                    |  |
| rainwater_need                                          | $(\text{total\_water\_demand\_yearly} - \text{desalination\_water\_usage}) * \text{rainwater\_preference\_to\_groundwater}$                                                                                                                                                                                                                                                                                                      |  | cu m / year             | This variable is used to indicate is rainwater harvesting will be used. If yes, then consumption behaviour will be adjusted.                                                                                                                                                                                                                                                                                                                                     |  |
| rainwater_preference_to_groundwater                     | 0.5                                                                                                                                                                                                                                                                                                                                                                                                                              |  | Dimensionless           | The preference value between rainwater harvesting and groundwater pumping is set to 50:50.                                                                                                                                                                                                                                                                                                                                                                       |  |
| rainwater_usage                                         | $\text{MAX}(0, \text{rainwater\_need} * \text{effect\_of\_rainwater\_scarcity\_on\_consumption})$                                                                                                                                                                                                                                                                                                                                |  | cu m / year             | Water supply will first prioritise desalination plant supply then use groundwater and rainwater if more is needed. The rainwater usage is also affected by the preference between rainwater harvesting and groundwater pumping.                                                                                                                                                                                                                                  |  |
| RECHARGE_ABSTRACTION_PERCENT                            | 0.5                                                                                                                                                                                                                                                                                                                                                                                                                              |  | Dimensionless           | In order to maintain the integrity of the freshwater lens, only 25-50% of the recharge amount should be withdrawn.<br><br>Source: Management of freshwater lenses on small Pacific islands (White & Falkland, 2009)                                                                                                                                                                                                                                              |  |
| ROOF_AREA                                               | 140                                                                                                                                                                                                                                                                                                                                                                                                                              |  | sq m / housing building | The average roof area (140 sq m) from housing types in Kiribati was used.<br>Source: Foon et al., 2006                                                                                                                                                                                                                                                                                                                                                           |  |
| supply_from_house_catchment                             | $\text{IF TIME} < 2023 \text{ THEN}$<br>$(\text{LOOKUP}(\text{Climate\_Impacts.HISTORIC\_RAINFALL}, \text{TIME}) * \text{Tarawa.Housing\_Units} * \text{ROOF\_AREA} / 2 * \text{CONVERSION\_MM\_TO\_M} / (\text{Tarawa.HOUSING\_LEVELS}))$<br>$\text{ELSE}(\text{Climate\_Impacts.PROJECTED\_RAINFALL} * \text{Tarawa.Housing\_Units} * \text{ROOF\_AREA} / 2 * \text{CONVERSION\_MM\_TO\_M} / (\text{Tarawa.HOUSING\_LEVELS}))$ |  | cubic meter / year      | From t=0 until 2020, the volume will be calculated from the historic rainfall amount multiplied by the catchment area. The catchment area is assumed to be half of the house footprint.<br><br>For future projections, the volume is calculated from projected rainfall (based on RCPs) multiplied by the catchment area. The catchment area is assumed to be half of the house footprint.                                                                       |  |
| TANK_EVALUTION_TIME                                     | 1                                                                                                                                                                                                                                                                                                                                                                                                                                |  | year                    | A tank evaluation time of 1 year was chosen to match the interval of rainfall data to make sure that more rainfall is not being collected than available.                                                                                                                                                                                                                                                                                                        |  |
| tank_installation_from_new_housing                      | $\text{Tarawa.housing\_development} / (\text{IF Tarawa.SWITCH\_HOUSING\_LEVELS} = 1 \text{ THEN Tarawa.HOUSING\_LEVELS ELSE } 1) * \text{WATER\_TANK\_PER\_HOUSE\_FOOTPRINT} * \text{PERCENT\_OF\_NEW\_HOUSES\_USING\_RAINWATER}$                                                                                                                                                                                                |  | water tank / year       | The number of tanks installed from new builds is calculated from the percent of new houses using rainwater harvesting of the new housing units developed (divided by levels if multi-story switch is on). Each new housing build can have a certain number of tanks, based on the 'Water tank per house footprint' variable.                                                                                                                                     |  |
| tank_replacement_rate                                   | 10                                                                                                                                                                                                                                                                                                                                                                                                                               |  | water tank / year       |                                                                                                                                                                                                                                                                                                                                                                                                                                                                  |  |
| TANK_VOLUME                                             | 50                                                                                                                                                                                                                                                                                                                                                                                                                               |  | cu m / (water tank)     | A tank volume of 50 cu meters is used from Foon et al. (2006) who advises that this is the maximum size which a normal household can afford.                                                                                                                                                                                                                                                                                                                     |  |
| TIME_PERIOD_OF_LENS_VOLUME_CHANGE                       | 1                                                                                                                                                                                                                                                                                                                                                                                                                                |  | year                    | Period of change was selected to match the rainfall data and other model evaluation increments.                                                                                                                                                                                                                                                                                                                                                                  |  |
| total_additional_water_needed_from_temperature_increase | $\text{ADDITIONAL\_WATER\_CONSUMPTION\_NEED\_PER\_CAPITA\_PER\_DEG\_WARMING} * \text{Climate\_Impacts.degree\_of\_warming}$                                                                                                                                                                                                                                                                                                      |  | liter / (people* day)   | Total additional water needed from temperature increase is calculated from the projected temperature increase and the relationship between temperature and water need increase.                                                                                                                                                                                                                                                                                  |  |
| total_capacity_of_tanks                                 | $\text{Water\_Tanks\_in\_Tarawa} * \text{TANK\_VOLUME}$                                                                                                                                                                                                                                                                                                                                                                          |  | cu m                    | Total capacity of rainwater tanks in South Tarawa is calculated from the total number of tanks and their volume.                                                                                                                                                                                                                                                                                                                                                 |  |
| total_water_demand_yearly                               | $((\text{MIN\_DAILY\_WATER\_CONSUMPTION\_NEEDED} + \text{total\_additional\_water\_needed\_from\_temperature\_increase}) * \text{Demographics.Population\_in\_Tarawa}) * \text{DAY\_TO\_YEAR\_CONVERSION} / \text{LITER\_TO\_CU\_M\_CONVERSION}$                                                                                                                                                                                 |  | cu m / year             | The total yearly water demand for South Tarawa is based on the minimum water needed per person, adjusted to increase with temperature, and dynamically updated with population changes.                                                                                                                                                                                                                                                                          |  |



|                                  |                                                                                                                                                 |  |                               |                                                                                                                                                                                                                                                                                                                                                                                                                                                 |  |
|----------------------------------|-------------------------------------------------------------------------------------------------------------------------------------------------|--|-------------------------------|-------------------------------------------------------------------------------------------------------------------------------------------------------------------------------------------------------------------------------------------------------------------------------------------------------------------------------------------------------------------------------------------------------------------------------------------------|--|
| volume_of_lens_unaffected_by_SLR | $(2/3) \cdot \pi \cdot (\text{freshwater\_lens\_width}/2)^2 \cdot \text{LENS\_THICKNESS}$                                                       |  | cu m                          | The freshwater lens volume was roughly estimated from a dome equation where the diameter is the island width ('freshwater lens width' converter) and the height is the the maximum freshwater thickness for Bonriki over a 12 year period (23m). While in reality, the freshwater lens is assymettrical, a dome shape was used for simplification. A static value of lens thickness was also assumed.<br><br>Source: Falkland & Woodroffe, 2004 |  |
| volume_that_can_be_collected     | $\text{MAX}(0, (\text{total\_capacity\_of\_tanks} - \text{Water\_in\_Storage\_Tanks}) / \text{TANK\_EVALUTION\_TIME})$                          |  | cu m / year                   | The total volume of water that can be in the tanks is calculated from the total capacity minus the amount of water that is already in the tanks. Max function ensures that it can't go below 0.                                                                                                                                                                                                                                                 |  |
| volume_that_can_infiltrate       | $\text{MAX}(0, \text{volume\_of\_lens\_unaffected\_by\_SLR} - \text{Freshwater\_Lens})$                                                         |  | cu m                          | The volume that can be infiltrated (filled) is the total capacity minus the volume of water that is already in there.                                                                                                                                                                                                                                                                                                                           |  |
| water_adequacy_ratio             | $(\text{total\_water\_demand\_yearly} - \text{water\_demand\_deficit}) / \text{total\_water\_demand\_yearly}$                                   |  | Dimensionless                 |                                                                                                                                                                                                                                                                                                                                                                                                                                                 |  |
| water_demand_deficit             | $\text{MAX}(0, \text{total\_water\_demand\_yearly} - \text{desalination\_water\_usage} - \text{rainwater\_usage} - \text{pumping\_withdrawal})$ |  | cu m / year                   |                                                                                                                                                                                                                                                                                                                                                                                                                                                 |  |
| WATER_TANK_PER_HOUSE_FOOTPRINT   | 2                                                                                                                                               |  | water tank / housing building | Each house is assumed to have the ability to accommodate up to two water tanks.                                                                                                                                                                                                                                                                                                                                                                 |  |

| Run Specs                            |       |
|--------------------------------------|-------|
| Start Time                           | 1990  |
| Stop Time                            | 2100  |
| DT                                   | 1     |
| Fractional DT                        | TRUE  |
| Save Interval                        | 1     |
| Sim Duration                         | 1.5   |
| Time Units                           | Years |
| Pause Interval                       | 0     |
| Integration Method                   | Euler |
| Keep all variable results            | TRUE  |
| Run By                               | Run   |
| Calculate loop dominance information | TRUE  |
| Exhaustive Search Threshold          | 1000  |

| Custom Unit   | Aliases          | Equation |
|---------------|------------------|----------|
| Dimensionless | dmnl<br>unitless | 1        |
