# Supplementary material for: Identifying key drivers of habitability loss reveals pathways for climate change adaptation in the Pacific
Source: Research Square preprint supplement (doi:10.21203/rs.3.rs-6130097/v1), 2025-03-18
Supplement: Supplementary file 4 [file 26b48a3d883e534fe0c3fa78.pdf]

# Loop Categorisation SSP 1-2.6

| Loop Label                | Categorisation                                                                                    | Loop Details                                                                                                                                                                                                                                                                                                                                                                                                                                                                                                                                                                                                                                                                                                  |
|---------------------------|---------------------------------------------------------------------------------------------------|---------------------------------------------------------------------------------------------------------------------------------------------------------------------------------------------------------------------------------------------------------------------------------------------------------------------------------------------------------------------------------------------------------------------------------------------------------------------------------------------------------------------------------------------------------------------------------------------------------------------------------------------------------------------------------------------------------------|
| R1 1 stock 2 variables    | Demographics (births)                                                                             | Demographics.births→Demographics.Population in Tarawa                                                                                                                                                                                                                                                                                                                                                                                                                                                                                                                                                                                                                                                         |
| B1 1 stock 2 variables    | Demographics (movement)                                                                           | Demographics.outer islands to S Tarawa flow→Demographics.Population in Outer Islands                                                                                                                                                                                                                                                                                                                                                                                                                                                                                                                                                                                                                          |
| B2 1 stock 4 variables    | Water (consumption)                                                                               | Water Resources.tank withdrawal→Water Resources.Water in Storage Tanks→Water Resources.effect of rainwater scarcity on consumption→Water Resources.rainwater usage                                                                                                                                                                                                                                                                                                                                                                                                                                                                                                                                            |
| R2 1 stock 2 variables    | Demographics (births)                                                                             | Demographics.outer islands births→Demographics.Population in Outer Islands                                                                                                                                                                                                                                                                                                                                                                                                                                                                                                                                                                                                                                    |
| B3 1 stock 2 variables    | Demographics (movement)                                                                           | Demographics.out-migration from the outer islands→Demographics.Population in Outer Islands                                                                                                                                                                                                                                                                                                                                                                                                                                                                                                                                                                                                                    |
| B4 1 stock 2 variables    | Demographics (deaths)                                                                             | Demographics.deaths→Demographics.Population in Tarawa                                                                                                                                                                                                                                                                                                                                                                                                                                                                                                                                                                                                                                                         |
| B5 1 stock 2 variables    | Demographics (deaths)                                                                             | Demographics.outer islands deaths→Demographics.Population in Outer Islands                                                                                                                                                                                                                                                                                                                                                                                                                                                                                                                                                                                                                                    |
| B6 1 stock 3 variables    | Land (loss)                                                                                       | Tarawa.residential land loss→Tarawa.Residential Land Area→Tarawa.percent of residential land area                                                                                                                                                                                                                                                                                                                                                                                                                                                                                                                                                                                                             |
| B7 1 stock 3 variables    | Settlements/ Infrastructure (tanks)                                                               | Water Resources.Water Tanks in Tarawa→__internal__→Water Resources.discontinued tank use                                                                                                                                                                                                                                                                                                                                                                                                                                                                                                                                                                                                                      |
| B8 1 stock 7 variables    | Demographics (movement), Water (consumption)                                                      | Demographics.outer islands to S Tarawa flow→Demographics.Population in Tarawa→Water Resources.total water demand yearly→Water Resources.water demand deficit→Water Resources.water adequacy ratio→Utility Functions.utility of moving to S Tarawa→Utility Functions.probability of moving to S Tarawa from outer islands                                                                                                                                                                                                                                                                                                                                                                                      |
| B9 1 stock 3 variables    | Water (tanks)                                                                                     | Water Resources.water collection→Water Resources.Water in Storage Tanks→Water Resources.volume that can be collected                                                                                                                                                                                                                                                                                                                                                                                                                                                                                                                                                                                          |
| R3 1 stock 6 variables    | Demographics (movement), Water (consumption)                                                      | Demographics.outer islands to S Tarawa flow→Demographics.Population in Tarawa→Water Resources.total water demand yearly→Water Resources.water adequacy ratio→Utility Functions.utility of moving to S Tarawa→Utility Functions.probability of moving to S Tarawa from outer islands                                                                                                                                                                                                                                                                                                                                                                                                                           |
| B10 1 stock 3 variables   | Land (loss)                                                                                       | Tarawa.loss of open land→Tarawa.Undeveloped Land Area→Tarawa.percent of land area undeveloped                                                                                                                                                                                                                                                                                                                                                                                                                                                                                                                                                                                                                 |
| B11 1 stock 6 variables   | Land (development), Settlements/Infrastructure (housing)                                          | Tarawa.developing open land→Tarawa.Undeveloped Land Area→Tarawa.function of effect of land availability on moving in with family→Tarawa.percent of new people moving in with family→Tarawa.housing units needed for new people→Tarawa.housing development                                                                                                                                                                                                                                                                                                                                                                                                                                                     |
| B12 1 stock 5 variables   | Demographics (movement), Economic                                                                 | Demographics.outer islands to S Tarawa flow→Demographics.Population in Tarawa→Finances.income in S Tarawa per capita→Utility Functions.utility of moving to S Tarawa→Utility Functions.probability of moving to S Tarawa from outer islands                                                                                                                                                                                                                                                                                                                                                                                                                                                                   |
| R4 1 stock 6 variables    | Demographics (movement), Economic                                                                 | Demographics.outer islands to S Tarawa flow→Demographics.Population in Tarawa→Finances."total income in S. Tarawa"→Finances.income in S Tarawa per capita→Utility Functions.utility of moving to S Tarawa→Utility Functions.probability of moving to S Tarawa from outer islands                                                                                                                                                                                                                                                                                                                                                                                                                              |
| R5 3 stocks 16 variables  | Settlements/Infrastructure ( houses), Demographics (movement, births), Water (tanks, consumption) | Water Resources.water collection→Water Resources.Water in Storage Tanks→Water Resources.effect of rainwater scarcity on consumption→Water Resources.rainwater usage→Water Resources.water demand deficit→Water Resources.water adequacy ratio→Utility Functions.utility of moving to S Tarawa→Utility Functions.probability of moving to S Tarawa from outer islands→Demographics.outer islands to S Tarawa flow→Demographics.Population in Tarawa→Demographics.births→Tarawa.new people to Tarawa→Tarawa.housing units needed for new people→Tarawa.housing development→Tarawa.Housing Units→Water Resources.supply from house catchment                                                                     |
| R6 2 stocks 14 variables  | Settlements/Infrastructure ( houses), Demographics (movement), Water (tanks, consumption)         | Water Resources.water collection→Water Resources.Water in Storage Tanks→Water Resources.effect of rainwater scarcity on consumption→Water Resources.rainwater usage→Water Resources.water demand deficit→Water Resources.water adequacy ratio→Utility Functions.utility of moving to S Tarawa→Utility Functions.probability of moving to S Tarawa from outer islands→Demographics.outer islands to S Tarawa flow→Tarawa.new people to Tarawa→Tarawa.housing units needed for new people→Tarawa.housing development→Tarawa.Housing Units→Water Resources.supply from house catchment                                                                                                                           |
| B13 1 stock 4 variables   | Demographics (births)                                                                             | Demographics.births→Demographics.Population in Tarawa→Tarawa."population density in S. Tarawa"→Tarawa.birthrate in Tarawa                                                                                                                                                                                                                                                                                                                                                                                                                                                                                                                                                                                     |
| B14 3 stocks 18 variables | Settlements/Infrastructure ( houses), Demographics (movement, births), Water (tanks, consumption) | Water Resources.water collection→Water Resources.Water in Storage Tanks→Water Resources.effect of rainwater scarcity on consumption→Water Resources.rainwater usage→Water Resources.water demand deficit→Water Resources.water adequacy ratio→Utility Functions.utility of moving to S Tarawa→Utility Functions.probability of moving to S Tarawa from outer islands→Demographics.outer islands to S Tarawa flow→Demographics.Population in Tarawa→Tarawa."population density in S. Tarawa"→Tarawa.birthrate in Tarawa→Demographics.births→Tarawa.new people to Tarawa→Tarawa.housing units needed for new people→Tarawa.housing development→Tarawa.Housing Units→Water Resources.supply from house catchment |

# Loop Categorisation SSP 5-8.5

| Loop Label                | Categorisation                                                                                       | Loop Details                                                                                                                                                                                                                                                                                                                                                                                                                                                                                                                                                                                                                                                                                                                                                                                  |
|---------------------------|------------------------------------------------------------------------------------------------------|-----------------------------------------------------------------------------------------------------------------------------------------------------------------------------------------------------------------------------------------------------------------------------------------------------------------------------------------------------------------------------------------------------------------------------------------------------------------------------------------------------------------------------------------------------------------------------------------------------------------------------------------------------------------------------------------------------------------------------------------------------------------------------------------------|
| R1 1 stock 2 variables    | Demographics (births)                                                                                | Demographics.births→Demographics.Population in Tarawa                                                                                                                                                                                                                                                                                                                                                                                                                                                                                                                                                                                                                                                                                                                                         |
| B1 1 stock 4 variables    | Water (consumption)                                                                                  | Water Resources.tank withdrawal→Water Resources.Water in Storage Tanks→Water Resources.effect of rainwater scarcity on consumption→Water Resources.rainwater usage                                                                                                                                                                                                                                                                                                                                                                                                                                                                                                                                                                                                                            |
| B2 1 stock 2 variables    | Demographics (movement)                                                                              | Demographics.outer islands to S Tarawa flow→Demographics.Population in Outer Islands                                                                                                                                                                                                                                                                                                                                                                                                                                                                                                                                                                                                                                                                                                          |
| R2 1 stock 2 variables    | Demographics (births)                                                                                | Demographics.outer islands births→Demographics.Population in Outer Islands                                                                                                                                                                                                                                                                                                                                                                                                                                                                                                                                                                                                                                                                                                                    |
| B3 1 stock 3 variables    | Water (tanks)                                                                                        | Water Resources.water collection→Water Resources.Water in Storage Tanks→Water Resources.volume that can be collected                                                                                                                                                                                                                                                                                                                                                                                                                                                                                                                                                                                                                                                                          |
| B4 1 stock 2 variables    | Demographics (movement)                                                                              | Demographics.out-migration from the outer islands→Demographics.Population in Outer Islands                                                                                                                                                                                                                                                                                                                                                                                                                                                                                                                                                                                                                                                                                                    |
| B5 1 stock 2 variables    | Demographics (deaths)                                                                                | Demographics.deaths→Demographics.Population in Tarawa                                                                                                                                                                                                                                                                                                                                                                                                                                                                                                                                                                                                                                                                                                                                         |
| B6 1 stock 2 variables    | Demographics (deaths)                                                                                | Demographics.outer islands deaths→Demographics.Population in Outer Islands                                                                                                                                                                                                                                                                                                                                                                                                                                                                                                                                                                                                                                                                                                                    |
| B7 1 stock 3 variables    | Land (loss)                                                                                          | Tarawa.residential land loss→Tarawa.Residential Land Area→Tarawa.percent of residential land area                                                                                                                                                                                                                                                                                                                                                                                                                                                                                                                                                                                                                                                                                             |
| B8 1 stock 3 variables    | Settlements/Infrastructure (tanks)                                                                   | Water Resources.Water Tanks in Tarawa→__internal__→Water Resources.discontinued tank use                                                                                                                                                                                                                                                                                                                                                                                                                                                                                                                                                                                                                                                                                                      |
| R3 3 stocks 19 variables  | Settlements/Infrastructure (tanks, houses),<br>Demographics (movement, births), Water (tanks)        | Water Resources.new tank installations→Water Resources.Water Tanks in Tarawa→Water Resources.total capacity of tanks→Water Resources.volume that can be collected→Water Resources.water collection→Water Resources.Water in Storage Tanks→Water Resources.effect of rainwater scarcity on consumption→Water Resources.rainwater usage→Water Resources.water demand deficit→Water Resources.water adequacy ratio→Utility Functions.utility of moving to S Tarawa→Utility Functions.probability of moving to S Tarawa from outer islands→Demographics.outer islands to S Tarawa flow→Demographics.Population in Tarawa→Demographics.births→Tarawa.new people to Tarawa→Tarawa.housing units needed for new people→Tarawa.housing development→Water Resources.tank installation from new housing |
| B9 1 stock 7 variables    | Demographics (movement), Water (consumption)                                                         | Demographics.outer islands to S Tarawa flow→Demographics.Population in Tarawa→Water Resources.total water demand yearly→Water Resources.water demand deficit→Water Resources.water adequacy ratio→Utility Functions.utility of moving to S Tarawa→Utility Functions.probability of moving to S Tarawa from outer islands                                                                                                                                                                                                                                                                                                                                                                                                                                                                      |
| B10 1 stock 3 variables   | Land (loss)                                                                                          | Tarawa.loss of open land→Tarawa.Undeveloped Land Area→Tarawa.percent of land area undeveloped                                                                                                                                                                                                                                                                                                                                                                                                                                                                                                                                                                                                                                                                                                 |
| R4 1 stock 6 variables    | Demographics (movement), Water (consumption)                                                         | Demographics.outer islands to S Tarawa flow→Demographics.Population in Tarawa→Water Resources.total water demand yearly→Water Resources.water adequacy ratio→Utility Functions.utility of moving to S Tarawa→Utility Functions.probability of moving to S Tarawa from outer islands                                                                                                                                                                                                                                                                                                                                                                                                                                                                                                           |
| B11 1 stock 6 variables   | Land (development),<br>Settlements/Infrastructure (housing)                                          | Tarawa.developing open land→Tarawa.Undeveloped Land Area→Tarawa.function of effect of land availability on moving in with family→Tarawa.percent of new people moving in with family→Tarawa.housing units needed for new people→Tarawa.housing development                                                                                                                                                                                                                                                                                                                                                                                                                                                                                                                                     |
| B12 1 stock 5 variables   | Demographics (movement), Economic                                                                    | Demographics.outer islands to S Tarawa flow→Demographics.Population in Tarawa→Finances.income in S Tarawa per capita→Utility Functions.utility of moving to S Tarawa→Utility Functions.probability of moving to S Tarawa from outer islands                                                                                                                                                                                                                                                                                                                                                                                                                                                                                                                                                   |
| R5 3 stocks 16 variables  | Settlements/Infrastructure ( houses),<br>Demographics (movement, births), Water (tanks, consumption) | Water Resources.water collection→Water Resources.Water in Storage Tanks→Water Resources.effect of rainwater scarcity on consumption→Water Resources.rainwater usage→Water Resources.water demand deficit→Water Resources.water adequacy ratio→Utility Functions.utility of moving to S Tarawa→Utility Functions.probability of moving to S Tarawa from outer islands→Demographics.outer islands to S Tarawa flow→Demographics.Population in Tarawa→Demographics.births→Tarawa.new people to Tarawa→Tarawa.housing units needed for new people→Tarawa.housing development→Tarawa.Housing Units→Water Resources.supply from house catchment                                                                                                                                                     |
| R6 2 stocks 14 variables  | Settlements/Infrastructure ( houses),<br>Demographics (movement), Water (tanks, consumption)         | Water Resources.water collection→Water Resources.Water in Storage Tanks→Water Resources.effect of rainwater scarcity on consumption→Water Resources.rainwater usage→Water Resources.water demand deficit→Water Resources.water adequacy ratio→Utility Functions.utility of moving to S Tarawa→Utility Functions.probability of moving to S Tarawa from outer islands→Demographics.outer islands to S Tarawa flow→Tarawa.new people to Tarawa→Tarawa.housing units needed for new people→Tarawa.housing development→Tarawa.Housing Units→Water Resources.supply from house catchment                                                                                                                                                                                                           |
| B13 1 stock 4 variables   | Demographics (births)                                                                                | Demographics.births→Demographics.Population in Tarawa→Tarawa."population density in S. Tarawa"→Tarawa.birthrate in Tarawa                                                                                                                                                                                                                                                                                                                                                                                                                                                                                                                                                                                                                                                                     |
| B14 3 stocks 18 variables | Settlements/Infrastructure ( houses),<br>Demographics (movement, births), Water (tanks, consumption) | Water Resources.water collection→Water Resources.Water in Storage Tanks→Water Resources.effect of rainwater scarcity on consumption→Water Resources.rainwater usage→Water Resources.water demand deficit→Water Resources.water adequacy ratio→Utility Functions.utility of moving to S Tarawa→Utility Functions.probability of moving to S Tarawa from outer islands→Demographics.outer islands to S Tarawa flow→Demographics.Population in Tarawa→Tarawa."population density in S. Tarawa"→Tarawa.birthrate in Tarawa→Demographics.births→Tarawa.new people to Tarawa→Tarawa.housing units needed for new people→Tarawa.housing development→Tarawa.Housing Units→Water Resources.supply from house catchment                                                                                 |
