# Supplementary material for: Identifying key drivers of habitability loss reveals pathways for climate change adaptation in the Pacific
Source: Research Square preprint supplement (doi:10.21203/rs.3.rs-6130097/v1), 2025-03-18
Supplement: Supplementary file 5 [file 38b9d75067459544636388f0.pdf]

## Loop Dominance SSP 5-8.5

[illegible]

### Normalised

[illegible]

## Loop Dominance SSP 5-8.5

[illegible]

### Normalised

[illegible]

## Loop Dominance SSP 5-8.5

[illegible]

### Normalised

[illegible]

## Loop Dominance SSP 5-8.5

[illegible]

### Normalised

[illegible]

## Loop Dominance SSP 5-8.5

[illegible]

### Normalised

[illegible]

## Loop Dominance SSP 5-8.5

[illegible]

### Normalised

[illegible]

## Loop Dominance SSP 5-8.5

[illegible]

### Normalised

[illegible]

## Loop Dominance SSP 5-8.5

[illegible]

### Normalised

[illegible]

## Loop Dominance SSP 5-8.5

| Loop Label               | 2098 | 2099 | 2100 |
|--------------------------|------|------|------|
| R1 1 stock 2 variables   | 26%  | 28%  | 28%  |
| B1 1 stock 4 variables   | 12%  | 11%  | 12%  |
| B2 1 stock 2 variables   | 8%   | 7%   | 4%   |
| R2 1 stock 2 variables   | 1%   | 1%   | 0%   |
| B3 1 stock 3 variables   | 18%  | 17%  | 19%  |
| B4 1 stock 2 variables   | 4%   | 3%   | 2%   |
| B5 1 stock 2 variables   | 7%   | 8%   | 8%   |
| B6 1 stock 2 variables   | 1%   | 0%   | 0%   |
| B7 1 stock 3 variables   | 0%   | 0%   | 0%   |
| B8 1 stock 3 variables   | 1%   | 1%   | 1%   |
| R3 3 stocks 19 variables | 2%   | 2%   | 2%   |
| B9 1 stock 7 variables   | 0%   | 0%   | 0%   |
| B10 1 stock 3 variables  | 13%  | 15%  | 16%  |
| R4 1 stock 6 variables   | 0%   | 0%   | 0%   |
| B11 1 stock 6 variables  | 6%   | 7%   | 7%   |
| B12 1 stock 5 variables  | 0%   | 0%   | 0%   |
| R5 3 stocks 16 variables | 0%   | 0%   | 0%   |
| R6 2 stocks 14 variables | 0%   | 0%   | 0%   |
| B13 1 stock 4 variables  | 0%   | 0%   | 0%   |

### Normalised

|                                |      |      |      |
|--------------------------------|------|------|------|
| Settlements and Infrastructure | 8%   | 8%   | 8%   |
| Freshwater Supply              | 29%  | 28%  | 30%  |
| Habitable Land                 | 18%  | 20%  | 21%  |
| Economic Activities            | 0%   | 0%   | 0%   |
| Food Supply                    | 0%   | 0%   | 0%   |
| Societal Conditions            | 44%  | 44%  | 41%  |
| Total                          | 100% | 100% | 100% |
