# Supplementary material for: Identifying key drivers of habitability loss reveals pathways for climate change adaptation in the Pacific
Source: Research Square preprint supplement (doi:10.21203/rs.3.rs-6130097/v1), 2025-03-18
Supplement: Supplementary file 6 [file 5a027a7a3f6842b079c9529d.pdf]

## Loop Dominance SSP 1-2.6

[illegible]

### Normalised

[illegible]

## Loop Dominance SSP 1-2.6

[illegible]

### Normalised

[illegible]

## Loop Dominance SSP 1-2.6

[illegible]

### Normalised

[illegible]

## Loop Dominance SSP 1-2.6

[illegible]

### Normalised

[illegible]

## Loop Dominance SSP 1-2.6

[illegible]

### Normalised

[illegible]

## Loop Dominance SSP 1-2.6

[illegible]

### Normalised

[illegible]

## Loop Dominance SSP 1-2.6

[illegible]

### Normalised

[illegible]

## Loop Dominance SSP 1-2.6

| Loop Label                | 2095 | 2096 | 2097 | 2098 | 2099 | 2100 |
|---------------------------|------|------|------|------|------|------|
| R1 1 stock 2 variables    | 21%  | 16%  | 20%  | 13%  | 15%  | 15%  |
| B1 1 stock 2 variables    | 19%  | 27%  | 19%  | 12%  | 13%  | 13%  |
| B2 1 stock 4 variables    | 3%   | 6%   | 2%   | 14%  | 10%  | 6%   |
| R2 1 stock 2 variables    | 5%   | 7%   | 5%   | 3%   | 3%   | 3%   |
| B3 1 stock 2 variables    | 8%   | 11%  | 8%   | 5%   | 6%   | 5%   |
| B4 1 stock 2 variables    | 6%   | 4%   | 5%   | 3%   | 4%   | 4%   |
| B5 1 stock 2 variables    | 3%   | 4%   | 3%   | 2%   | 2%   | 2%   |
| B6 1 stock 3 variables    | 15%  | 11%  | 18%  | 13%  | 19%  | 27%  |
| B7 1 stock 3 variables    | 6%   | 3%   | 6%   | 4%   | 5%   | 7%   |
| B8 1 stock 7 variables    | 1%   | 1%   | 1%   | 0%   | 0%   | 0%   |
| B9 1 stock 3 variables    | 2%   | 0%   | 1%   | 21%  | 15%  | 9%   |
| R3 1 stock 6 variables    | 1%   | 0%   | 0%   | 0%   | 0%   | 0%   |
| B10 1 stock 3 variables   | 4%   | 4%   | 4%   | 3%   | 4%   | 4%   |
| B11 1 stock 6 variables   | 6%   | 5%   | 6%   | 4%   | 5%   | 5%   |
| B12 1 stock 5 variables   | 0%   | 0%   | 0%   | 0%   | 0%   | 0%   |
| R4 1 stock 6 variables    | 0%   | 0%   | 0%   | 0%   | 0%   | 0%   |
| R5 3 stocks 16 variables  | 0%   | 0%   | 0%   | 0%   | 0%   | 0%   |
| R6 2 stocks 14 variables  | 0%   | 0%   | 0%   | 0%   | 0%   | 0%   |
| B13 1 stock 4 variables   | 0%   | 0%   | 0%   | 0%   | 0%   | 0%   |
| B14 3 stocks 18 variables | 0%   | 0%   | 0%   | 0%   | 0%   | 0%   |

### Normalised

|                                |      |      |      |      |      |      |
|--------------------------------|------|------|------|------|------|------|
| Settlements and Infrastructure | 11%  | 7%   | 11%  | 8%   | 10%  | 11%  |
| Freshwater Supply              | 6%   | 7%   | 4%   | 35%  | 24%  | 14%  |
| Habitable Land                 | 23%  | 18%  | 26%  | 19%  | 26%  | 34%  |
| Economic Activities            | 1%   | 0%   | 1%   | 0%   | 0%   | 0%   |
| Food Supply                    | 0%   | 0%   | 0%   | 0%   | 0%   | 0%   |
| Societal Conditions            | 60%  | 67%  | 58%  | 38%  | 41%  | 40%  |
| Total                          | 100% | 100% | 100% | 100% | 100% | 100% |
