# Supplementary figures and images for: Identifying key drivers of habitability loss reveals pathways for climate change adaptation in the Pacific
Source: Research Square preprint supplement (doi:10.21203/rs.3.rs-6130097/v1), 2025-03-18

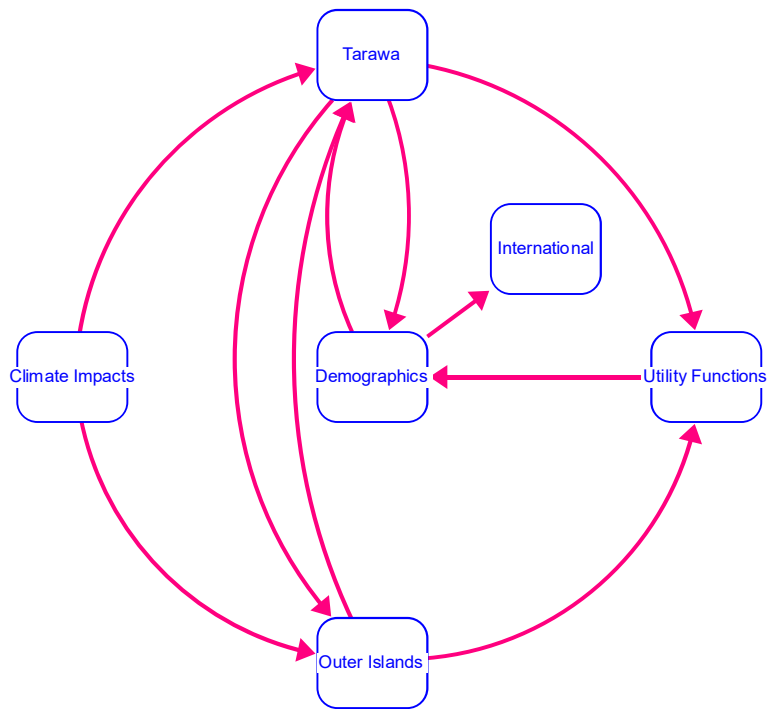

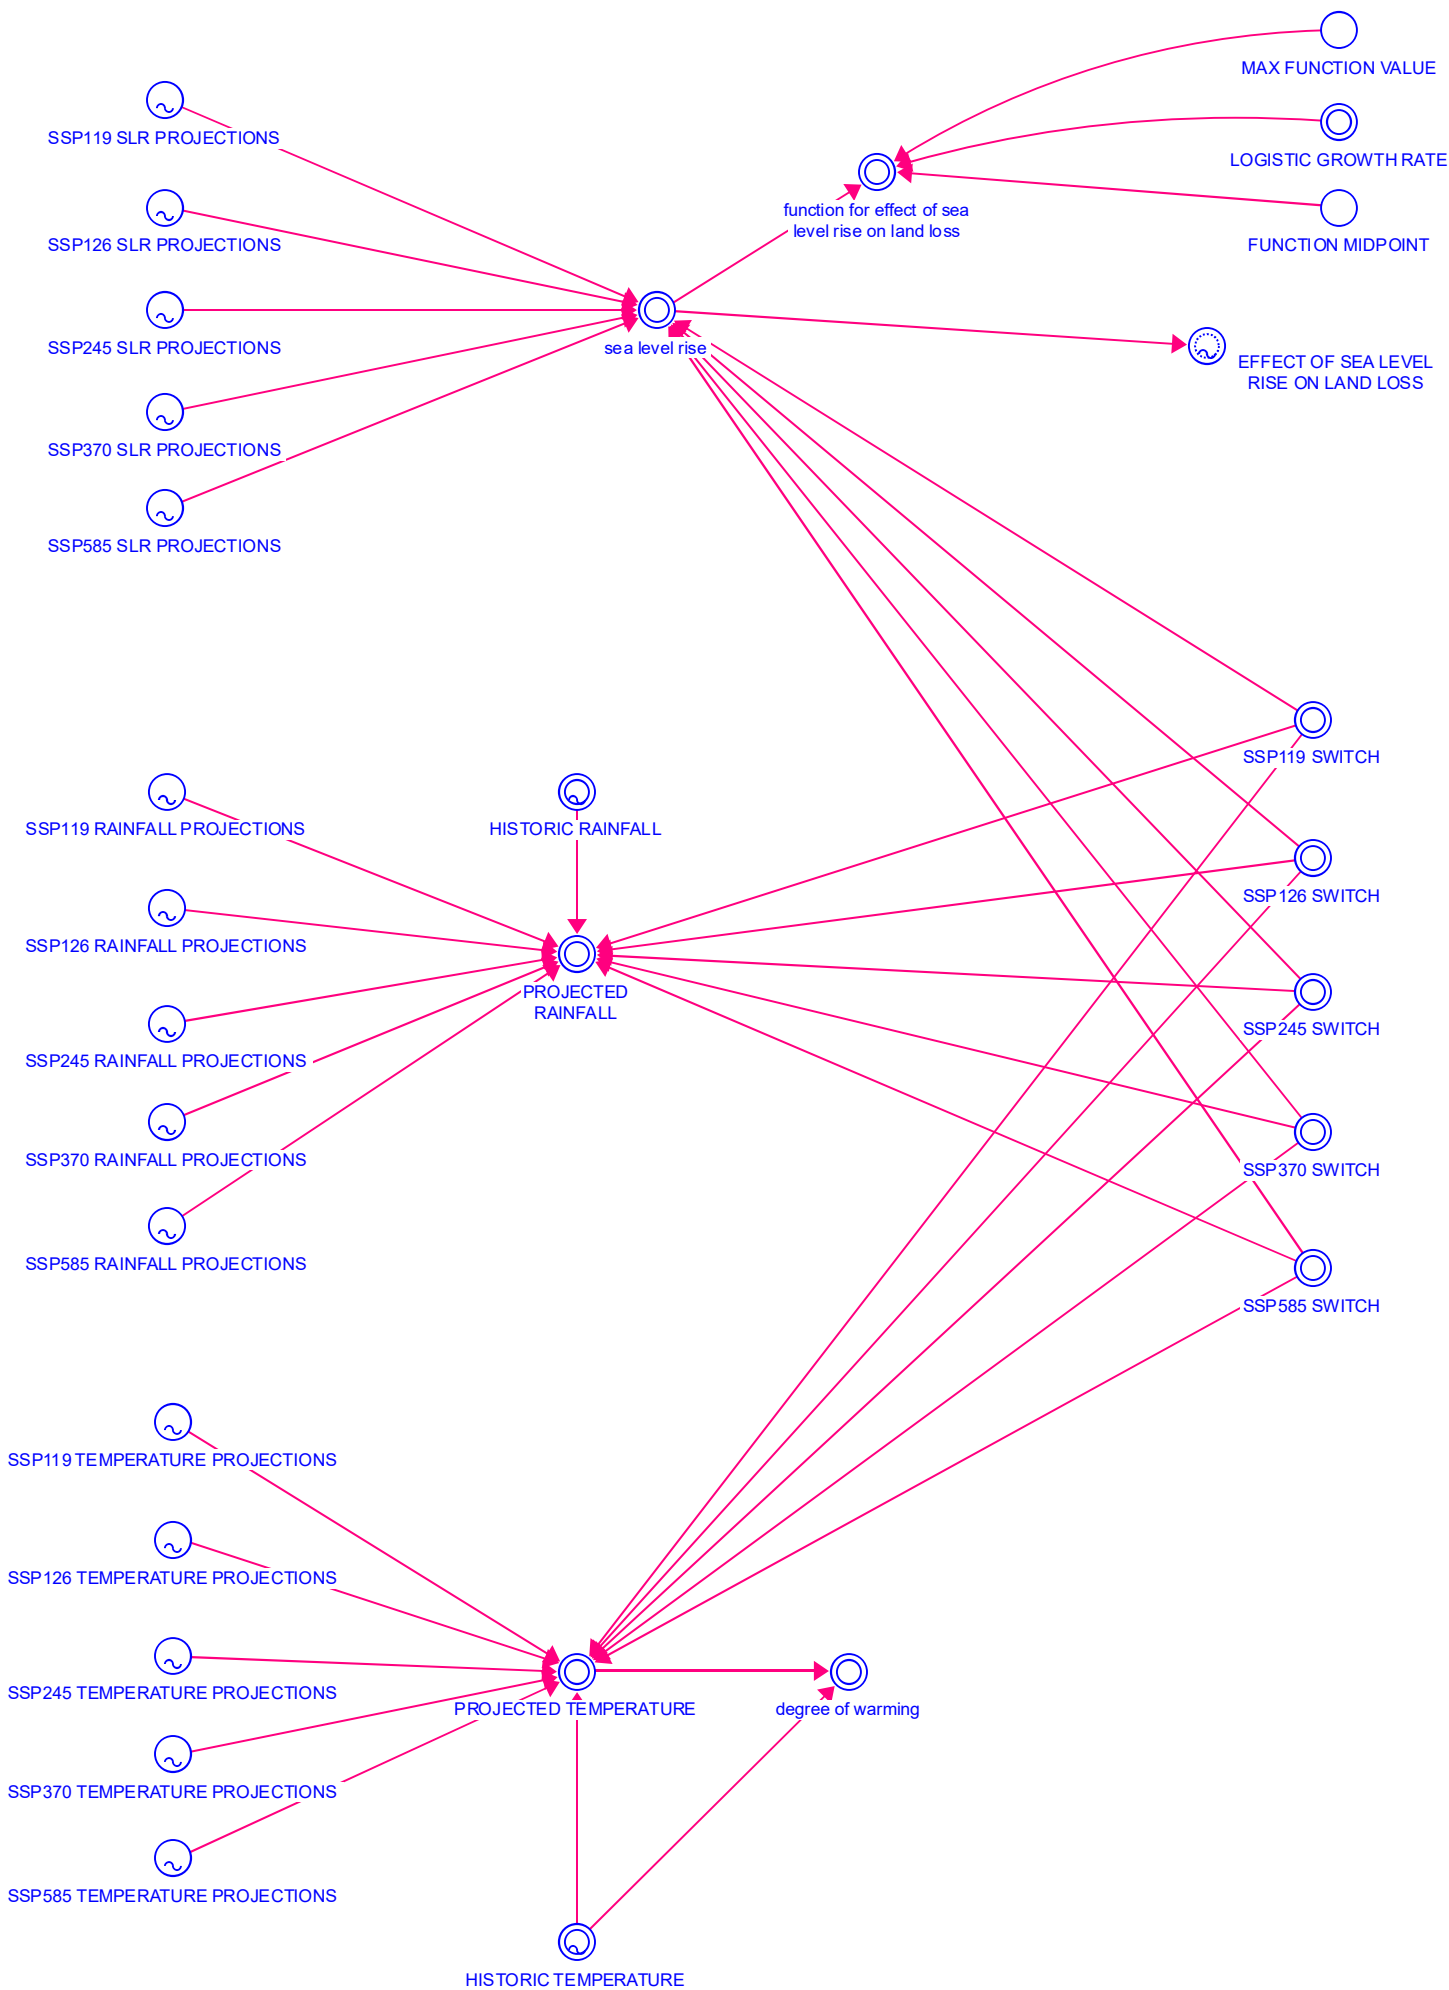

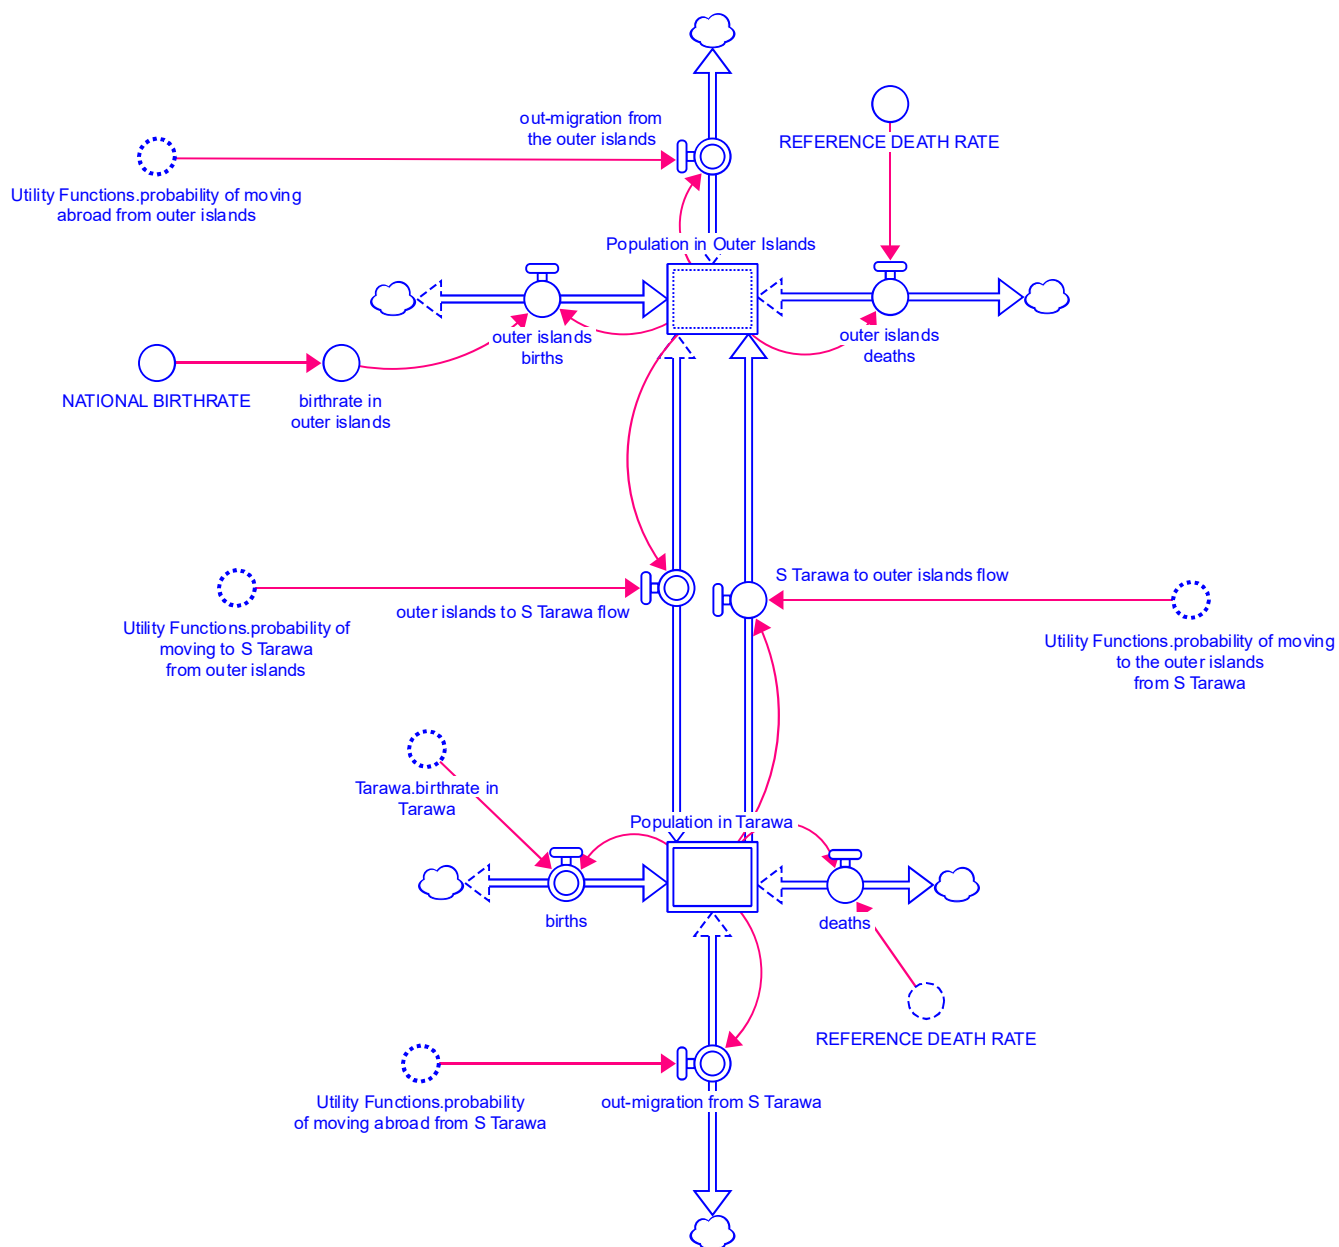

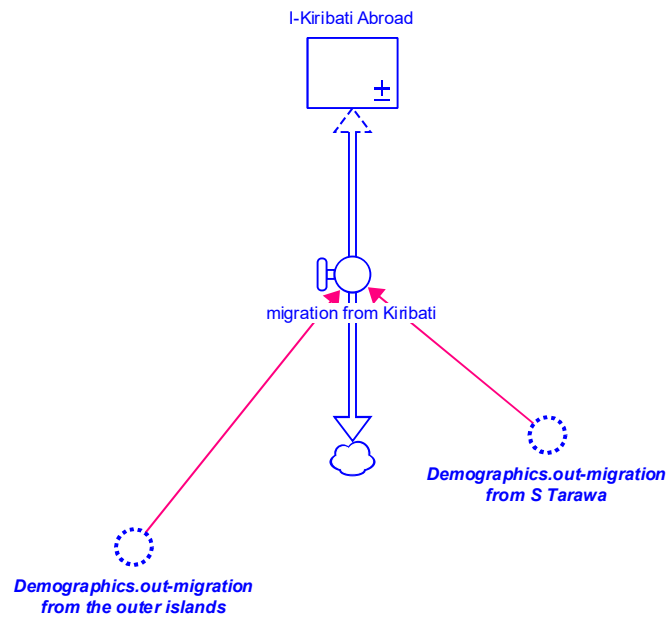

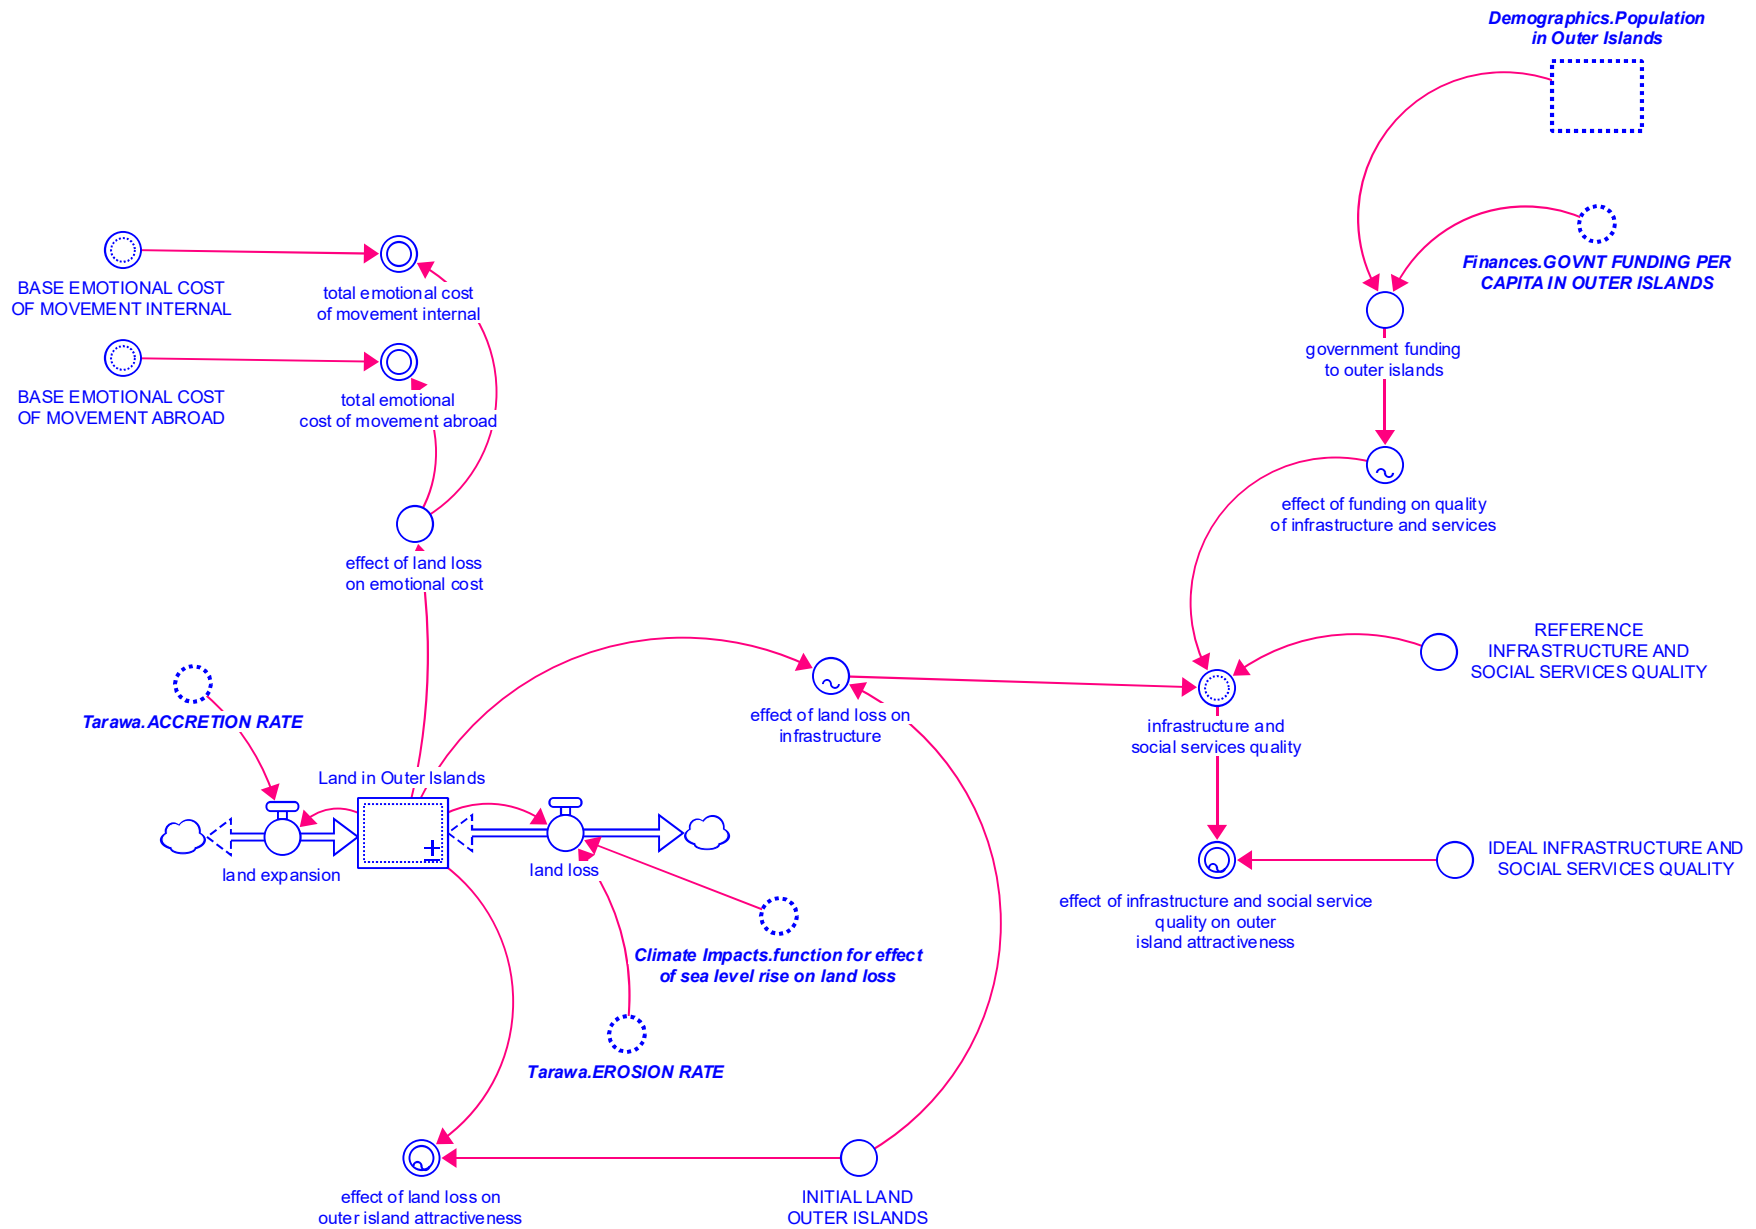

Outer Islands

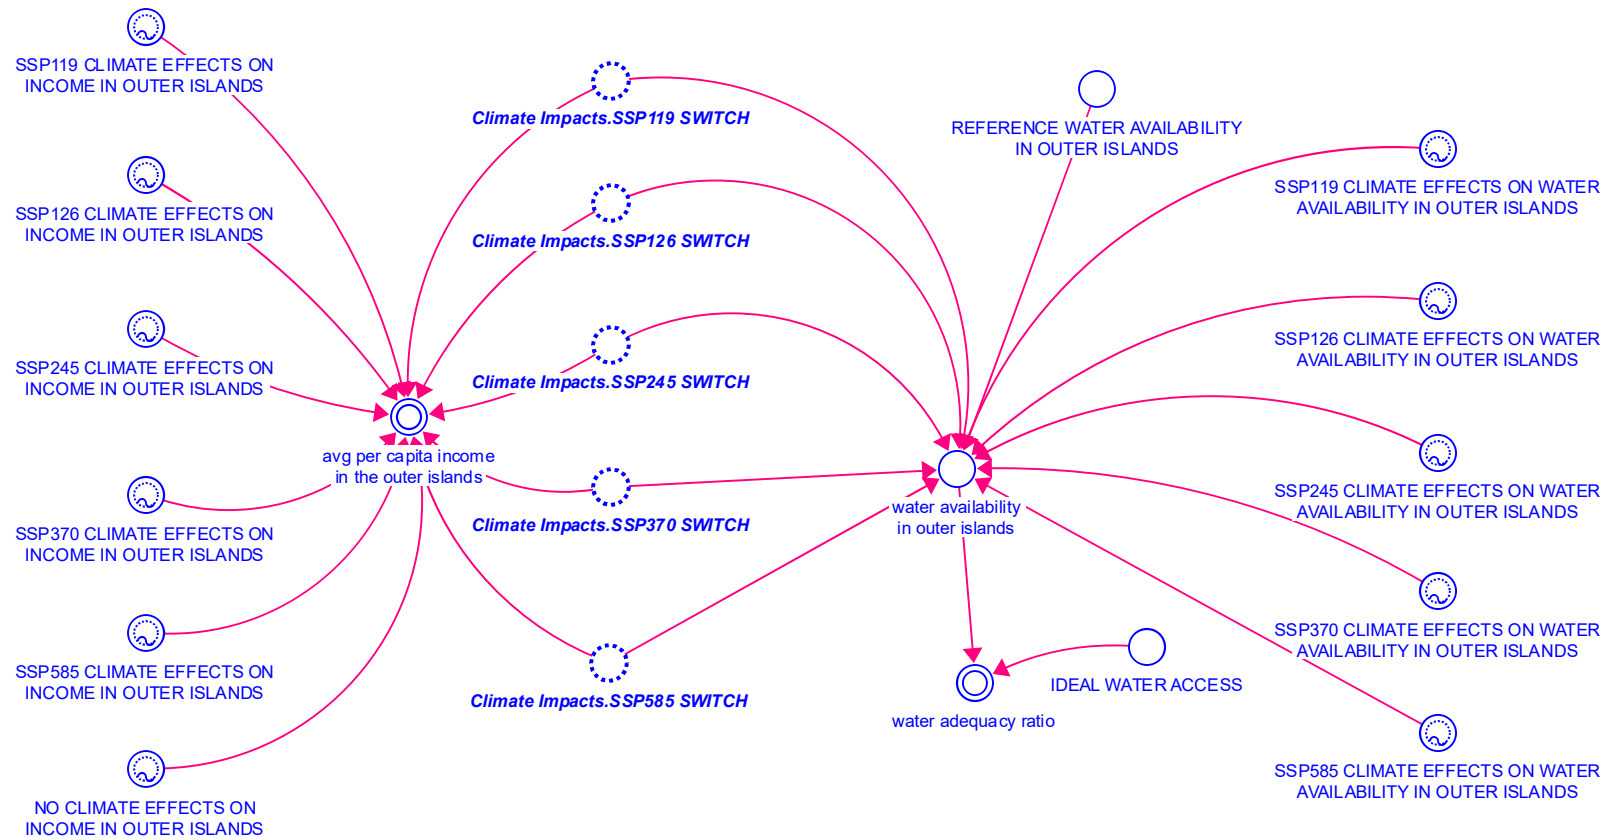

Outer Islands

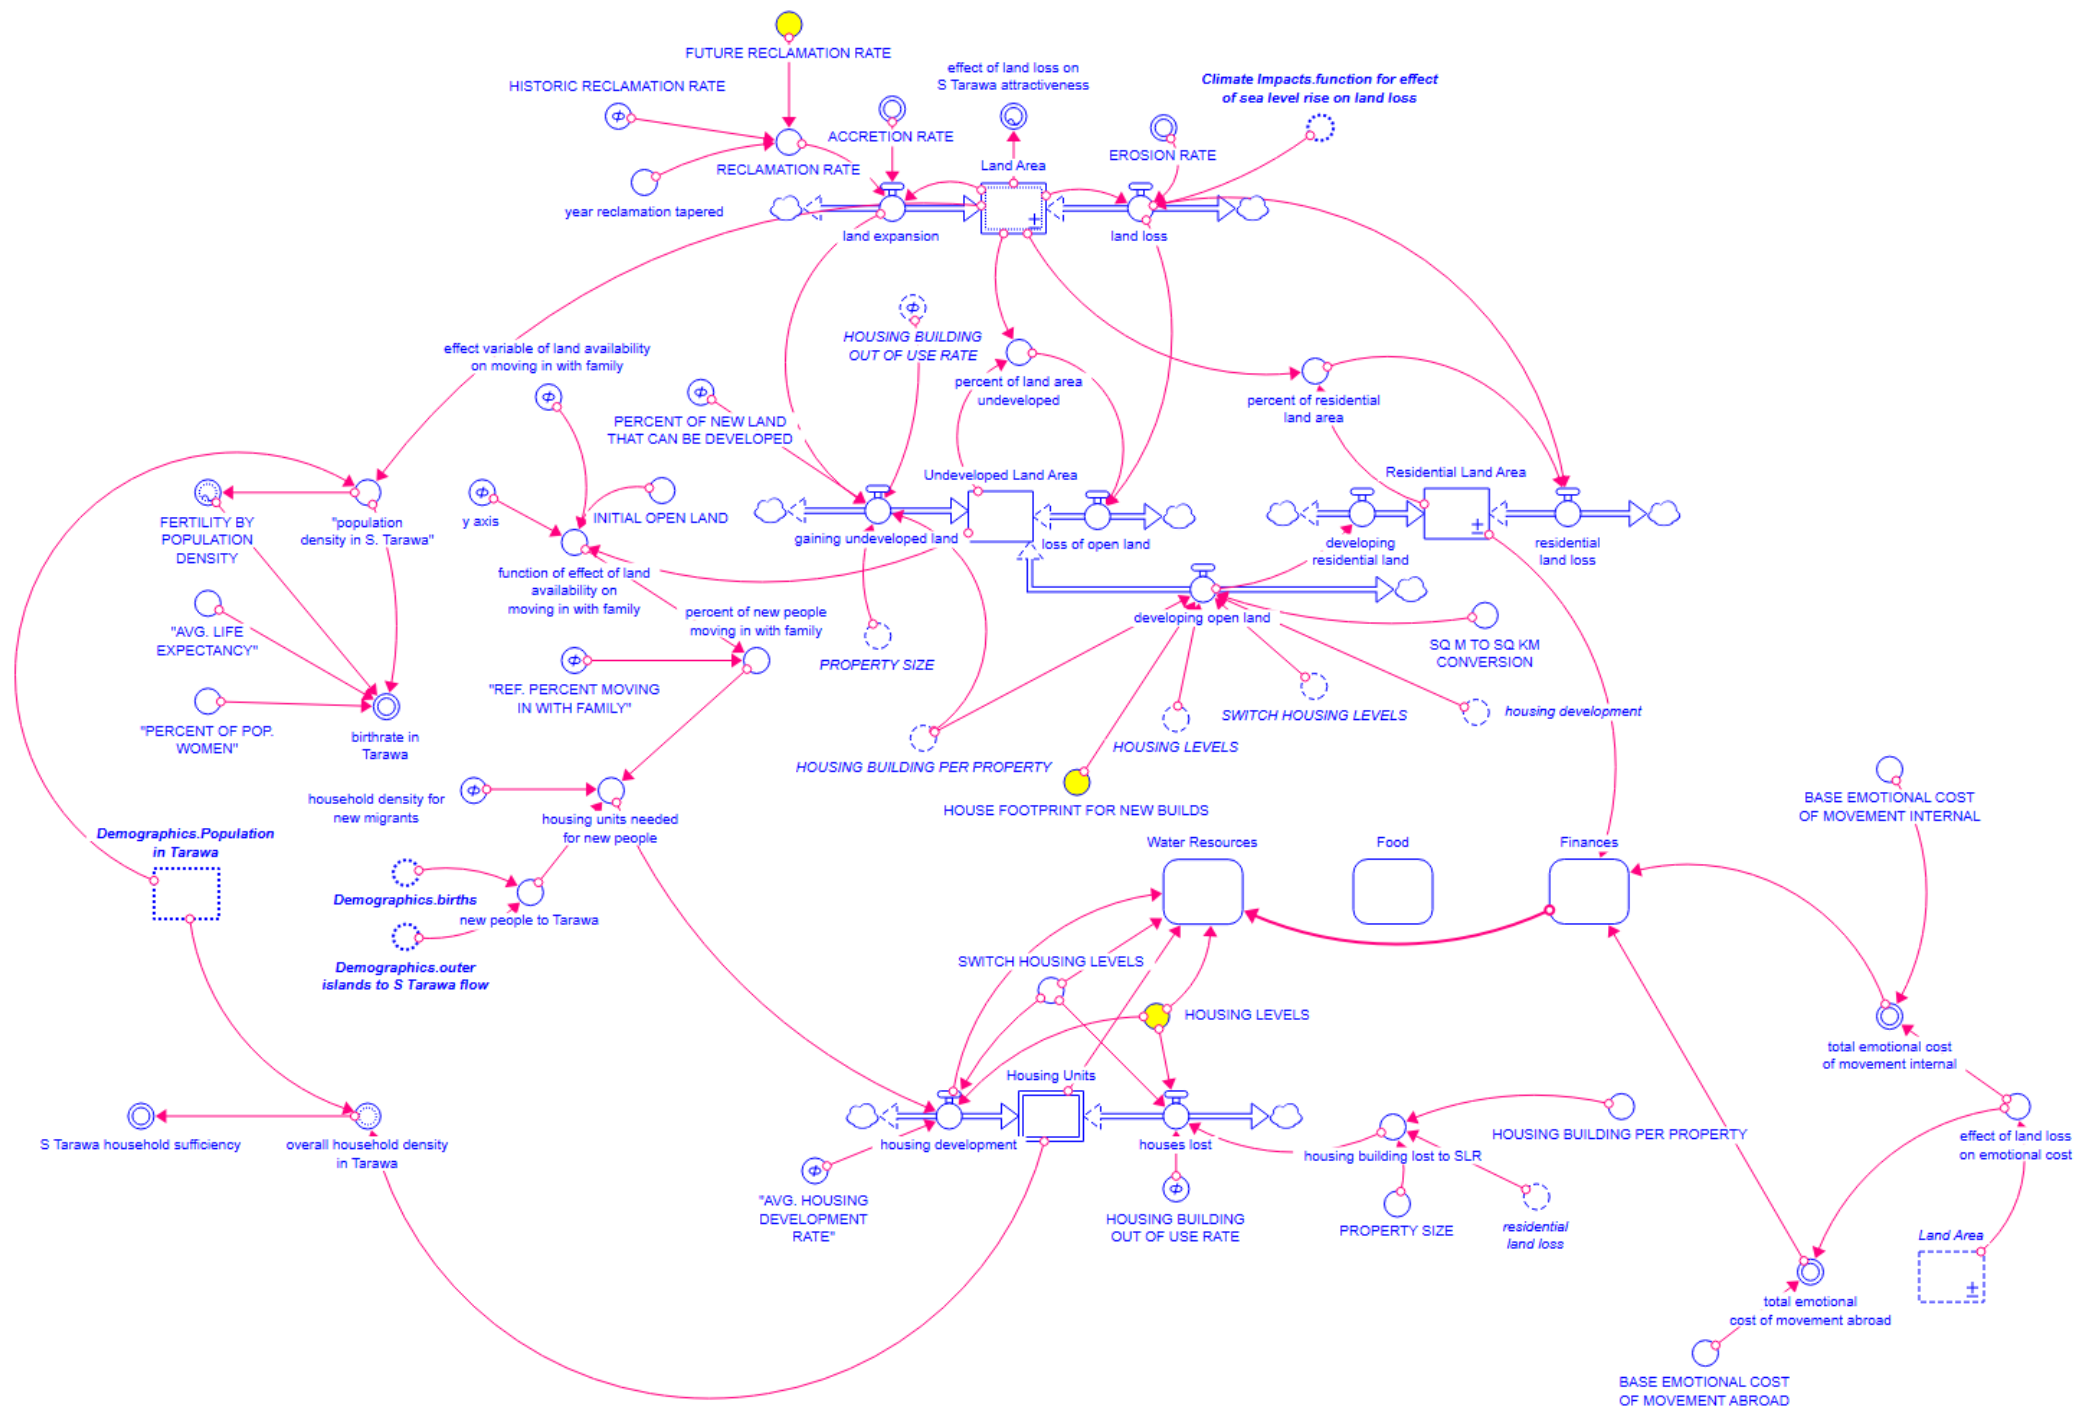

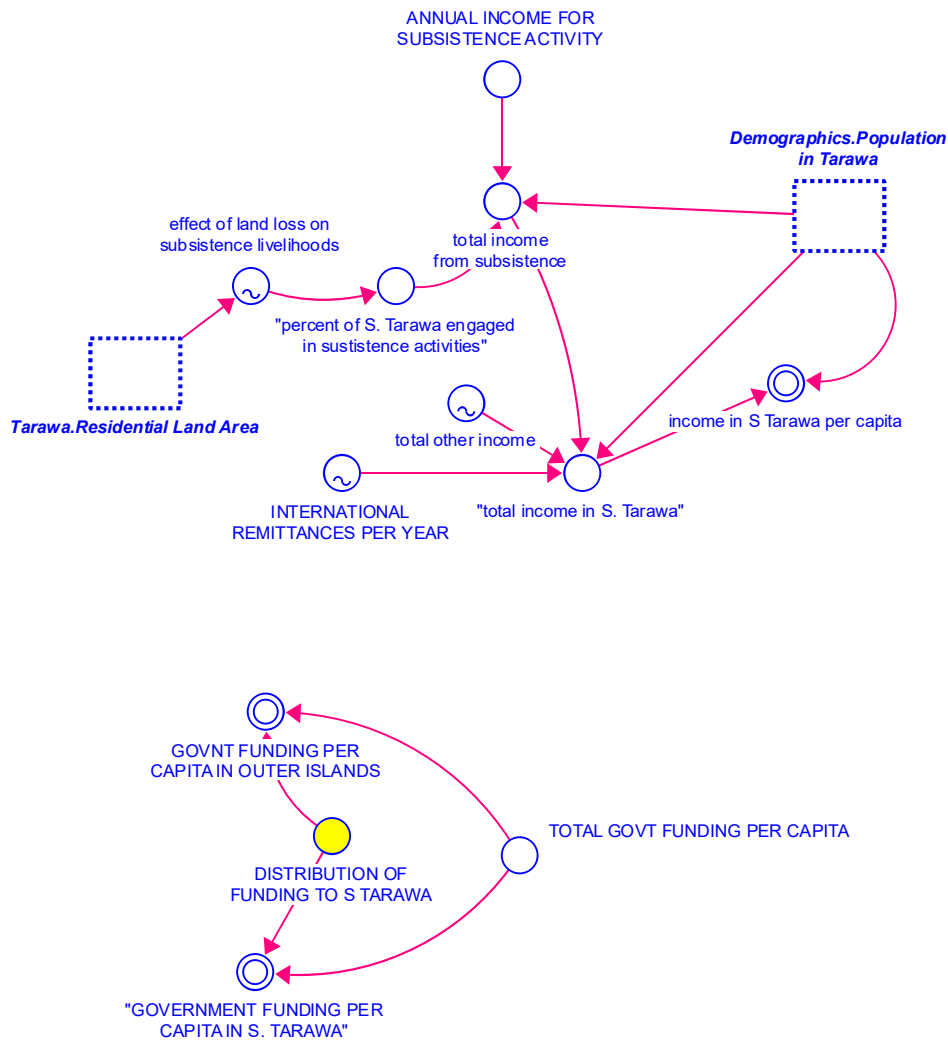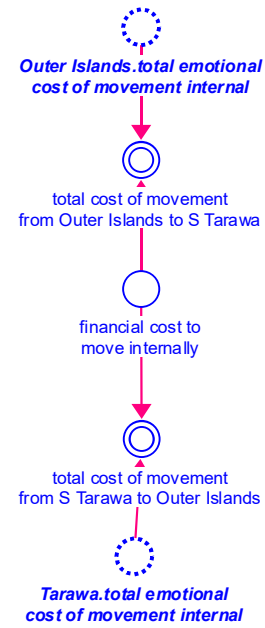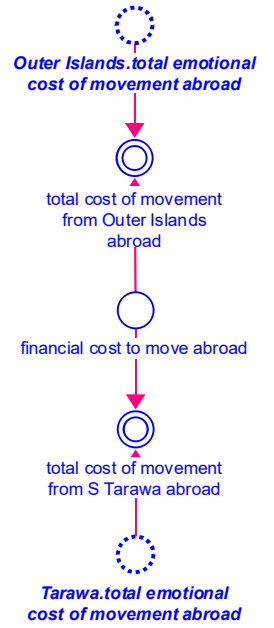



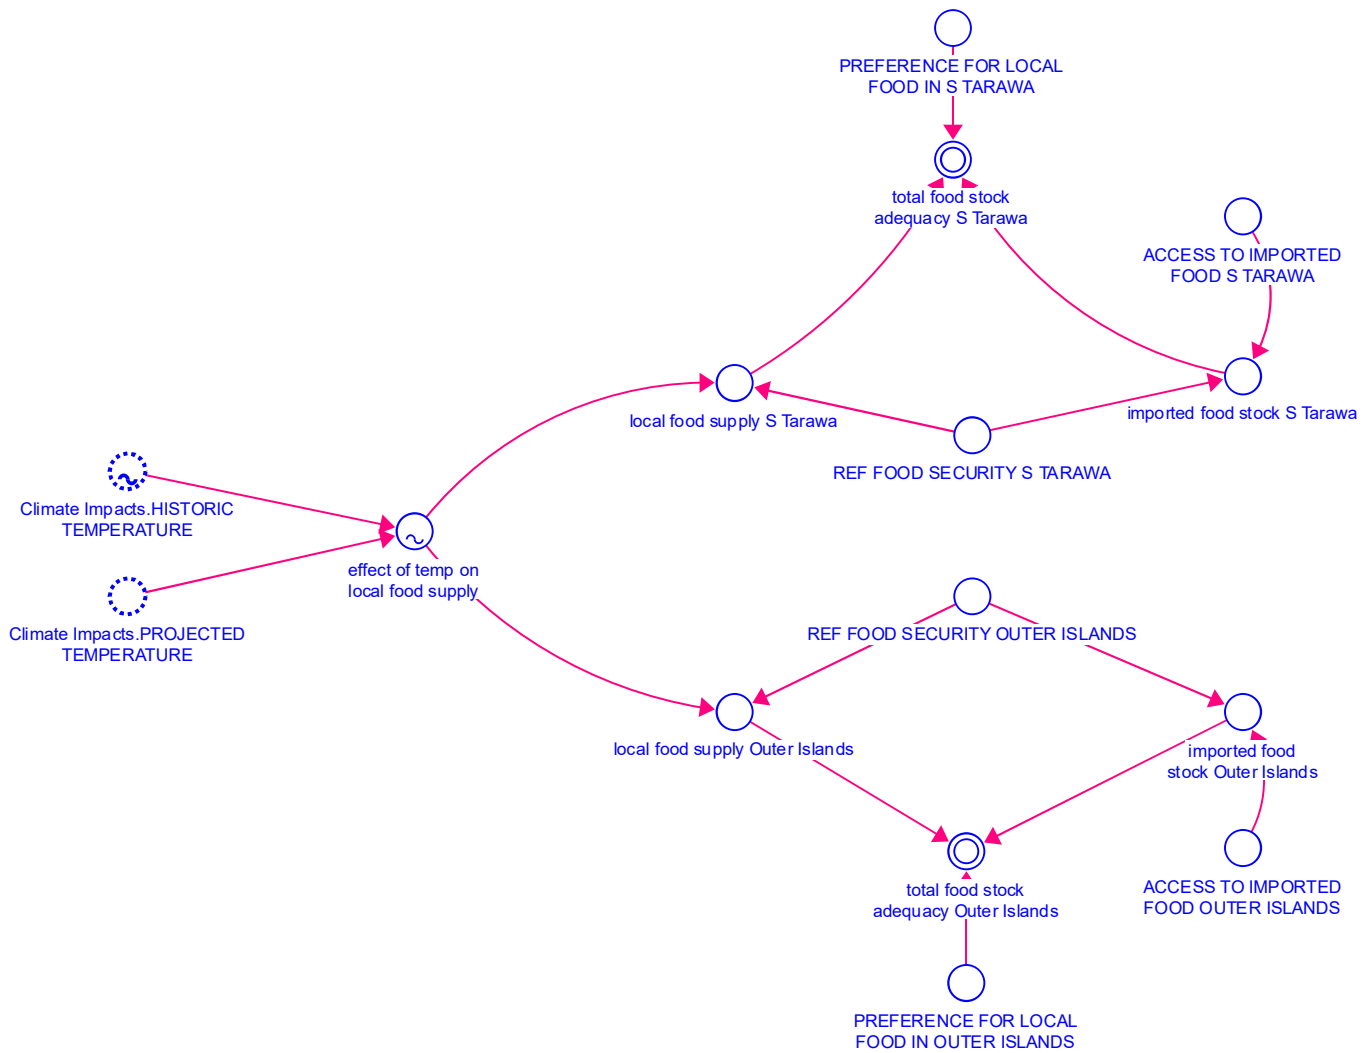

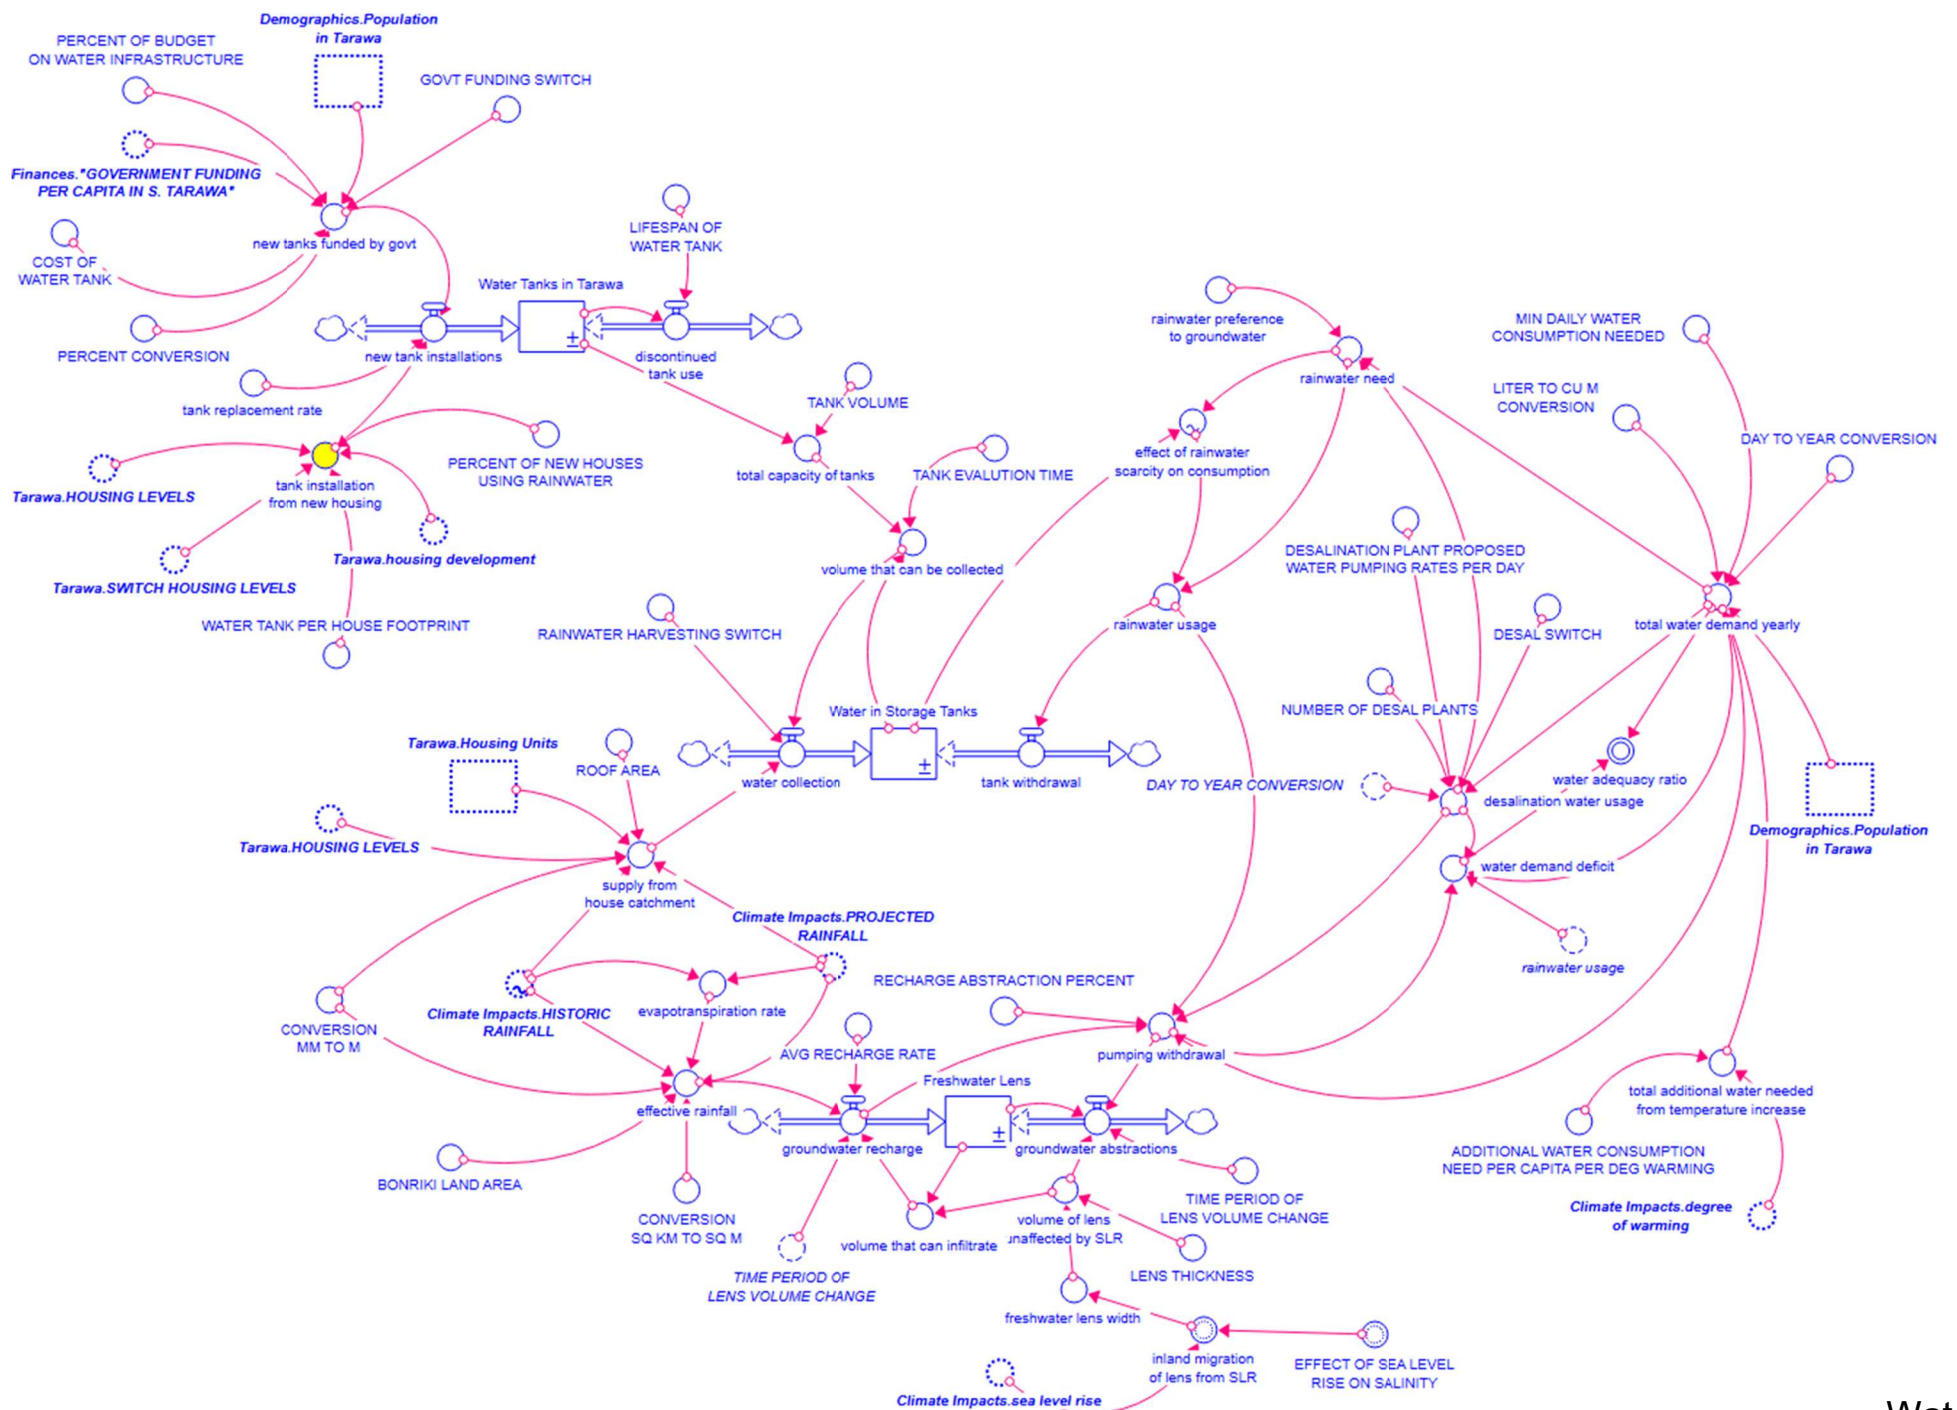

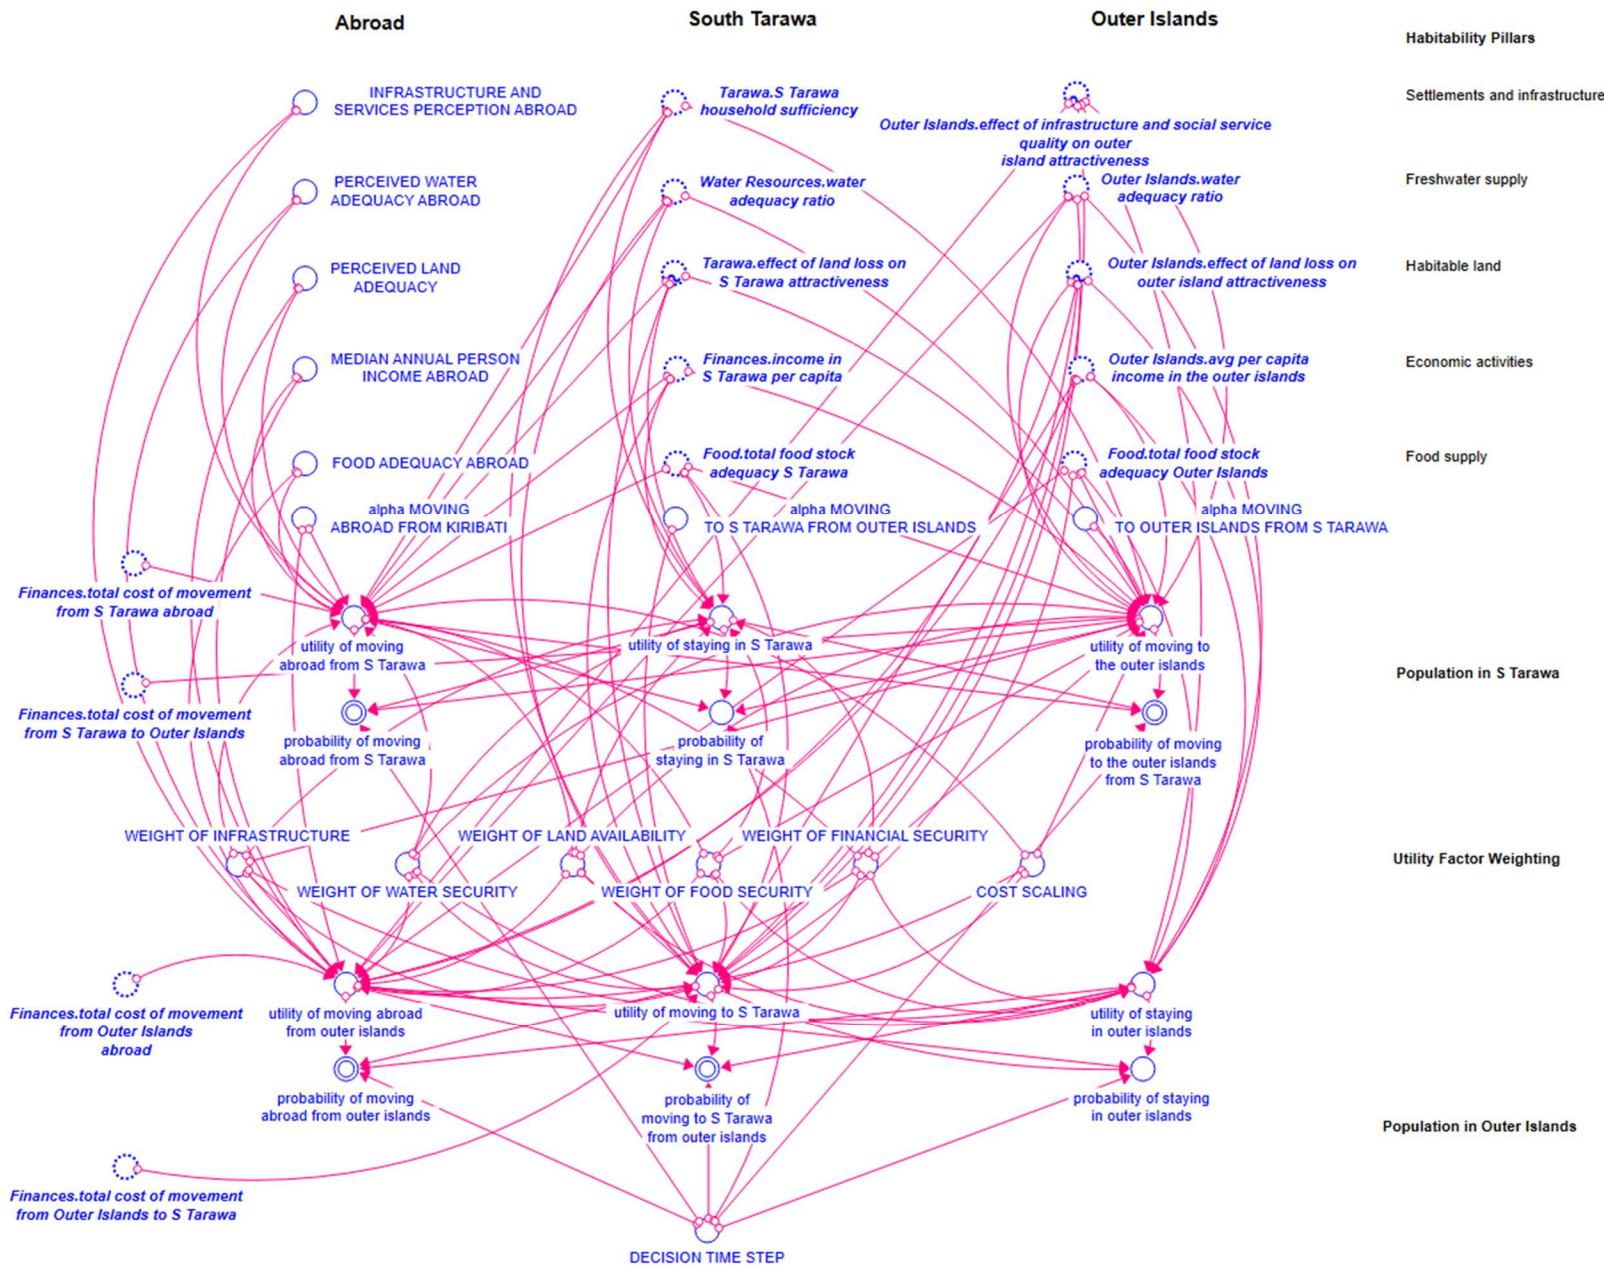

Supplement: Supplementary file 2 [file 0be3f1ec3afc587ee2f7f588.pdf]
